# Supplementary material for: Synthesis of N-alkyl pyrroles via decarboxylation/dehydration in neutral ionic liquid under catalyst-free conditions
Source: Royal Society of Chemistry journal article supplement (doi:10.1039/c4ra09797a), 2014-01-01
Supplement: c4ra09797a1.pdf [file c4ra09797a1.pdf]

## Supporting Information

### Synthesis of *N*-alkyl pyrroles via decarboxylation/ dehydration in neutral ionic liquid under catalyst-free condition

Veena D. Yadav,<sup>a</sup> Shashikant U. Dighe,<sup>a</sup> Sanjay Batra\*<sup>a,b</sup>

<sup>a</sup>*Medicinal and Process Chemistry Division, CSIR-Central Drug Research Institute, BS-10/1, Sector 10, Jankipuram Extension, Sitapur Road, PO Box 173, Lucknow-226031, UP, India.*

<sup>b</sup>*Academy of Scientific and Innovative Research, New Delhi*

E mail: batra\_san@yahoo.co.uk

#### Contents

|                                    |     |
|------------------------------------|-----|
| 1. Spectroscopic Data of Compounds | S-2 |
| 2. References                      | S-5 |
| 3. Copies of Spectra of Compounds  | S-6 |

## Spectroscopic data

**1-Benzyl-1H-pyrrole<sup>1</sup> (2b).** Yield: 56% (0.082 g from 0.1 g); a light yellow oil;  $R_f = 0.52$  (Hexanes: EtOAc, 9:1, v/v); IR (neat)  $\nu_{max}$ : 761, 968, 1085, 1282, 1447, 1498, 2924, 3020  $\text{cm}^{-1}$ .  $^1\text{H}$  NMR (400 MHz,  $\text{CDCl}_3$ ):  $\delta = 4.95$  (s, 2H), 6.16 (t,  $J = 2.1$  Hz, 2H), 6.62 (t,  $J = 2.1$  Hz, 2H), 7.04 (d,  $J = 7.1$  Hz, 2H), 7.21-7.25 (m, 3H);  $^{13}\text{C}$  NMR (100 MHz,  $\text{CDCl}_3$ ):  $\delta = 53.5, 108.9, 121.5, 127.3, 127.9, 129.1, 138.6$ . MS (ESI+):  $m/z = 158.0$ . ESI-HR-MS calculated for  $\text{C}_{11}\text{H}_{11}\text{N}$  ( $\text{M}^+\text{+H}$ ): 158.0970, found: 158.0976.

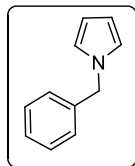

**4-((1H-pyrrol-1-yl)methyl)benzonitrile (2c).** Yield: 78% (0.108 g from 0.1 g); yellow solid; mp 70-72  $^{\circ}\text{C}$ ;  $R_f = 0.44$  (Hexanes: EtOAc, 9:1, v/v); IR (neat)  $\nu_{max}$ : 762, 1216, 1391, 1670, 2421, 3020,  $\text{cm}^{-1}$ .  $^1\text{H}$  NMR (400 MHz,  $\text{CDCl}_3$ ):  $\delta = 5.12$  (s, 2H), 6.22 (t,  $J = 2.1$  Hz, 2H), 6.67 (t,  $J = 2.1$  Hz, 2H), 7.13 (d,  $J = 8.3$  Hz, 2H), 7.56 (d,  $J = 8.3$  Hz, 2H);  $^{13}\text{C}$  NMR (100 MHz,  $\text{CDCl}_3$ ):  $\delta = 52.7, 111.5, 118.6, 121.3, 127.4, 132.6, 143.9$ . MS (ESI+):  $m/z = 183.0$ . ESI-HR-MS calculated for  $\text{C}_{12}\text{H}_{10}\text{N}_2$  ( $\text{M}^+\text{+H}$ ): 183.0922, found: 183.0924.

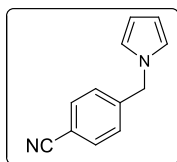

**4-((1H-pyrrol-1-yl)methyl)benzaldehyde (2d).** Yield: 65% (0.089 g from 0.1 g); a light brown oil;  $R_f = 0.40$  (Hexanes: EtOAc, 9:1, v/v); IR (neat)  $\nu_{max}$ : 742, 1214, 1528, 1621, 1665, 3020  $\text{cm}^{-1}$ .  $^1\text{H}$  NMR (400 MHz,  $\text{CDCl}_3$ ):  $\delta = 5.03$  (s, 2H), 6.15 (t,  $J = 1.84$  Hz, 2H), 6.66 (t,  $J = 1.84$  Hz, 2H), 7.56 (d,  $J = 8.1$  Hz, 2H), 6.98 (d,  $J = 7.8$  Hz, 2H) 9.91 (s, 1H);  $^{13}\text{C}$  NMR (100 MHz,  $\text{CDCl}_3$ ):  $\delta$  (ppm) = 52.8, 108.4, 120.9, 122.2, 123.7, 127.3, 136.7, 187.5. MS (ESI+):  $m/z = 186.1$ . ESI-HR-MS calculated for  $\text{C}_{12}\text{H}_{11}\text{NO}$  ( $\text{M}^+\text{+H}$ ): 186.0919, found: 186.0921.

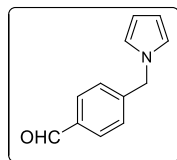

**1-(4-Nitrobenzyl)-1H-pyrrole<sup>2</sup> (2e).** Yield: 80% (0.118 g from 0.1 g); yellow solid; mp 88-90  $^{\circ}\text{C}$ ;  $R_f = 0.42$  (Hexanes: EtOAc, 9:1, v/v); IR (neat)  $\nu_{max}$ : 761, 1216, 1523, 1652, 3021  $\text{cm}^{-1}$ .  $^1\text{H}$  NMR (400 MHz,  $\text{CDCl}_3$ ):  $\delta = 5.26$  (s, 2H), 6.21 (t,  $J = 2.1$  Hz, 2H), 6.77 (t,  $J = 2.1$  Hz, 2H), 7.27 (d,  $J = 8.6$  Hz, 2H), 8.23 (d,  $J = 8.7$  Hz, 2H);  $^{13}\text{C}$  NMR (100 MHz,  $\text{CDCl}_3$ ):  $\delta = 52.6, 109.4, 121.3, 124.1, 127.4, 145.7, 147.5$ . MS (ESI+):  $m/z = 203.0$ . ESI-HR-MS calculated for  $\text{C}_{11}\text{H}_{10}\text{N}_2\text{O}_2$  ( $\text{M}^+\text{+H}$ ): 203.0821, found: 203.0822.

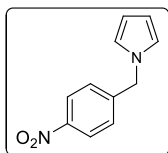

**1-(3-Nitrobenzyl)-1H-pyrrole (2f).** Yield: 69% (0.092 g from 0.1 g); a yellow solid; mp 70-72  $^{\circ}\text{C}$ ;  $R_f = 0.40$  (Hexanes: EtOAc, 9:1, v/v); IR (neat)  $\nu_{max}$ : 789, 1225, 1401, 1538, 1602, 2488, 2986, 3019  $\text{cm}^{-1}$ .  $^1\text{H}$  NMR (400 MHz,  $\text{CDCl}_3$ ):  $\delta = 5.71$  (s, 2H), 6.24 (t,  $J = 2.1$  Hz, 2H), 6.70 (t,  $J = 2.1$  Hz, 2H), 7.36 (dd,  $J_1 = 0.6$  Hz,  $J_2 = 0.6$  Hz, 1H), 7.51 (t,  $J = 7.8$  Hz, 1H), 7.97 (s, 1H), 8.12 (dd,  $J_1 = 1.2$  Hz,  $J_2 = 1.3$  Hz, 1H);  $^{13}\text{C}$  NMR (100 MHz,  $\text{CDCl}_3$ ):  $\delta = 52.5, 119.4, 121.2, 121.8, 122.7, 129.8, 132.9, 140.6, 148.5$ . MS (ESI+):  $m/z = 203.0$ . ESI-HR-MS calculated for  $\text{C}_{11}\text{H}_{10}\text{N}_2\text{O}_2$  ( $\text{M}^+\text{+H}$ ): 203.0821, found: 203.0822.

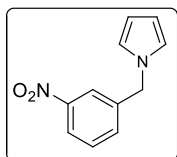

**1-(2-Methoxybenzyl)-1H-pyrrole<sup>1</sup> (2g).** Yield: 59% (0.083 g from 0.1 g); a colourless oil;  $R_f = 0.44$  (Hexanes: EtOAc, 9:1, v/v); IR (neat)  $\nu_{max}$ : 766, 901, 1221, 1570, 1608, 2995, 3012  $\text{cm}^{-1}$ .  $^1\text{H NMR}$  (400 MHz,  $\text{CDCl}_3$ ):  $\delta = 3.69$  (s, 3H), 4.94 (s, 2H), 6.06 (t,  $J = 2.1$  Hz, 2H), 6.58 (t,  $J = 2.1$  Hz, 2H), 6.68-6.77 (m, 3H), 7.09-7.14 (m, 1H);  $^{13}\text{C NMR}$  (100 MHz,  $\text{CDCl}_3$ ):  $\delta$  (ppm) = 48.3, 55.3, 108.1, 110.2, 120.7, 121.3, 128.3, 128.8, 135.9, 156.9. MS (ESI+):  $m/z = 187.9$ . ESI-HR-MS calculated for  $\text{C}_{12}\text{H}_{13}\text{NO}$  ( $\text{M}^+\text{+H}$ ): 188.1075, found: 188.1078.

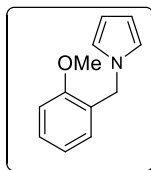

**1-(3,4-Dimethoxybenzyl)-1H-pyrrole (2h).** Yield: 64% (0.083 g from 0.1 g); a sea green oil;  $R_f = 0.38$  (Hexanes: EtOAc, 9:1, v/v); IR (neat)  $\nu_{max}$ : 761, 1086, 1144, 1263, 1459, 1515, 1599, 2935, 3018  $\text{cm}^{-1}$ .  $^1\text{H NMR}$  (400 MHz,  $\text{CDCl}_3$ ):  $\delta = 3.86$  (s, 3H), 3.96 (s, 3H), 5.04 (s, 2H), 6.23 (t,  $J = 2.1$  Hz, 2H), 6.69 (d,  $J = 1.9$  Hz, 1H), 6.73 (t,  $J = 2.2$  Hz, 2H), 6.76 (d,  $J = 2.1$  Hz, 1H), 6.86 (d,  $J = 8.2$  Hz, 1H);  $^{13}\text{C NMR}$  (100 MHz,  $\text{CDCl}_3$ ):  $\delta = 52.6, 55.4, 55.5, 108.1, 110.2, 110.9, 119.2, 120.6, 130.4, 148.3, 148.8$ . MS (ESI+):  $m/z = 217.8$ . ESI-HR-MS calculated for  $\text{C}_{13}\text{H}_{15}\text{NO}_2$  ( $\text{M}^+\text{+H}$ ): 218.1181, found: 218.1184.

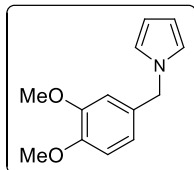

**1-(3-Methoxy-2-nitrobenzyl)-1H-pyrrole (2i).** Yield: 65% (0.078 g from 0.1 g); a pale white solid; mp 96-98 °C;  $R_f = 0.40$  (Hexanes: EtOAc, 9:1, v/v); IR (neat)  $\nu_{max}$ : 758, 1215, 1384, 1403, 1533, 1654, 3019  $\text{cm}^{-1}$ .  $^1\text{H NMR}$  (400 MHz,  $\text{CDCl}_3$ ):  $\delta = 3.93$  (s, 3H), 5.09 (s, 2H), 6.23 (t,  $J = 2.1$  Hz, 2H), 6.46 (d,  $J = 7.8$  Hz, 1H), 6.69 (t,  $J = 2.1$  Hz, 2H), 6.99 (d,  $J = 8.3$  Hz, 2H), 7.37 (t,  $J = 8.2$  Hz, 1H);  $^{13}\text{C NMR}$  (100 MHz,  $\text{CDCl}_3$ ):  $\delta = 48.4, 56.6, 109.2, 112.0, 119.5, 121.5, 131.6, 131.9, 151.1$ . MS (ESI+):  $m/z = 233.0$ . ESI-HR-MS calculated for  $\text{C}_{12}\text{H}_{12}\text{N}_2\text{O}_3$  ( $\text{M}^+\text{+H}$ ): 233.0926, found: 233.0924.

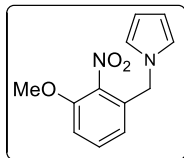

**1-(5-Chloro-2-nitrobenzyl)-1H-pyrrole (2j).** Yield: 88% (0.111 g from 0.1 g); a light brown solid; mp 76-78 °C;  $R_f = 0.39$  (Hexanes: EtOAc, 9:1, v/v); IR (neat)  $\nu_{max}$ : 760, 889, 1216, 1344, 1570, 1605, 3020  $\text{cm}^{-1}$ .  $^1\text{H NMR}$  (400 MHz,  $\text{CDCl}_3$ ):  $\delta = 5.02$  (s, 2H), 6.32 (t,  $J = 2.1$  Hz, 2H), 6.54 (t,  $J = 1.2$  Hz, 1H), 6.72 (t,  $J = 2.1$  Hz, 2H), 7.42 (dd,  $J_1 = 2.2$  Hz,  $J_2 = 2.2$  Hz, 1H), 8.11 (d,  $J = 8.7$  Hz, 1H);  $^{13}\text{C NMR}$  (100 MHz,  $\text{CDCl}_3$ ):  $\delta = 50.5, 109.9, 121.6, 126.5, 128.5, 128.6, 137.6, 141.3, 144.9$ . MS (ESI+):  $m/z = 236.9$ . ESI-HR-MS calculated for  $\text{C}_{11}\text{H}_9\text{ClN}_2\text{O}_2$  ( $\text{M}^+\text{+H}$ ): 237.0431, found: 237.0434.

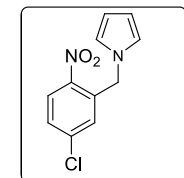

**1-(2,6-Dichlorobenzyl)-1H-pyrrole (2k).** Yield: 86% (0.114 g from 0.1 g); a white solid;  $R_f = 0.39$  (Hexanes: EtOAc, 9:1, v/v); IR (neat)  $\nu_{max}$ : 761, 1091, 1274, 1438, 1650, 3018  $\text{cm}^{-1}$ .  $^1\text{H NMR}$  (400 MHz,  $\text{CDCl}_3$ ):  $\delta = 5.37$  (s, 2H), 6.13 (t,  $J = 2.2$  Hz, 2H), 6.81 (t,  $J = 2.2$  Hz, 2H), 7.17-7.22 (m, 1H), 7.34 (d,  $J = 8.1$  Hz, 2H);  $^{13}\text{C NMR}$  (100 MHz,  $\text{CDCl}_3$ ):  $\delta = 47.9, 108.2, 121.3, 130.2, 133.2, 136.6$ . MS (ESI+):  $m/z = 226.1$ . ESI-HR-MS calculated for  $\text{C}_{11}\text{H}_9\text{Cl}_2\text{N}$  ( $\text{M}^+\text{+H}$ ): 226.0190, found: 226.0192.

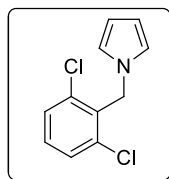

**1-(Naphthalen-1-ylmethyl)-1H-pyrrole (2l).** Yield: 77% (0.102 g from 0.1 g); a white solid;

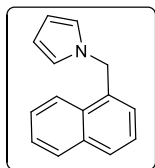

mp 62-64 °C;  $R_f = 0.41$  (Hexanes: EtOAc, 9:1, v/v); IR (neat)  $\nu_{max}$ : 668, 758, 929, 1067, 1160, 1291, 1384, 1482, 1598, 1654, 2926, 3019  $\text{cm}^{-1}$ .  $^1\text{H}$  NMR (400 MHz,  $\text{CDCl}_3$ ):  $\delta = 5.59$  (s, 2H), 6.33 (d,  $J = 1.8$  Hz, 2H), 6.82 (d,  $J = 1.7$  Hz, 2H), 7.12 (d,  $J = 7.0$  Hz, 2H), 7.51 (t,  $J = 7.2$  Hz, 1H), 7.59-7.63 (m, 2H), 7.88 (d,  $J = 8.3$  Hz, 1H), 7.97 (d,  $J = 7.5$  Hz, 1H), 8.02 (d,  $J = 8.1$  Hz, 1H);  $^{13}\text{C}$  NMR (100 MHz,  $\text{CDCl}_3$ ):  $\delta = 51.3, 108.6, 121.5, 122.7, 125.6, 125.7, 126.1, 126.7, 128.6, 128.9, 131.1, 133.6, 133.7$ . MS (ESI+):  $m/z = 208.1$ . ESI-HR-MS calculated for  $\text{C}_{15}\text{H}_{13}\text{N}$  ( $\text{M}^+\text{H}$ ): 208.1126, found: 208.1121.

**1-(Anthracen-9-ylmethyl)-1H-pyrrole<sup>2</sup> (2m).** Yield: 82% (0.102 g from 0.1 g); a yellow solid;

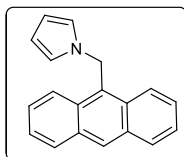

mp 150-152 °C, (Lit. 152-155 °C);  $R_f = 0.39$  (Hexanes: EtOAc, 9:1, v/v); IR (neat)  $\nu_{max}$ : 758, 1215, 1384, 1659, 3019  $\text{cm}^{-1}$ .  $^1\text{H}$  NMR (400 MHz,  $\text{CDCl}_3$ ):  $\delta$  (ppm) 6.07 (s, 2H), 6.13 (t,  $J = 2.1$  Hz, 2H), 6.68 (t,  $J = 2.1$  Hz, 2H), 7.52-7.58 (m, 4H), 8.07-8.12 (m, 2H), 8.31 (d,  $J = 8.6$  Hz, 2H), 8.55 (s, 1H);  $^{13}\text{C}$  NMR (100 MHz,  $\text{CDCl}_3$ ):  $\delta = 45.3, 108.2, 120.5, 123.6, 125.2, 125.7, 126.9, 128.8, 129.3, 131.1, 131.5$ . MS (ESI+):  $m/z = 257.9$ . ESI-HR-MS calculated for  $\text{C}_{19}\text{H}_{15}\text{N}$  ( $\text{M}^+\text{H}$ ): 258.1283, found: 258.1280.

**4-((1H-pyrrol-1-yl)methyl)pyridine<sup>2</sup> (2n).** Yield: 64% (0.044 g from 0.1 g); a brown oil;  $R_f =$

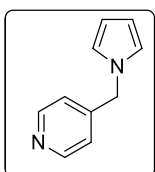

0.26 (Hexanes: EtOAc, 9:1, v/v); IR (neat)  $\nu_{max}$ : 770, 1216, 1384, 1652, 3019  $\text{cm}^{-1}$ .  $^1\text{H}$  NMR (400 MHz,  $\text{CDCl}_3$ ):  $\delta = 5.03$  (s, 2H), 6.23 (t,  $J = 1.9$  Hz, 2H), 6.65 (d,  $J = 1.6$  Hz, 2H), 6.91 (d,  $J = 4.6$  Hz, 2H), 8.51 (d,  $J = 4.6$  Hz, 2H);  $^{13}\text{C}$  NMR (100 MHz,  $\text{CDCl}_3$ ):  $\delta = 52.1, 109.3, 121.3, 147.5, 150.2$ . MS (ESI+):  $m/z = 159.09$ . ESI-HR-MS calculated for  $\text{C}_{10}\text{H}_{10}\text{N}_2$  ( $\text{M}^+\text{H}$ ): 159.0922, found: 159.0922.

**1-((5-Methylthiophen-2-yl)methyl)-1H-pyrrole (2o).** Yield: 66% (0.092 g from 0.1 g); a brown

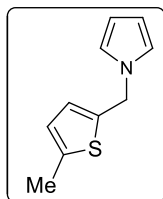

oil;  $R_f = 0.39$  (Hexanes: EtOAc, 9:1, v/v); IR (neat)  $\nu_{max}$ : 760, 967, 1084, 1217, 1275, 1397, 1440, 1495, 1679, 2404, 2862, 2922, 3012  $\text{cm}^{-1}$ .  $^1\text{H}$  NMR (400 MHz,  $\text{CDCl}_3$ ):  $\delta = 2.39$  (s, 3H), 5.08 (s, 2H), 6.16 (t,  $J = 2.2$  Hz, 2H), 6.55-6.56 (m, 1H), 6.68-6.69 (m, 3H);  $^{13}\text{C}$  NMR (100 MHz,  $\text{CDCl}_3$ ):  $\delta = 15.5, 48.4, 118.8, 120.7, 125.1, 126.1, 138.4, 140.4$ . MS (ESI+):  $m/z = 177.8$ . ESI-HR-MS calculated for  $\text{C}_{10}\text{H}_{11}\text{NS}$  ( $\text{M}^+\text{H}$ ): 178.0690, found: 178.0693.

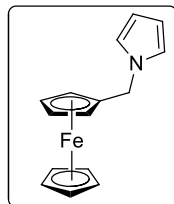

**Ferrocene-1H-pyrrole (2p).** Yield: 68% (0.083 g from 0.1 g); a brown oil;  $R_f =$  0.56 (Hexanes: EtOAc, 9:1, v/v); IR (neat)  $\nu_{max}$ : 492, 668, 761, 1086, 1217, 1272, 1390, 1631, 2926, 3015  $\text{cm}^{-1}$ .  $^1\text{H}$  NMR (400 MHz,  $\text{CDCl}_3$ ):  $\delta = 4.17$ -4.19 (m, 7H), 4.22 (t,  $J = 1.7$  Hz, 2H), 4.83 (s, 2H), 6.14 (t,  $J = 2.2$  Hz, 2H), 6.69 (t,  $J = 2.1$  Hz, 2H);  $^{13}\text{C}$  NMR (100 MHz,  $\text{CDCl}_3$ ):  $\delta = 49.1, 68.4, 68.5, 68.7, 84.5, 107.9, 120.4$ . MS (ESI+):  $m/z = 266.0$ . ESI-HR-MS calculated for  $\text{C}_{15}\text{H}_{15}\text{NFe}$  ( $\text{M}^+\text{H}$ ): 266.0632, found: 266.0637.

**1-Cinnamyl-1H-pyrrole (2q).** Yield: 60% (0.083 g from 0.1 g); a brown oil;  $R_f = 0.43$  (Hexanes: EtOAc, 9:1, v/v); IR (neat)  $\nu_{max}$ : 669, 758, 1215, 1384, 1637, 3019  $\text{cm}^{-1}$ .  $^1\text{H}$  NMR (400 MHz,  $\text{CDCl}_3$ ):  $\delta = 4.64$  (d,  $J = 5.9$  Hz, 2H), 6.18 (bs, 2H), 6.48 (d,  $J = 15.9$  Hz, 1H), 6.71 (bs, 2H), 7.24-7.36 (m, 6H);  $^{13}\text{C}$  NMR (100 MHz,  $\text{CDCl}_3$ ):  $\delta = 51.6, 108.4, 120.7, 125.5, 126.6, 127.9, 128.6, 132.6$ . MS (ESI+):  $m/z = 183.9$ . ESI-HR-MS calculated for  $\text{C}_{13}\text{H}_{13}\text{N}$  ( $\text{M}^+\text{+H}$ ): 184.1126, found: 184.1125.

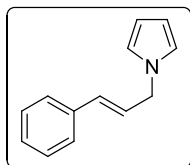

**1-Hexyl-1H-pyrrole (2r).** Yield: 58% (0.087 g from 0.1 g); a brown oil;  $R_f = 0.53$  (Hexanes: EtOAc, 9:1, v/v); IR (neat)  $\nu_{max}$ : 732, 930, 1210, 1569, 2995  $\text{cm}^{-1}$ .  $^1\text{H}$  NMR (400 MHz,  $\text{CDCl}_3$ ):  $\delta = 0.86$ -0.91 (m, 3H), 1.25-1.33 (m, 6H), 2.03 (q,  $J = 7.3$  Hz, 2H), 4.36 (bs, 2H), 6.13 (t,  $J = 2.1$  Hz, 2H), 6.61 (t,  $J = 2.1$  Hz, 2H);  $^{13}\text{C}$  NMR (100 MHz,  $\text{CDCl}_3$ ):  $\delta = 14.1, 22.6, 27.6, 29.4, 30.5, 31.6, 55.7, 107.8, 120.8$ . MS (ESI+):  $m/z = 152.1$ . ESI-HR-MS calculated for  $\text{C}_{10}\text{H}_{17}\text{N}$  ( $\text{M}^+\text{+H}$ ): 152.1439, found: 152.1444.

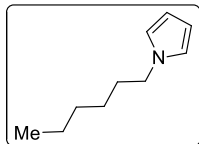

**1-Benzhydryl-1H-pyrrole<sup>1</sup> (2s).** Yield: 90% (0.115 g from 0.1 g); a white solid; mp 72-74  $^{\circ}\text{C}$ , (Lit. 70-74  $^{\circ}\text{C}$ );  $R_f = 0.38$  (Hexanes: EtOAc, 9:1, v/v); IR (neat)  $\nu_{max}$ : 880, 1214, 1356, 1578, 1625, 3042  $\text{cm}^{-1}$ .  $^1\text{H}$  NMR (400 MHz,  $\text{CDCl}_3$ ):  $\delta = 6.17$  (t,  $J = 2.0$  Hz, 2H), 6.44 (s, 1H), 6.59 (t,  $J = 2.0$  Hz, 2H), 7.05-7.07 (m, 4H), 7.26-7.31 (m, 6H);  $^{13}\text{C}$  NMR (100 MHz,  $\text{CDCl}_3$ ):  $\delta = 66.9, 108.4, 121.2, 127.9, 128.3, 128.6, 140.8$ . MS (ESI+):  $m/z = 234.1$ . ESI-HR-MS calculated for  $\text{C}_{17}\text{H}_{15}\text{N}$  ( $\text{M}^+\text{+H}$ ): 234.1283, found: 234.1285.

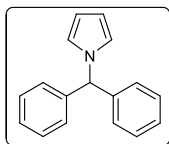

**7-Bromo-9H-benzo[e]pyrrolo[2,1-b][1,3]oxazine (3B).** Yield: 35% (0.043 g from 0.1 g); a dark brown solid; mp 126-128  $^{\circ}\text{C}$ ;  $R_f = 0.28$  (Hexanes: EtOAc, 9:1, v/v); IR (KBr)  $\nu_{max}$ : 916, 1240, 1598, 1625  $\text{cm}^{-1}$ .  $^1\text{H}$  NMR (400 MHz,  $\text{CDCl}_3$ ):  $\delta = 4.76$  (d,  $J = 15.5$  Hz, 1H), 4.91 (d,  $J = 15.3$  Hz, 1H), 6.84 (d,  $J = 8.8$  Hz, 2H), 7.52-7.61 (m, 4H);  $^{13}\text{C}$  NMR (100 MHz,  $\text{CDCl}_3$ ):  $\delta = 51.4, 108.5, 111.4, 119.8, 121.7, 132.2, 134.4, 135.6, 139.7, 147.7, 156.4$ . MS (ESI+):  $m/z = 250.1$ . ESI-HR-MS calculated for  $\text{C}_{11}\text{H}_8\text{BrNO}$  ( $\text{M}^+\text{+H}$ ): 249.9868, found: 249.9870.

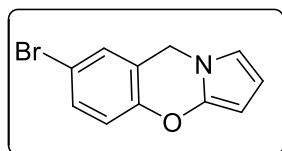

## References:

1. I. Deb, D. J. Coiro, D. Seidel, *Chem. Commun*, 2011, **47**, 6473.
2. V. Kumar, K. R. Rao. *Tetrahedron Lett.*, 2011, **52**, 3237.

# $^1\text{H}$ NMR and $^{13}\text{C}$ NMR Spectra of Compounds:

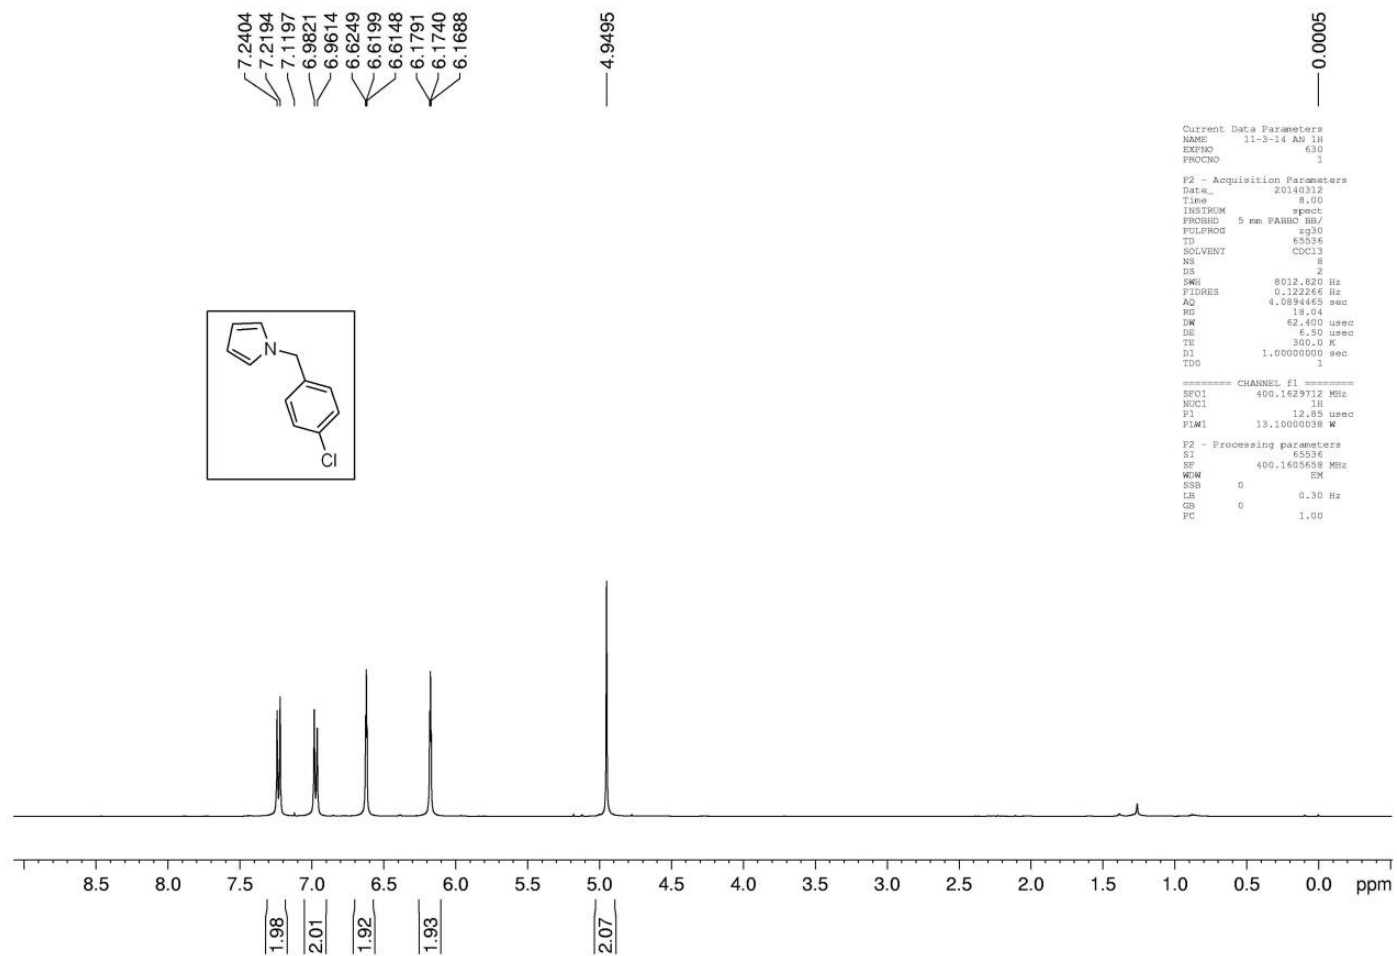

Fig: S-1  $^1\text{H}$ -NMR spectrum of 1-(4-Chlorobenzyl)-1H-pyrrole (2a).

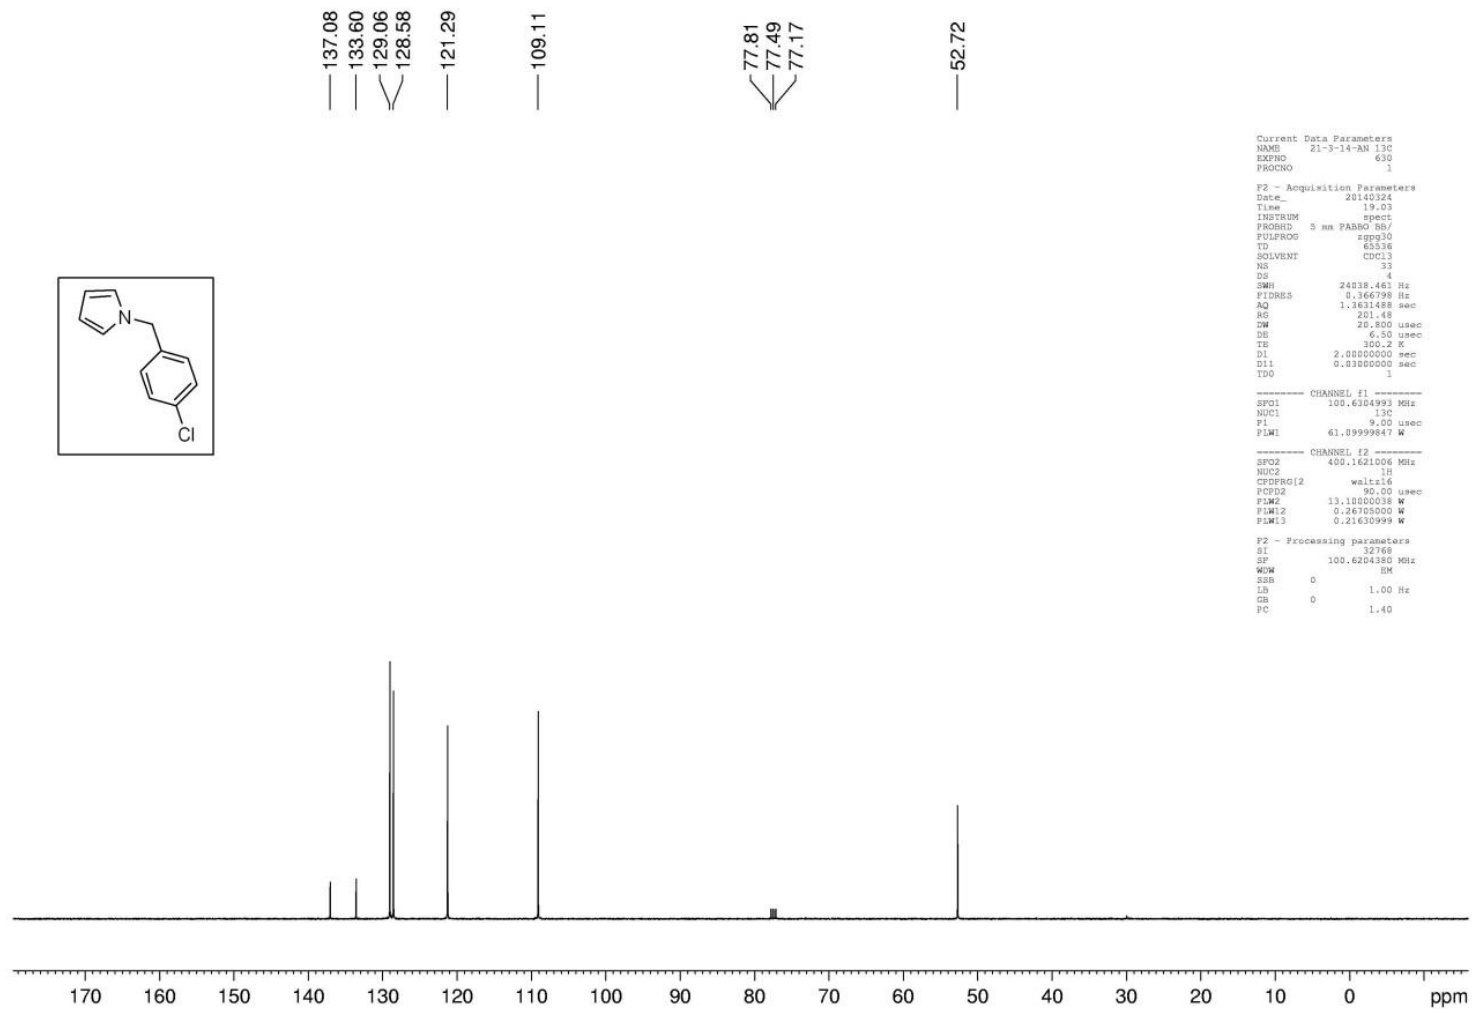

Fig: S-2 <sup>13</sup>C-NMR spectrum of 1-(4-Chlorobenzyl)-1H-pyrrole (2a).

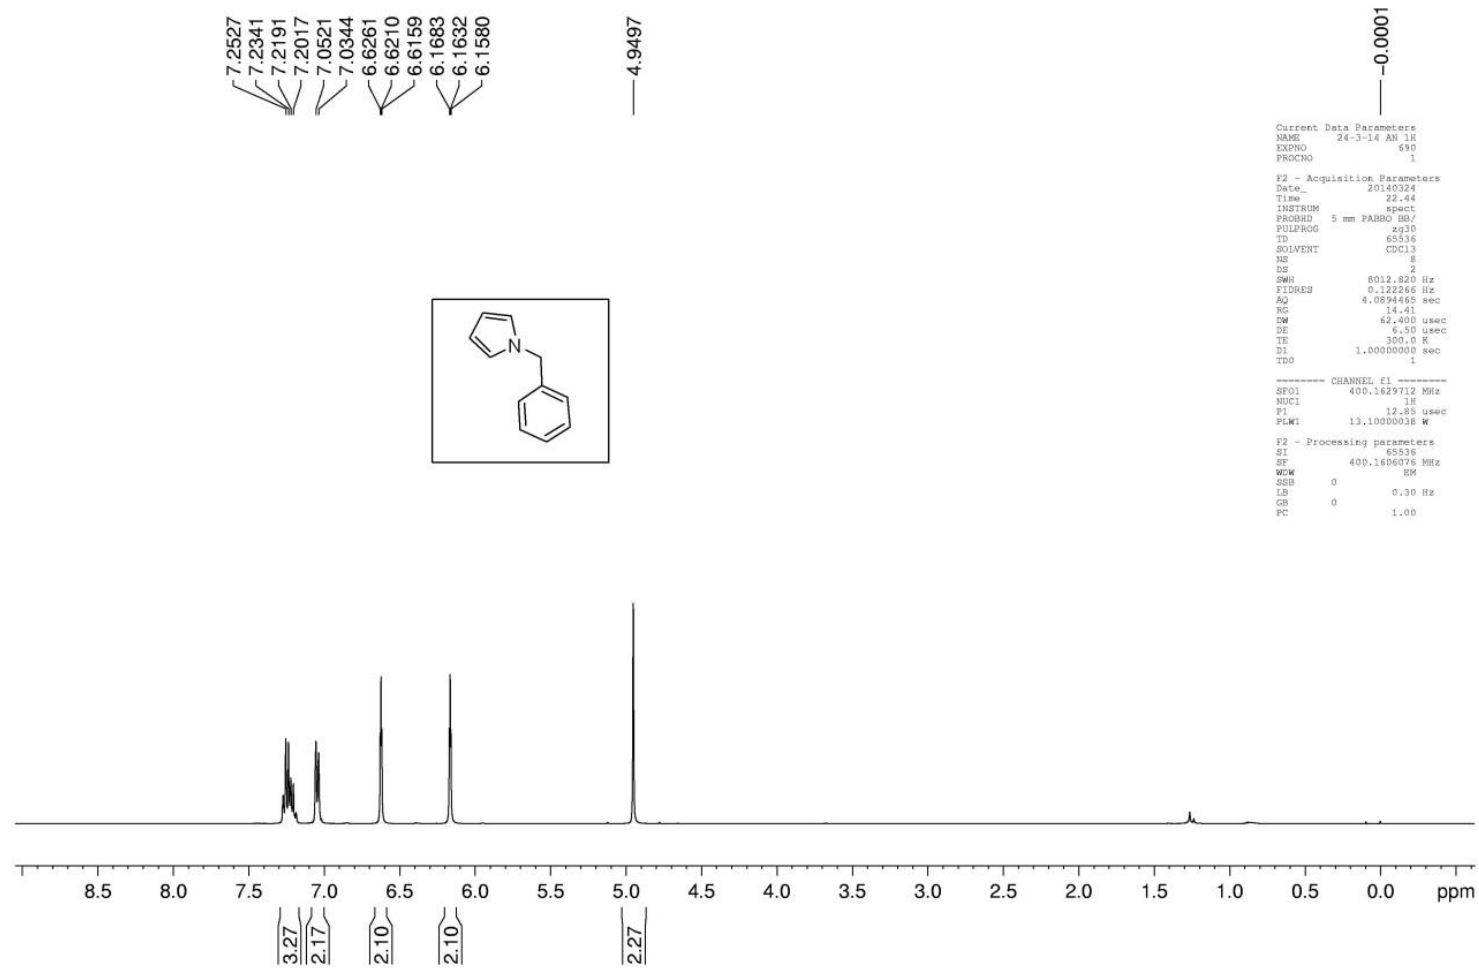

**Fig: S-3** <sup>1</sup>H-NMR spectrum of 1-Benzyl-1H-pyrrole (**2b**).



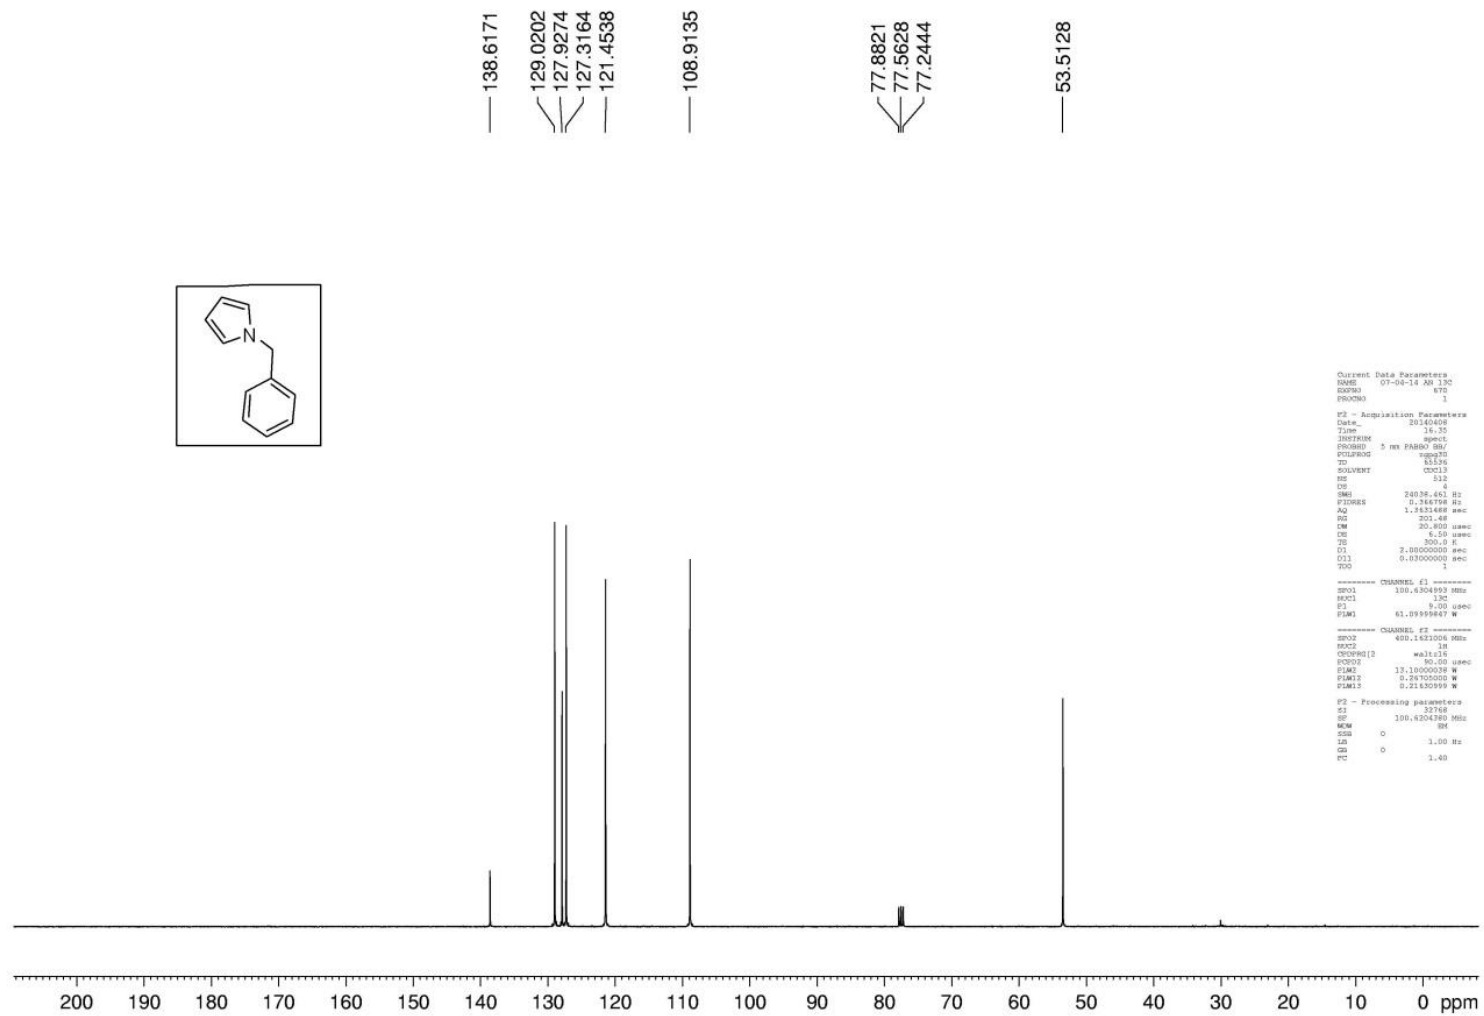

**Fig: S-4**  $^{13}\text{C}$ -NMR spectrum of 1-Benzyl-1H-pyrrole (**2b**).

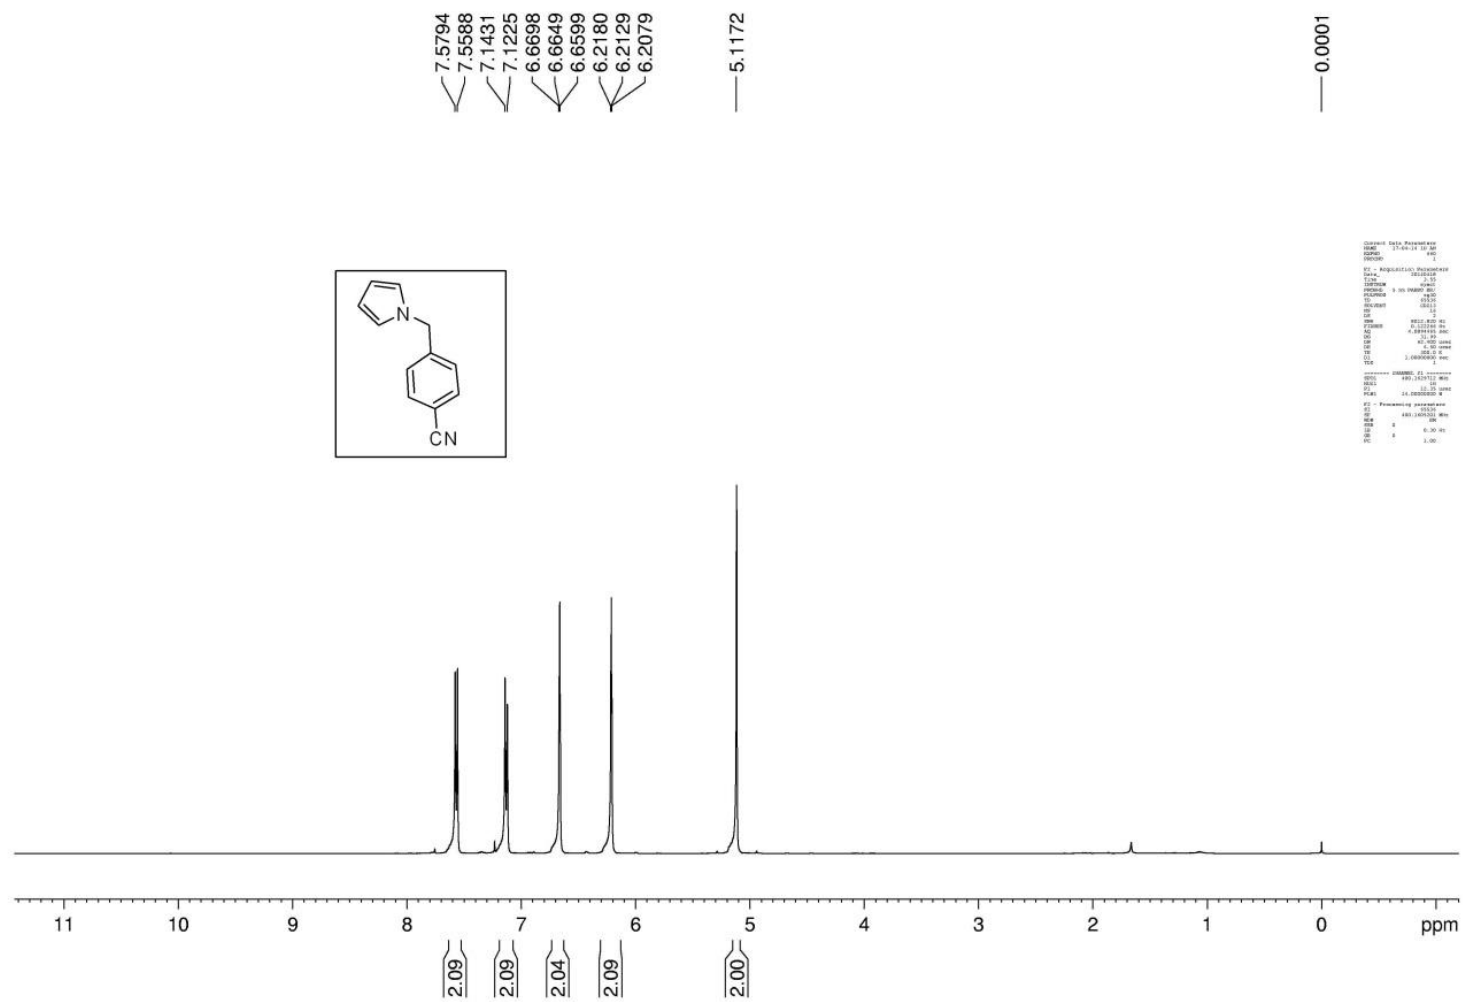

**Fig: S-5** <sup>1</sup>H-NMR spectrum of 4-((1H-pyrrol-1-yl)methyl)benzonitrile (**2c**).

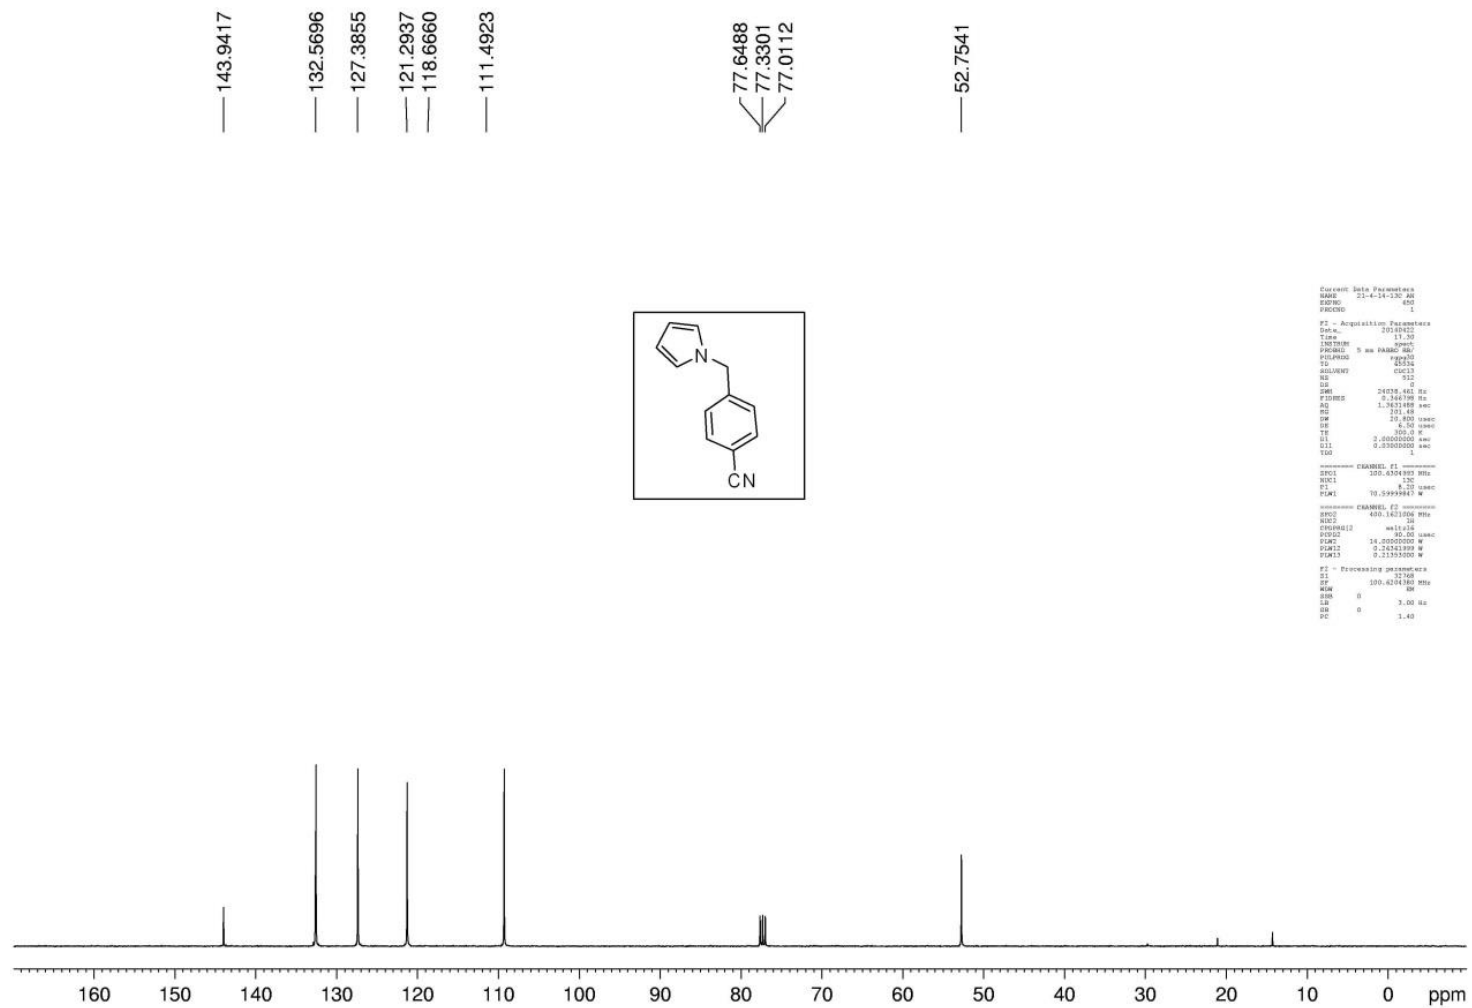

```

===== Data Parameters
NAME: 21-4-14-130-00
EXPNO: 4
PROCNO: 1

F2 - Acquisition Parameters
Date_: 20100211
Time: 11:30
INSTRUM: spect
PROBHD: 5 mm PABBO QNP
PULPROG: zgpg30
SOLVENT: DMSO
SOLVENT: DMSO
NS: 512
DS: 4
SWH: 20018.412 Hz
FIDRES: 0.14510 Hz
AQ: 1.2611489 sec
RG: 321.18
SQ: 20.830 sec
WDW: EM
SSB: 0
LB: 4.50 sec
TE: 300.2 K
D1: 2.0000000 sec
d11: 0.0300000 sec
TD: 65536

===== CHANNEL f1 =====
NUC1: 13C
P1: 12.00
PL1: 0.0000000 W

===== CHANNEL f2 =====
NUC2: 1H
P2: 12.00
PL2: 0.0000000 W

===== CHANNEL f3 =====
NUC3: 13C
P3: 12.00
PL3: 0.0000000 W

===== CHANNEL f4 =====
NUC4: 13C
P4: 12.00
PL4: 0.0000000 W

===== CHANNEL f5 =====
NUC5: 13C
P5: 12.00
PL5: 0.0000000 W

===== CHANNEL f6 =====
NUC6: 13C
P6: 12.00
PL6: 0.0000000 W

===== CHANNEL f7 =====
NUC7: 13C
P7: 12.00
PL7: 0.0000000 W

===== CHANNEL f8 =====
NUC8: 13C
P8: 12.00
PL8: 0.0000000 W

===== CHANNEL f9 =====
NUC9: 13C
P9: 12.00
PL9: 0.0000000 W

===== CHANNEL f10 =====
NUC10: 13C
P10: 12.00
PL10: 0.0000000 W

===== CHANNEL f11 =====
NUC11: 13C
P11: 12.00
PL11: 0.0000000 W

===== CHANNEL f12 =====
NUC12: 13C
P12: 12.00
PL12: 0.0000000 W

===== CHANNEL f13 =====
NUC13: 13C
P13: 12.00
PL13: 0.0000000 W

===== CHANNEL f14 =====
NUC14: 13C
P14: 12.00
PL14: 0.0000000 W

===== CHANNEL f15 =====
NUC15: 13C
P15: 12.00
PL15: 0.0000000 W

===== CHANNEL f16 =====
NUC16: 13C
P16: 12.00
PL16: 0.0000000 W

===== CHANNEL f17 =====
NUC17: 13C
P17: 12.00
PL17: 0.0000000 W

===== CHANNEL f18 =====
NUC18: 13C
P18: 12.00
PL18: 0.0000000 W

===== CHANNEL f19 =====
NUC19: 13C
P19: 12.00
PL19: 0.0000000 W

===== CHANNEL f20 =====
NUC20: 13C
P20: 12.00
PL20: 0.0000000 W

===== CHANNEL f21 =====
NUC21: 13C
P21: 12.00
PL21: 0.0000000 W

===== CHANNEL f22 =====
NUC22: 13C
P22: 12.00
PL22: 0.0000000 W

===== CHANNEL f23 =====
NUC23: 13C
P23: 12.00
PL23: 0.0000000 W

===== CHANNEL f24 =====
NUC24: 13C
P24: 12.00
PL24: 0.0000000 W

===== CHANNEL f25 =====
NUC25: 13C
P25: 12.00
PL25: 0.0000000 W

===== CHANNEL f26 =====
NUC26: 13C
P26: 12.00
PL26: 0.0000000 W

===== CHANNEL f27 =====
NUC27: 13C
P27: 12.00
PL27: 0.0000000 W

===== CHANNEL f28 =====
NUC28: 13C
P28: 12.00
PL28: 0.0000000 W

===== CHANNEL f29 =====
NUC29: 13C
P29: 12.00
PL29: 0.0000000 W

===== CHANNEL f30 =====
NUC30: 13C
P30: 12.00
PL30: 0.0000000 W

===== CHANNEL f31 =====
NUC31: 13C
P31: 12.00
PL31: 0.0000000 W

===== CHANNEL f32 =====
NUC32: 13C
P32: 12.00
PL32: 0.0000000 W

===== CHANNEL f33 =====
NUC33: 13C
P33: 12.00
PL33: 0.0000000 W

===== CHANNEL f34 =====
NUC34: 13C
P34: 12.00
PL34: 0.0000000 W

===== CHANNEL f35 =====
NUC35: 13C
P35: 12.00
PL35: 0.0000000 W

===== CHANNEL f36 =====
NUC36: 13C
P36: 12.00
PL36: 0.0000000 W

===== CHANNEL f37 =====
NUC37: 13C
P37: 12.00
PL37: 0.0000000 W

===== CHANNEL f38 =====
NUC38: 13C
P38: 12.00
PL38: 0.0000000 W

===== CHANNEL f39 =====
NUC39: 13C
P39: 12.00
PL39: 0.0000000 W

===== CHANNEL f40 =====
NUC40: 13C
P40: 12.00
PL40: 0.0000000 W

===== CHANNEL f41 =====
NUC41: 13C
P41: 12.00
PL41: 0.0000000 W

===== CHANNEL f42 =====
NUC42: 13C
P42: 12.00
PL42: 0.0000000 W

===== CHANNEL f43 =====
NUC43: 13C
P43: 12.00
PL43: 0.0000000 W

===== CHANNEL f44 =====
NUC44: 13C
P44: 12.00
PL44: 0.0000000 W

===== CHANNEL f45 =====
NUC45: 13C
P45: 12.00
PL45: 0.0000000 W

===== CHANNEL f46 =====
NUC46: 13C
P46: 12.00
PL46: 0.0000000 W

===== CHANNEL f47 =====
NUC47: 13C
P47: 12.00
PL47: 0.0000000 W

===== CHANNEL f48 =====
NUC48: 13C
P48: 12.00
PL48: 0.0000000 W

===== CHANNEL f49 =====
NUC49: 13C
P49: 12.00
PL49: 0.0000000 W

===== CHANNEL f50 =====
NUC50: 13C
P50: 12.00
PL50: 0.0000000 W

===== CHANNEL f51 =====
NUC51: 13C
P51: 12.00
PL51: 0.0000000 W

===== CHANNEL f52 =====
NUC52: 13C
P52: 12.00
PL52: 0.0000000 W

===== CHANNEL f53 =====
NUC53: 13C
P53: 12.00
PL53: 0.0000000 W

===== CHANNEL f54 =====
NUC54: 13C
P54: 12.00
PL54: 0.0000000 W

===== CHANNEL f55 =====
NUC55: 13C
P55: 12.00
PL55: 0.0000000 W

===== CHANNEL f56 =====
NUC56: 13C
P56: 12.00
PL56: 0.0000000 W

===== CHANNEL f57 =====
NUC57: 13C
P57: 12.00
PL57: 0.0000000 W

===== CHANNEL f58 =====
NUC58: 13C
P58: 12.00
PL58: 0.0000000 W

===== CHANNEL f59 =====
NUC59: 13C
P59: 12.00
PL59: 0.0000000 W

===== CHANNEL f60 =====
NUC60: 13C
P60: 12.00
PL60: 0.0000000 W

===== CHANNEL f61 =====
NUC61: 13C
P61: 12.00
PL61: 0.0000000 W

===== CHANNEL f62 =====
NUC62: 13C
P62: 12.00
PL62: 0.0000000 W

===== CHANNEL f63 =====
NUC63: 13C
P63: 12.00
PL63: 0.0000000 W

===== CHANNEL f64 =====
NUC64: 13C
P64: 12.00
PL64: 0.0000000 W

===== CHANNEL f65 =====
NUC65: 13C
P65: 12.00
PL65: 0.0000000 W

===== CHANNEL f66 =====
NUC66: 13C
P66: 12.00
PL66: 0.0000000 W

===== CHANNEL f67 =====
NUC67: 13C
P67: 12.00
PL67: 0.0000000 W

===== CHANNEL f68 =====
NUC68: 13C
P68: 12.00
PL68: 0.0000000 W

===== CHANNEL f69 =====
NUC69: 13C
P69: 12.00
PL69: 0.0000000 W

===== CHANNEL f70 =====
NUC70: 13C
P70: 12.00
PL70: 0.0000000 W

===== CHANNEL f71 =====
NUC71: 13C
P71: 12.00
PL71: 0.0000000 W

===== CHANNEL f72 =====
NUC72: 13C
P72: 12.00
PL72: 0.0000000 W

===== CHANNEL f73 =====
NUC73: 13C
P73: 12.00
PL73: 0.0000000 W

===== CHANNEL f74 =====
NUC74: 13C
P74: 12.00
PL74: 0.0000000 W

===== CHANNEL f75 =====
NUC75: 13C
P75: 12.00
PL75: 0.0000000 W

===== CHANNEL f76 =====
NUC76: 13C
P76: 12.00
PL76: 0.0000000 W

===== CHANNEL f77 =====
NUC77: 13C
P77: 12.00
PL77: 0.0000000 W

===== CHANNEL f78 =====
NUC78: 13C
P78: 12.00
PL78: 0.0000000 W

===== CHANNEL f79 =====
NUC79: 13C
P79: 12.00
PL79: 0.0000000 W

===== CHANNEL f80 =====
NUC80: 13C
P80: 12.00
PL80: 0.0000000 W

===== CHANNEL f81 =====
NUC81: 13C
P81: 12.00
PL81: 0.0000000 W

===== CHANNEL f82 =====
NUC82: 13C
P82: 12.00
PL82: 0.0000000 W

===== CHANNEL f83 =====
NUC83: 13C
P83: 12.00
PL83: 0.0000000 W

===== CHANNEL f84 =====
NUC84: 13C
P84: 12.00
PL84: 0.0000000 W

===== CHANNEL f85 =====
NUC85: 13C
P85: 12.00
PL85: 0.0000000 W

===== CHANNEL f86 =====
NUC86: 13C
P86: 12.00
PL86: 0.0000000 W

===== CHANNEL f87 =====
NUC87: 13C
P87: 12.00
PL87: 0.0000000 W

===== CHANNEL f88 =====
NUC88: 13C
P88: 12.00
PL88: 0.0000000 W

===== CHANNEL f89 =====
NUC89: 13C
P89: 12.00
PL89: 0.0000000 W

===== CHANNEL f90 =====
NUC90: 13C
P90: 12.00
PL90: 0.0000000 W

===== CHANNEL f91 =====
NUC91: 13C
P91: 12.00
PL91: 0.0000000 W

===== CHANNEL f92 =====
NUC92: 13C
P92: 12.00
PL92: 0.0000000 W

===== CHANNEL f93 =====
NUC93: 13C
P93: 12.00
PL93: 0.0000000 W

===== CHANNEL f94 =====
NUC94: 13C
P94: 12.00
PL94: 0.0000000 W

===== CHANNEL f95 =====
NUC95: 13C
P95: 12.00
PL95: 0.0000000 W

===== CHANNEL f96 =====
NUC96: 13C
P96: 12.00
PL96: 0.0000000 W

===== CHANNEL f97 =====
NUC97: 13C
P97: 12.00
PL97: 0.0000000 W

===== CHANNEL f98 =====
NUC98: 13C
P98: 12.00
PL98: 0.0000000 W

===== CHANNEL f99 =====
NUC99: 13C
P99: 12.00
PL99: 0.0000000 W

===== CHANNEL f100 =====
NUC100: 13C
P100: 12.00
PL100: 0.0000000 W

```

Fig: S-6 <sup>13</sup>C-NMR spectrum of 4-((1H-pyrrol-1-yl)methyl)benzotrile (2c).

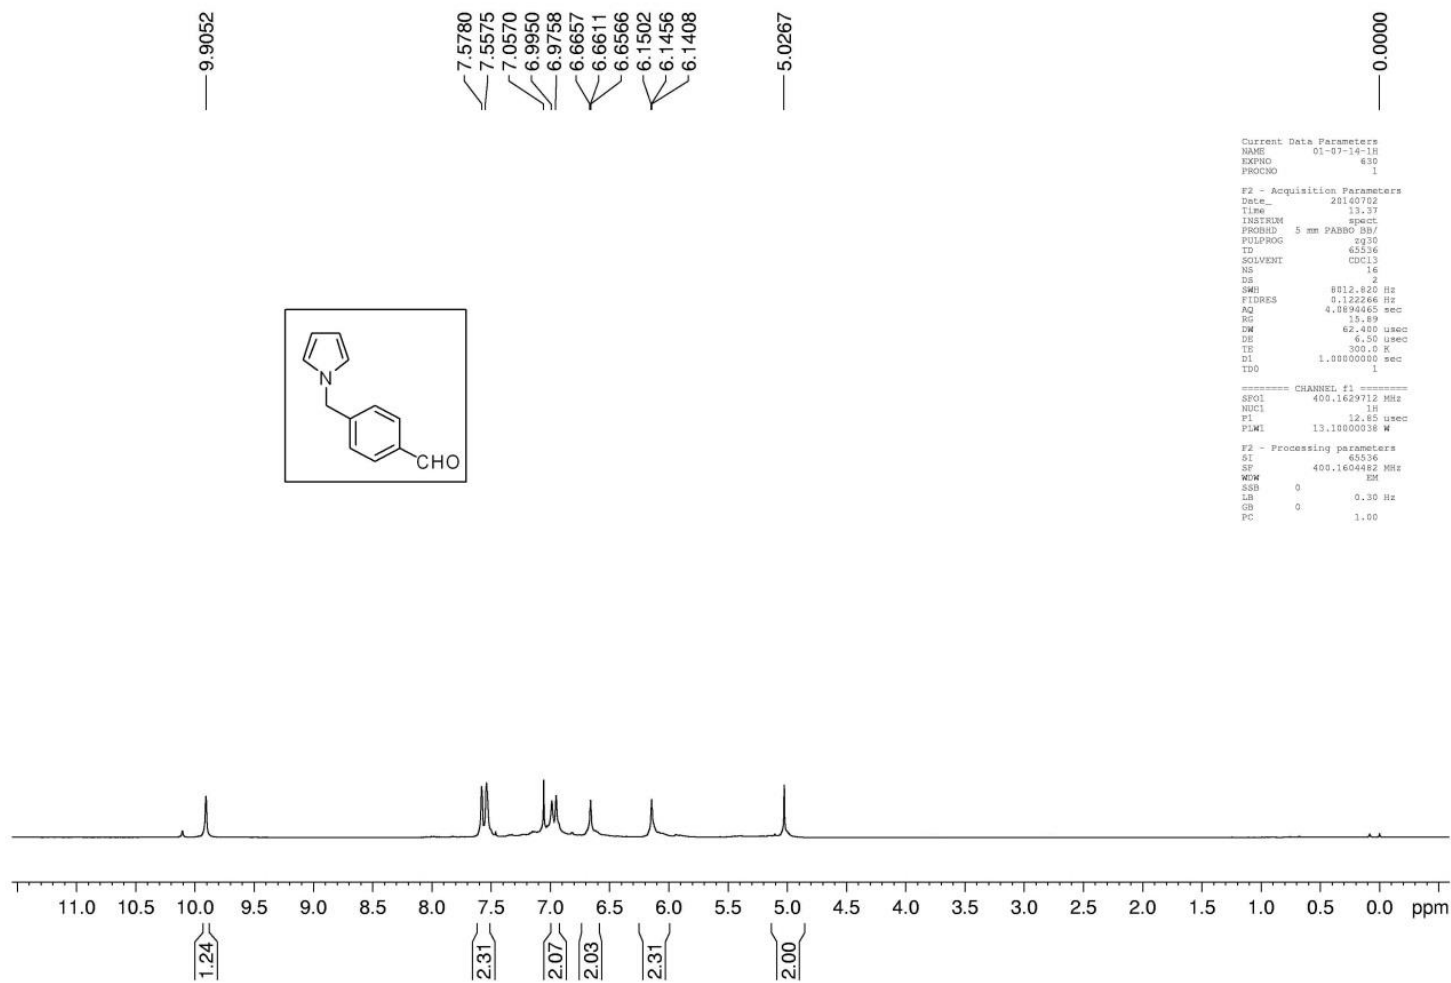

**Fig: S-7**  $^1\text{H-NMR}$  spectrum of 4-((1H-pyrrol-1-yl)methyl)benzaldehyde (**2d**).

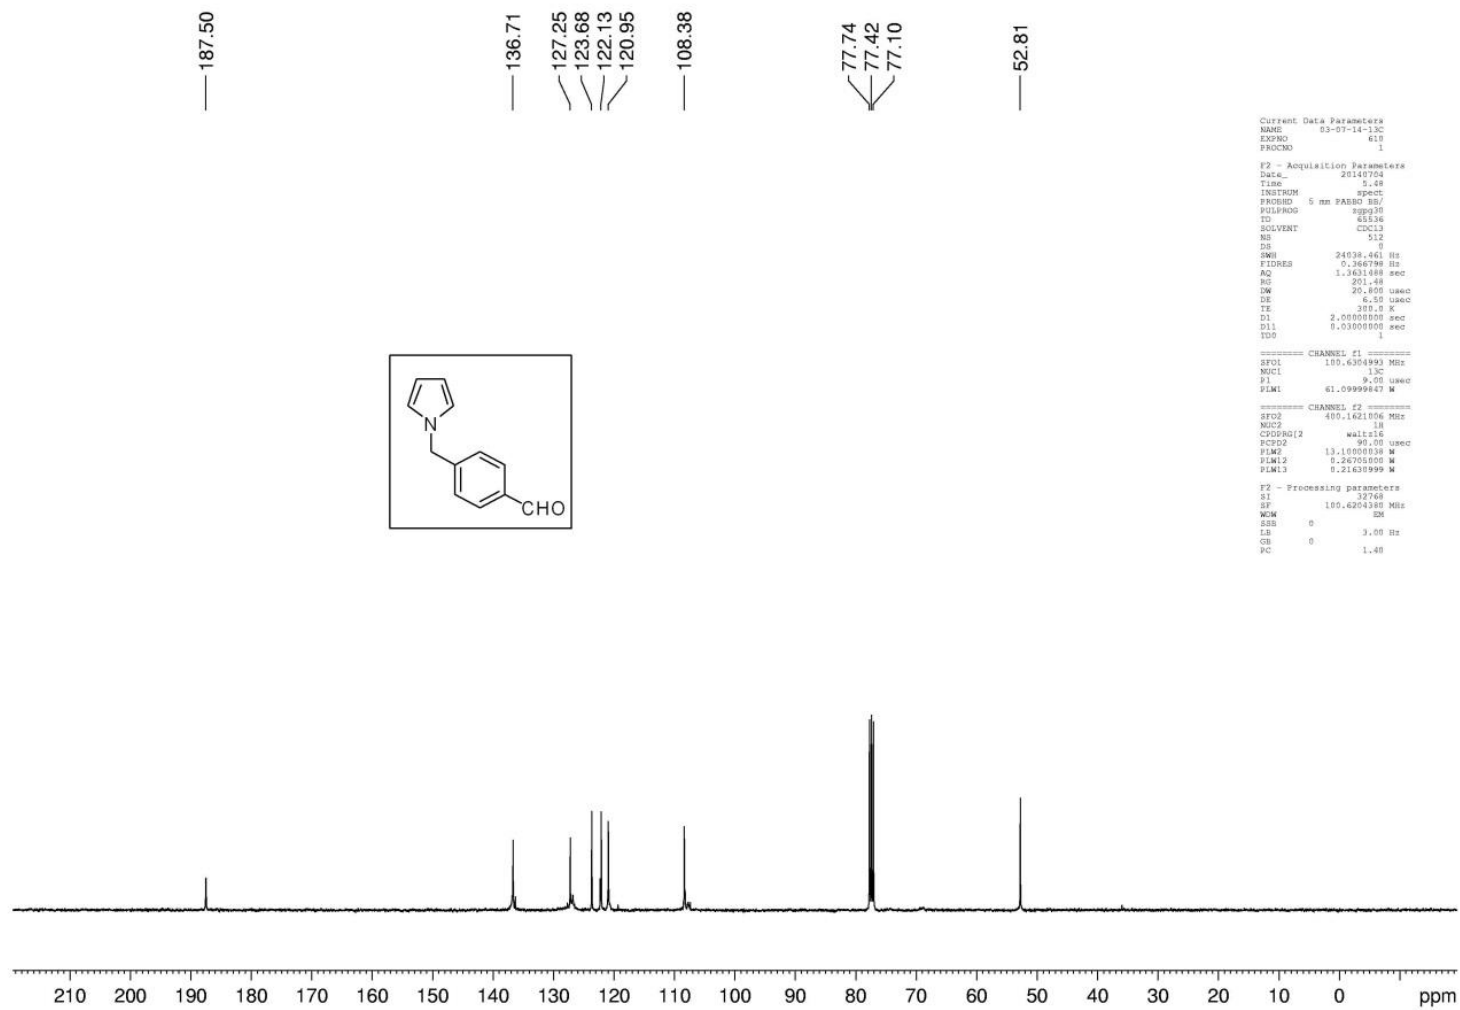

**Fig: S-8** <sup>13</sup>C-NMR spectrum of 4-((1H-pyrrol-1-yl)methyl)benzaldehyde (**2d**).

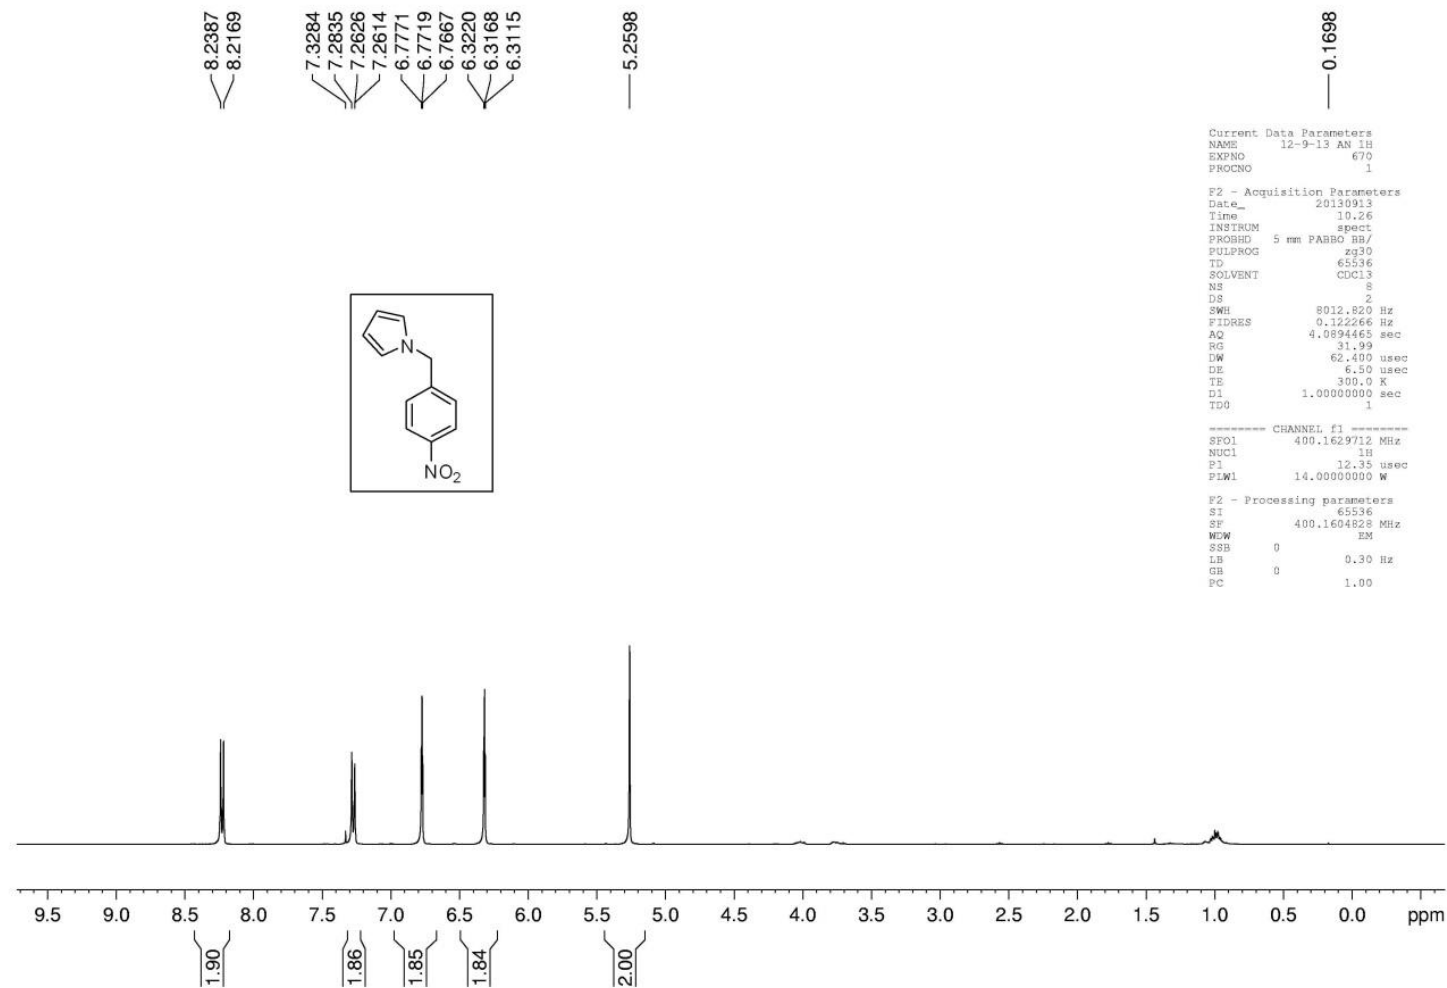

**Fig: S-9** <sup>1</sup>H-NMR spectrum of 1-(4-nitrobenzyl)-1H-pyrrole (**2e**).

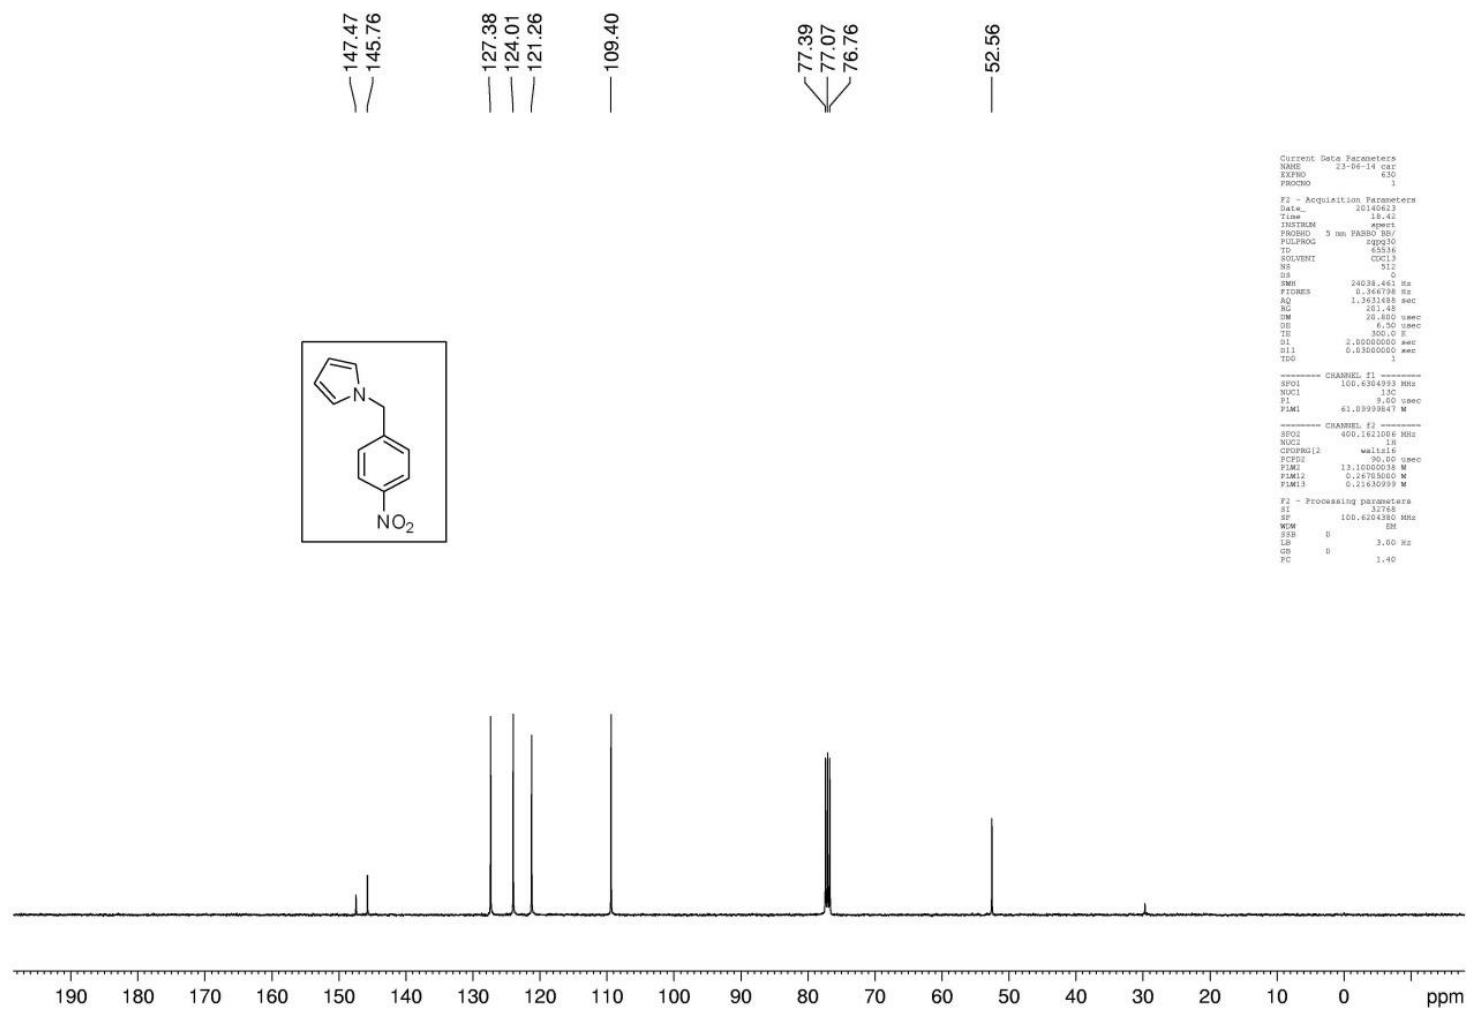

**Fig: S-10** <sup>13</sup>C-NMR spectrum of 1-(4-nitrobenzyl)-1H-pyrrole (**2e**).

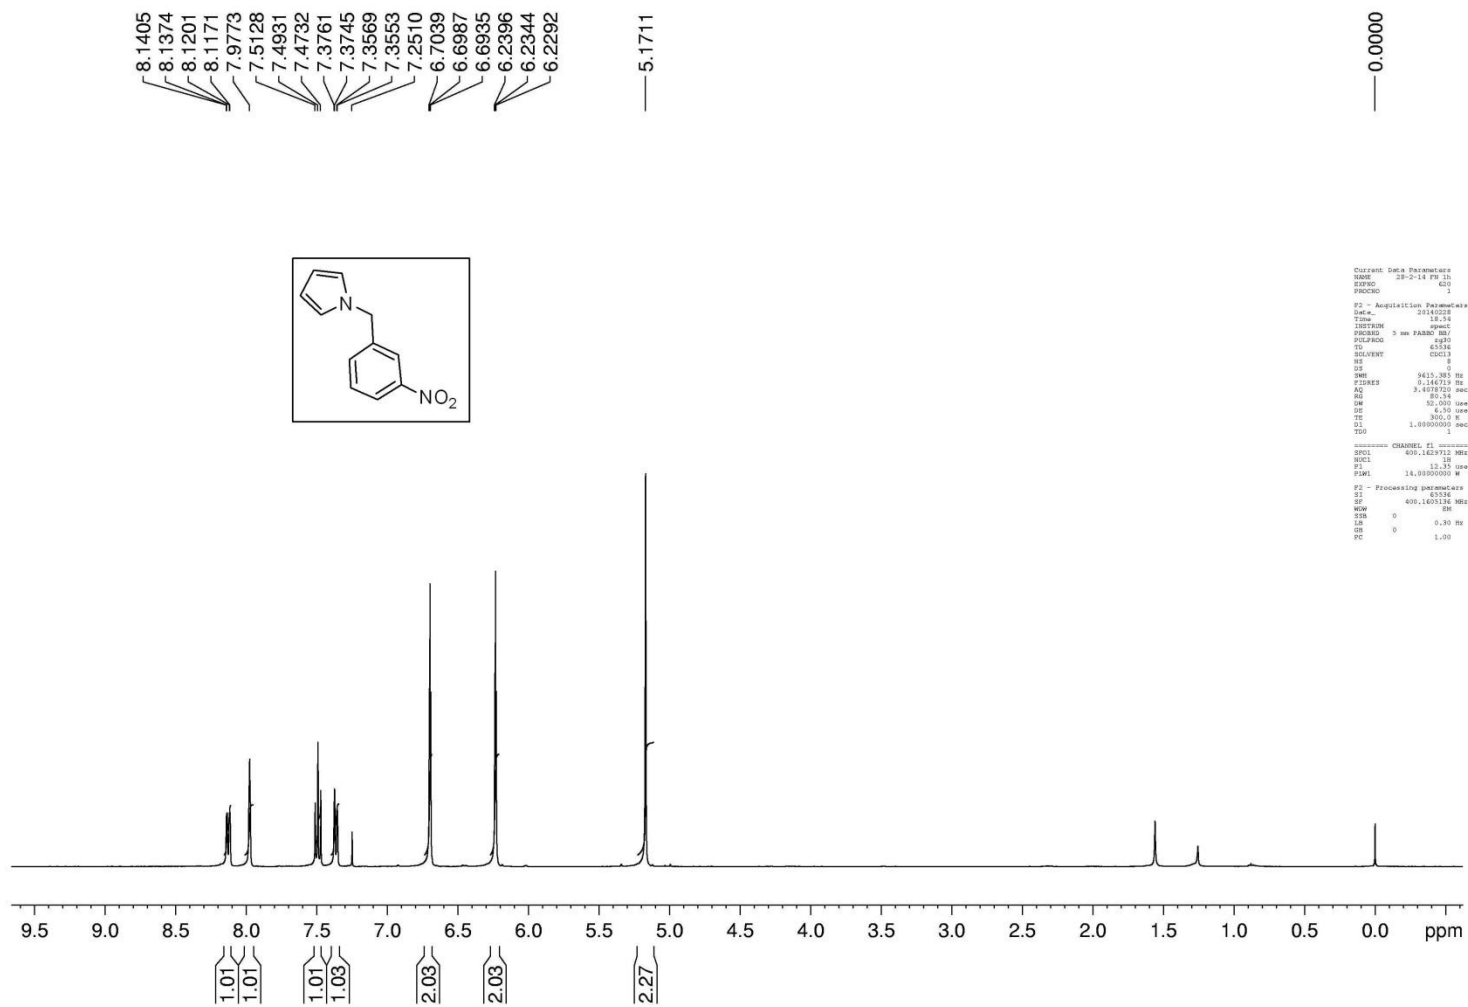

Fig: S-11 <sup>1</sup>H-NMR spectrum of 1-(3-Nitrobenzyl)-1H-pyrrole (2f).



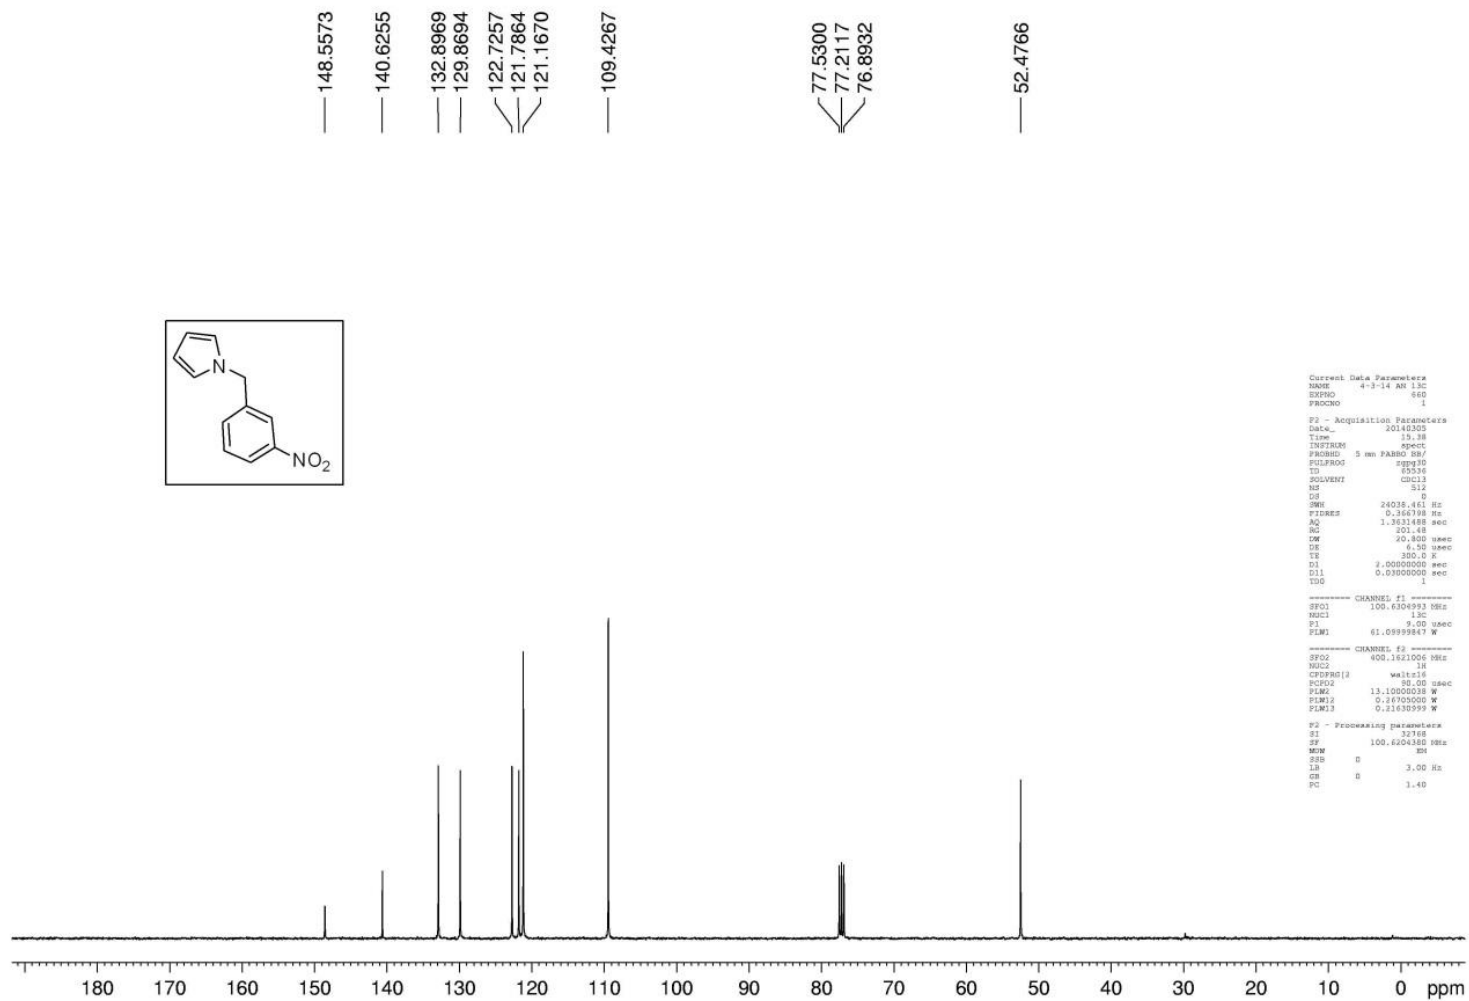

Fig: S-12 <sup>13</sup>C-NMR spectrum of 1-(3-Nitrobenzyl)-1H-pyrrole (2f).

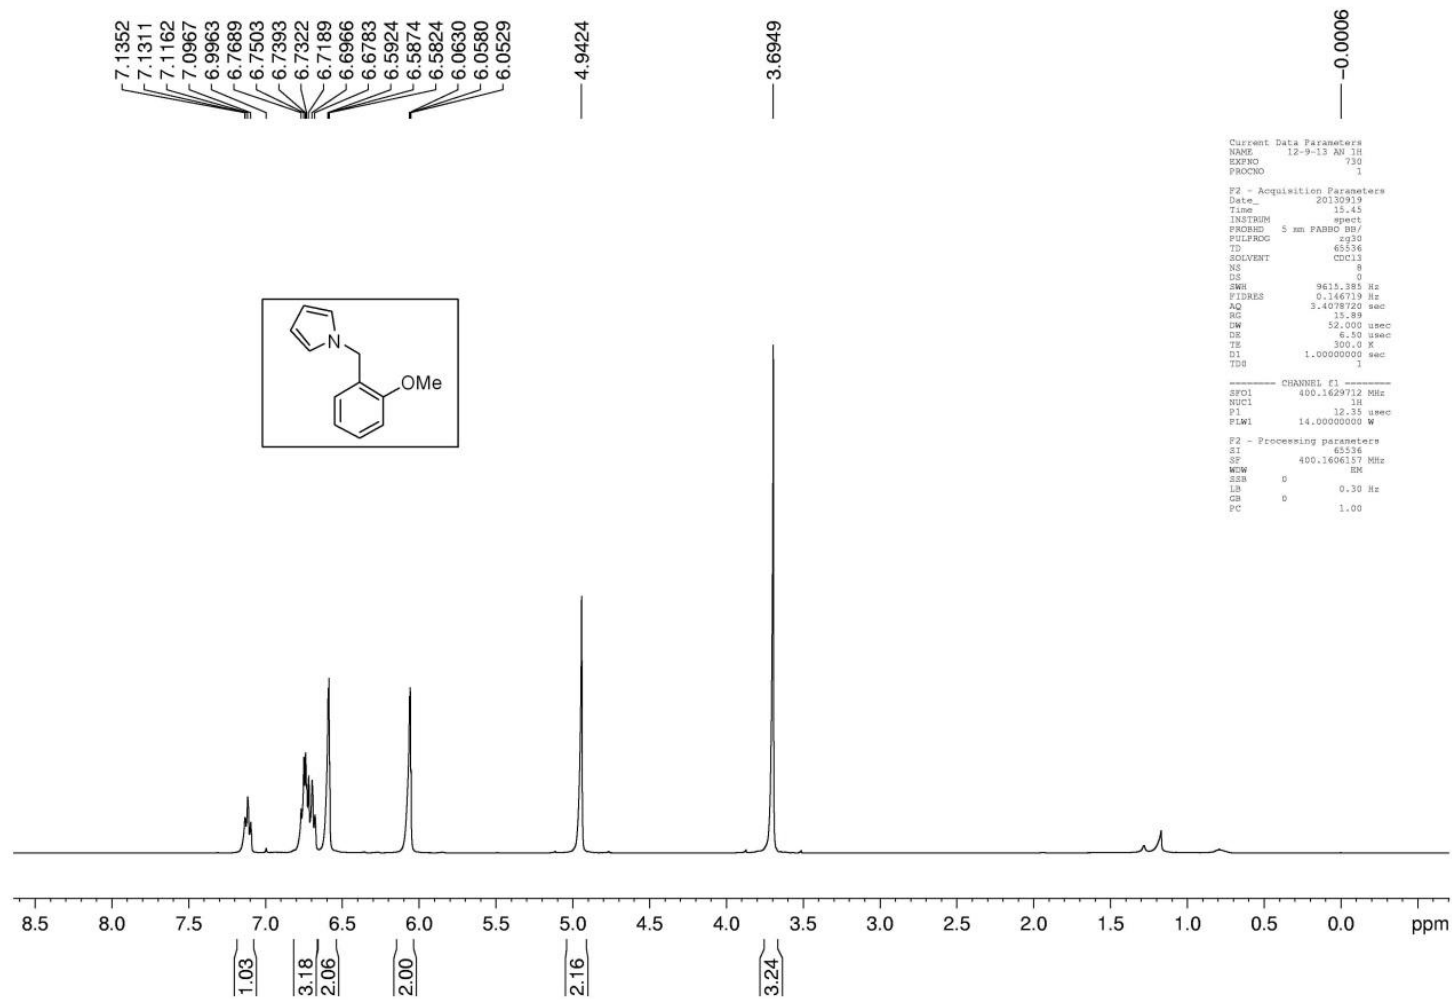

Fig: S-13 <sup>1</sup>H-NMR spectrum of 1-(2-Methoxybenzyl)-1H-pyrrole (2g).

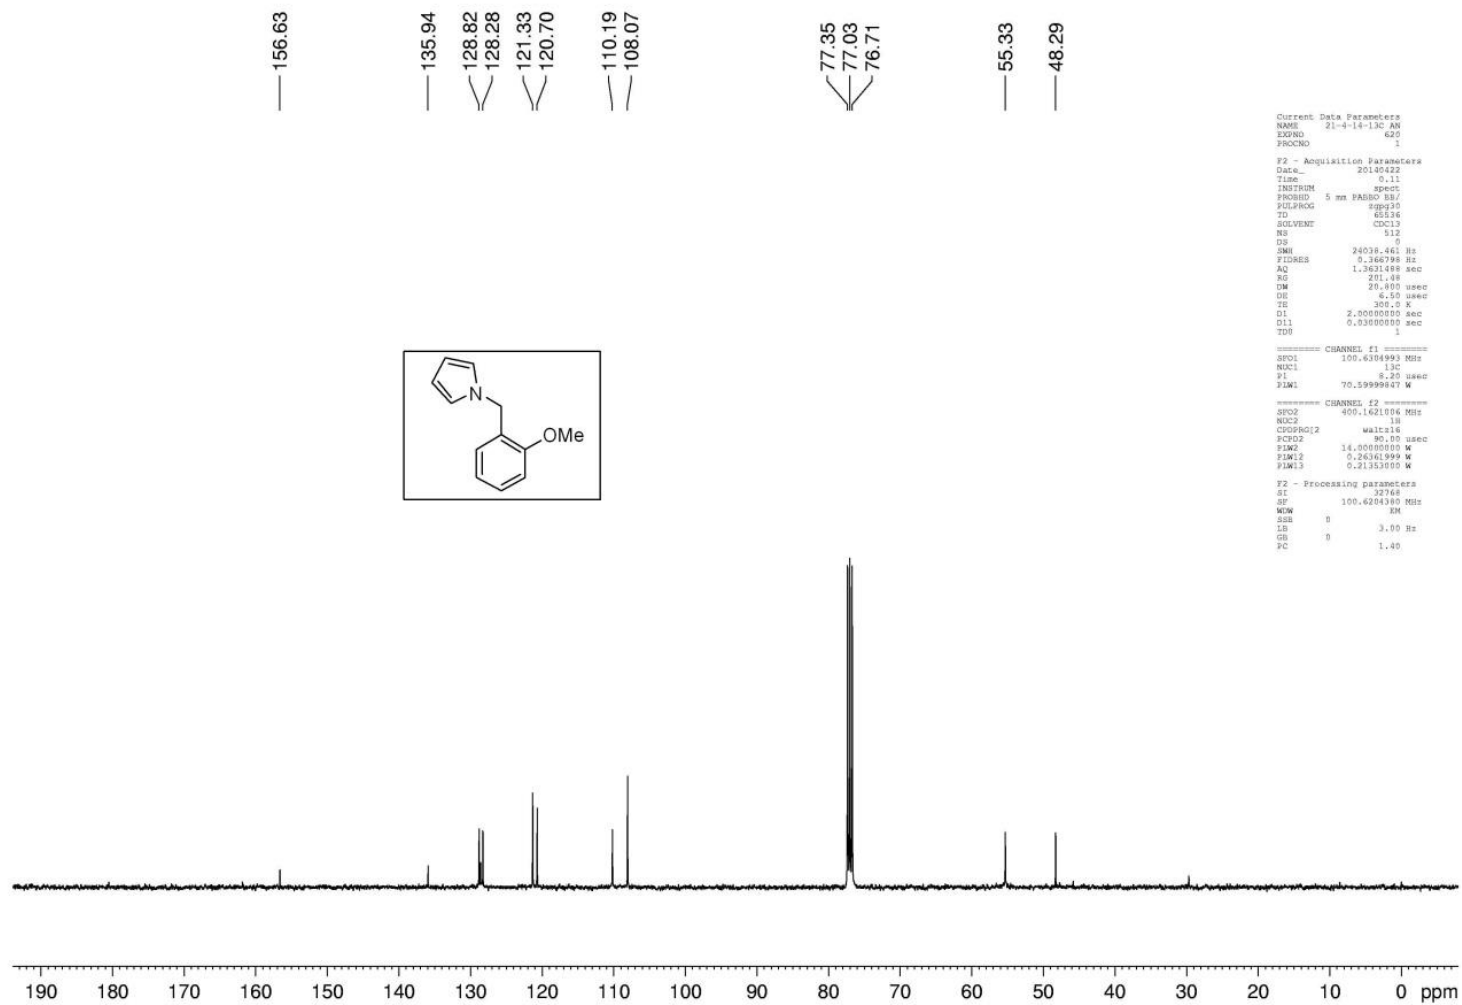

**Fig: S-14**  $^{13}\text{C}$ -NMR spectrum of 1-(2-Methoxybenzyl)-1H-pyrrole (2g).

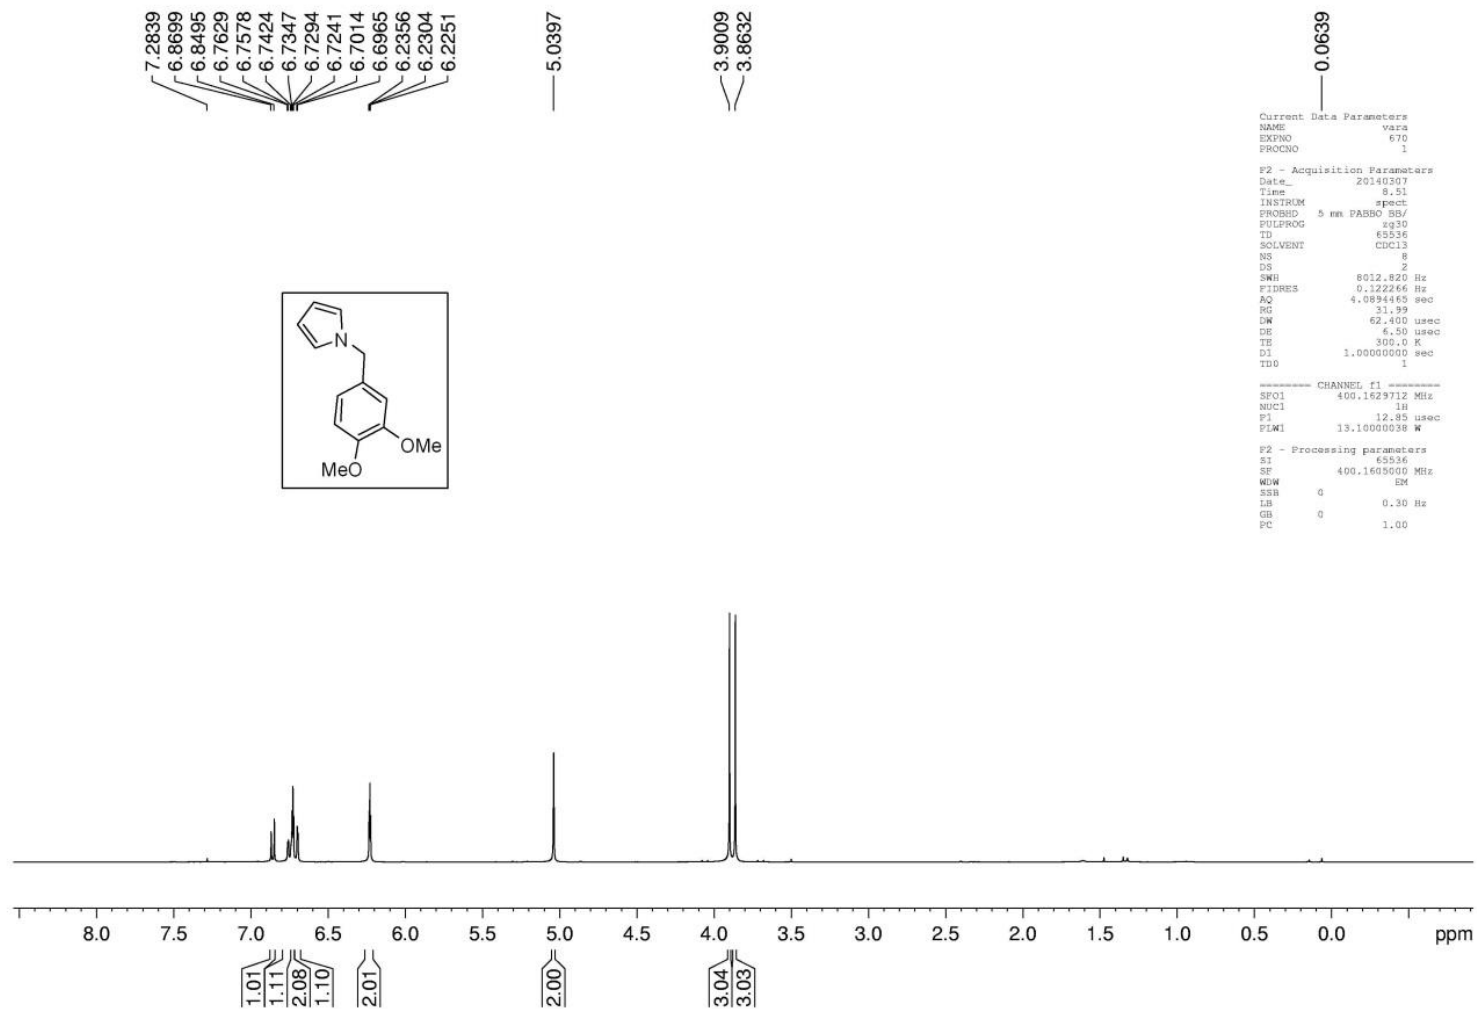

**Fig: S-15**  $^1\text{H}$ -NMR spectrum of 1-(3,4-Dimethoxybenzyl)-1H-pyrrole (**2h**).

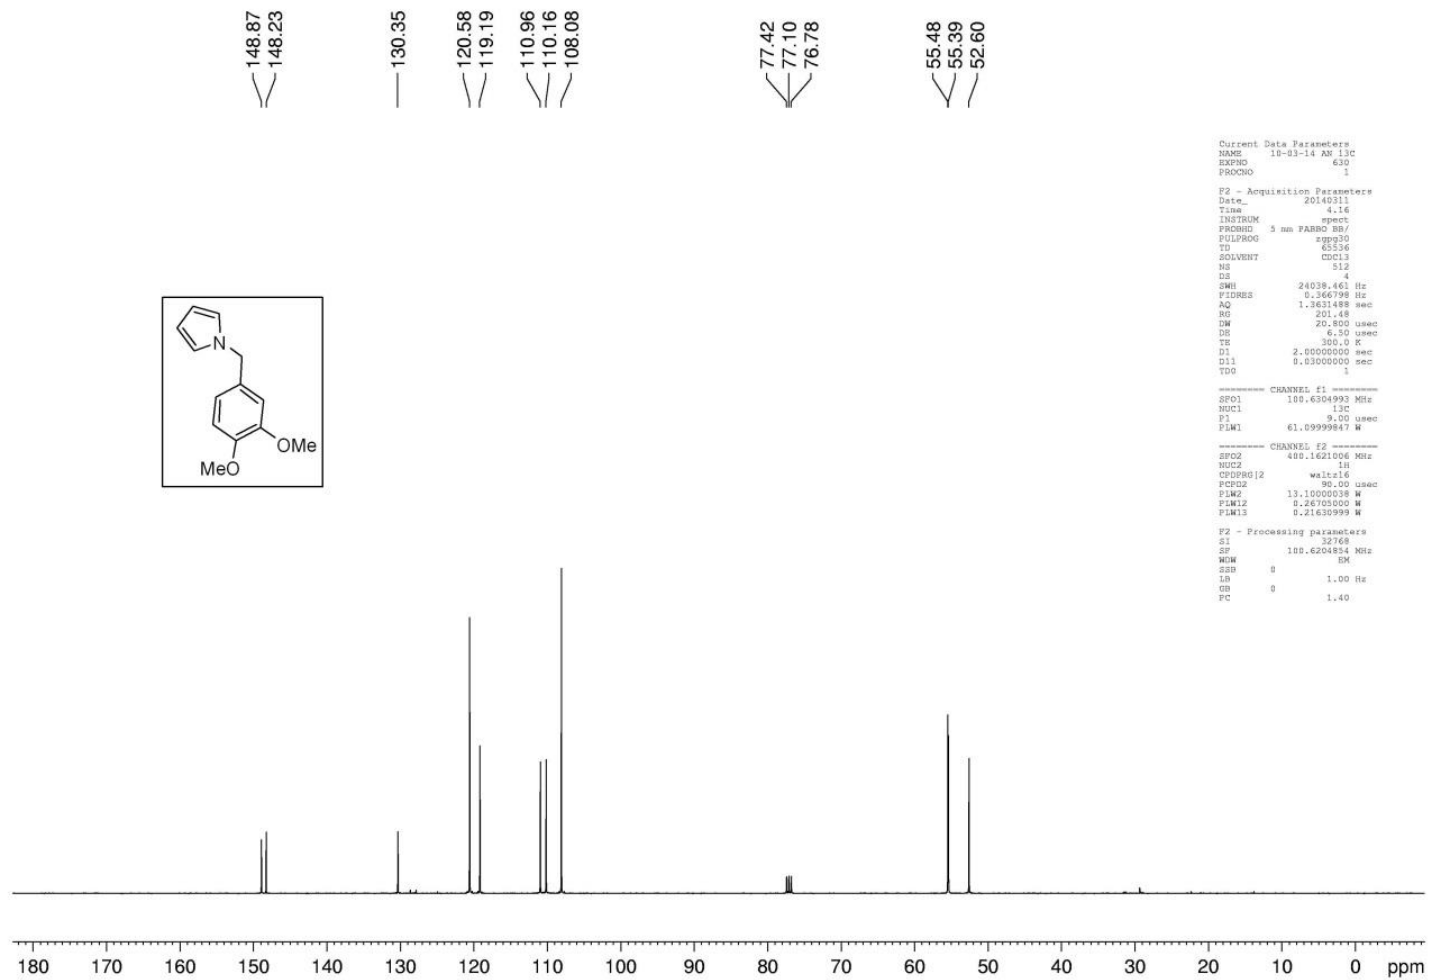

**Fig: S-16**  $^{13}\text{C}$ -NMR spectrum of 1-(3,4-Dimethoxybenzyl)-1H-pyrrole (**2h**).

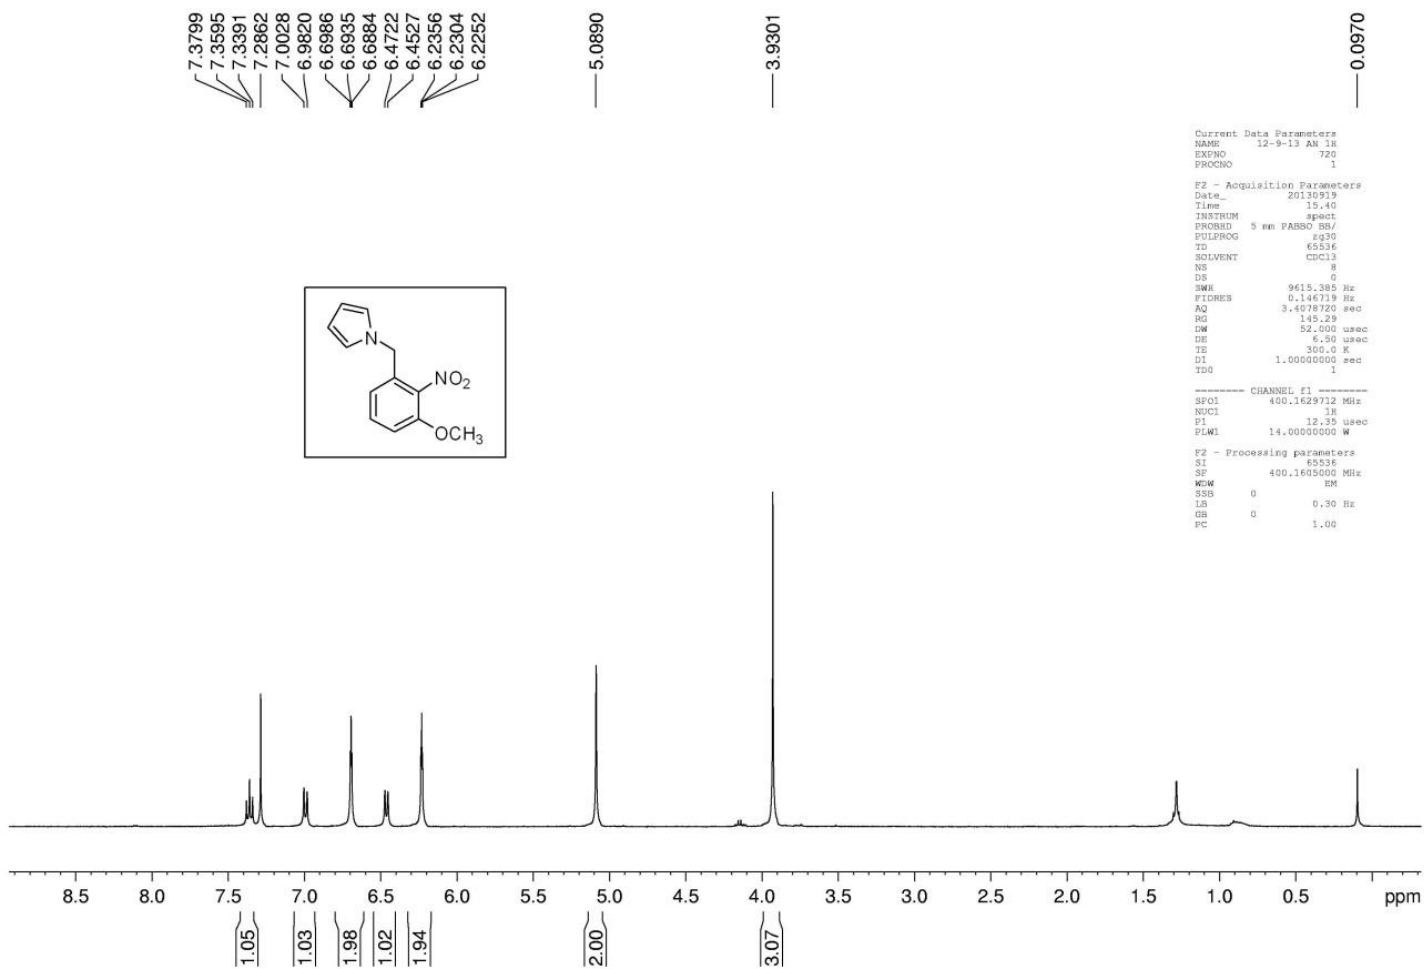

**Fig: S-17**  $^1\text{H}$ -NMR spectrum of 1-(3-Methoxy-2-nitrobenzyl)-1H-pyrrole (**2i**).

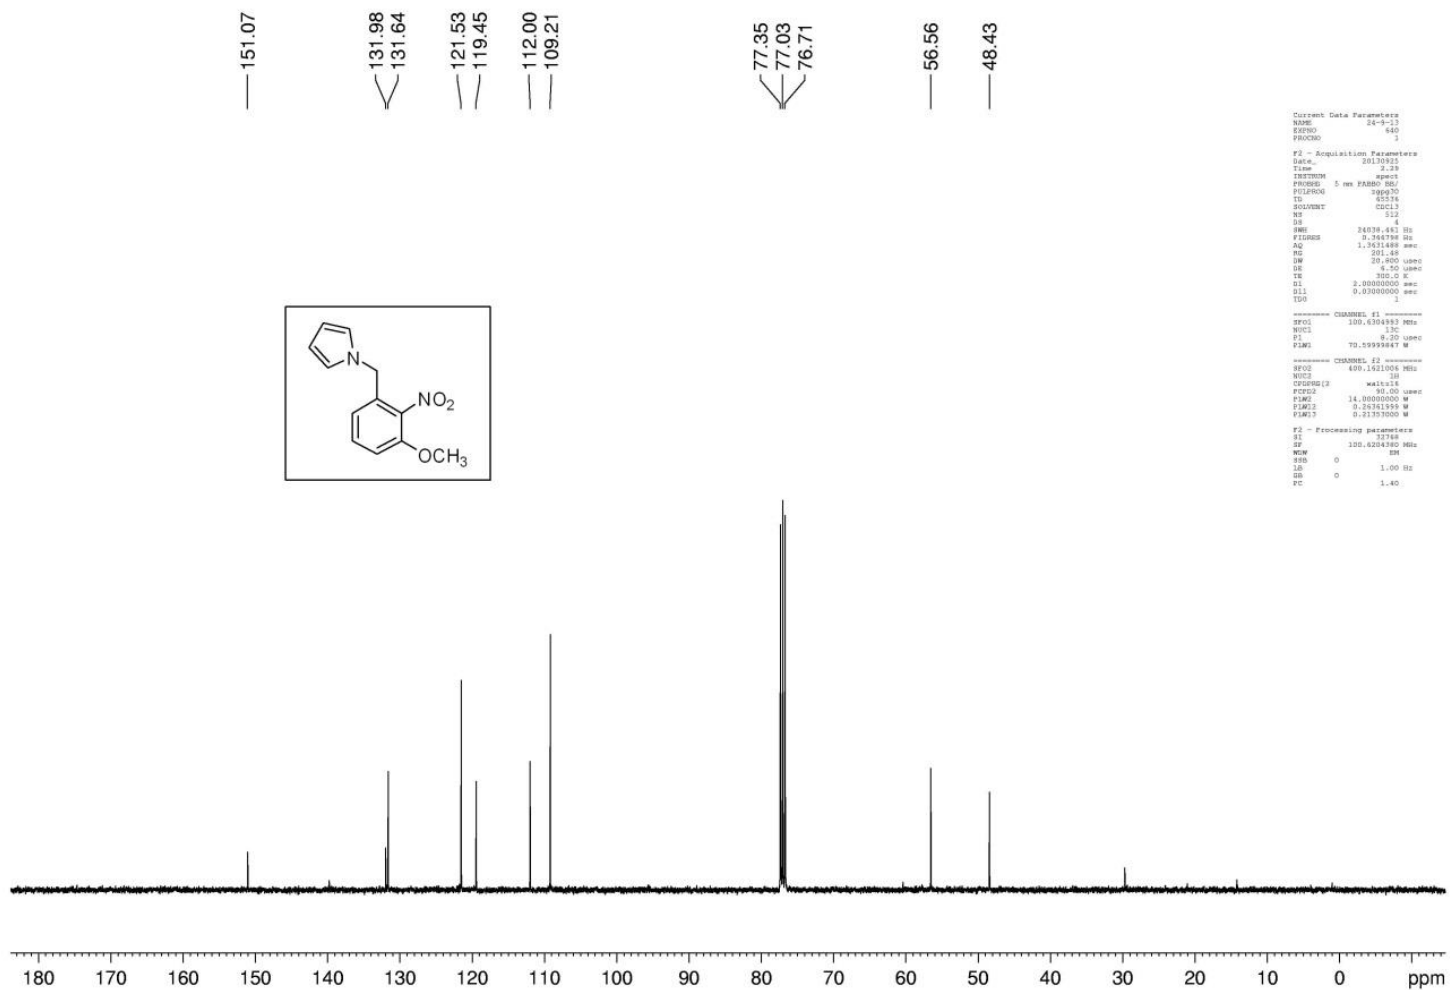

**Fig: S-18**  $^{13}\text{C}$ -NMR spectrum of 1-(3-Methoxy-2-nitrobenzyl)-1H-pyrrole (**2i**).

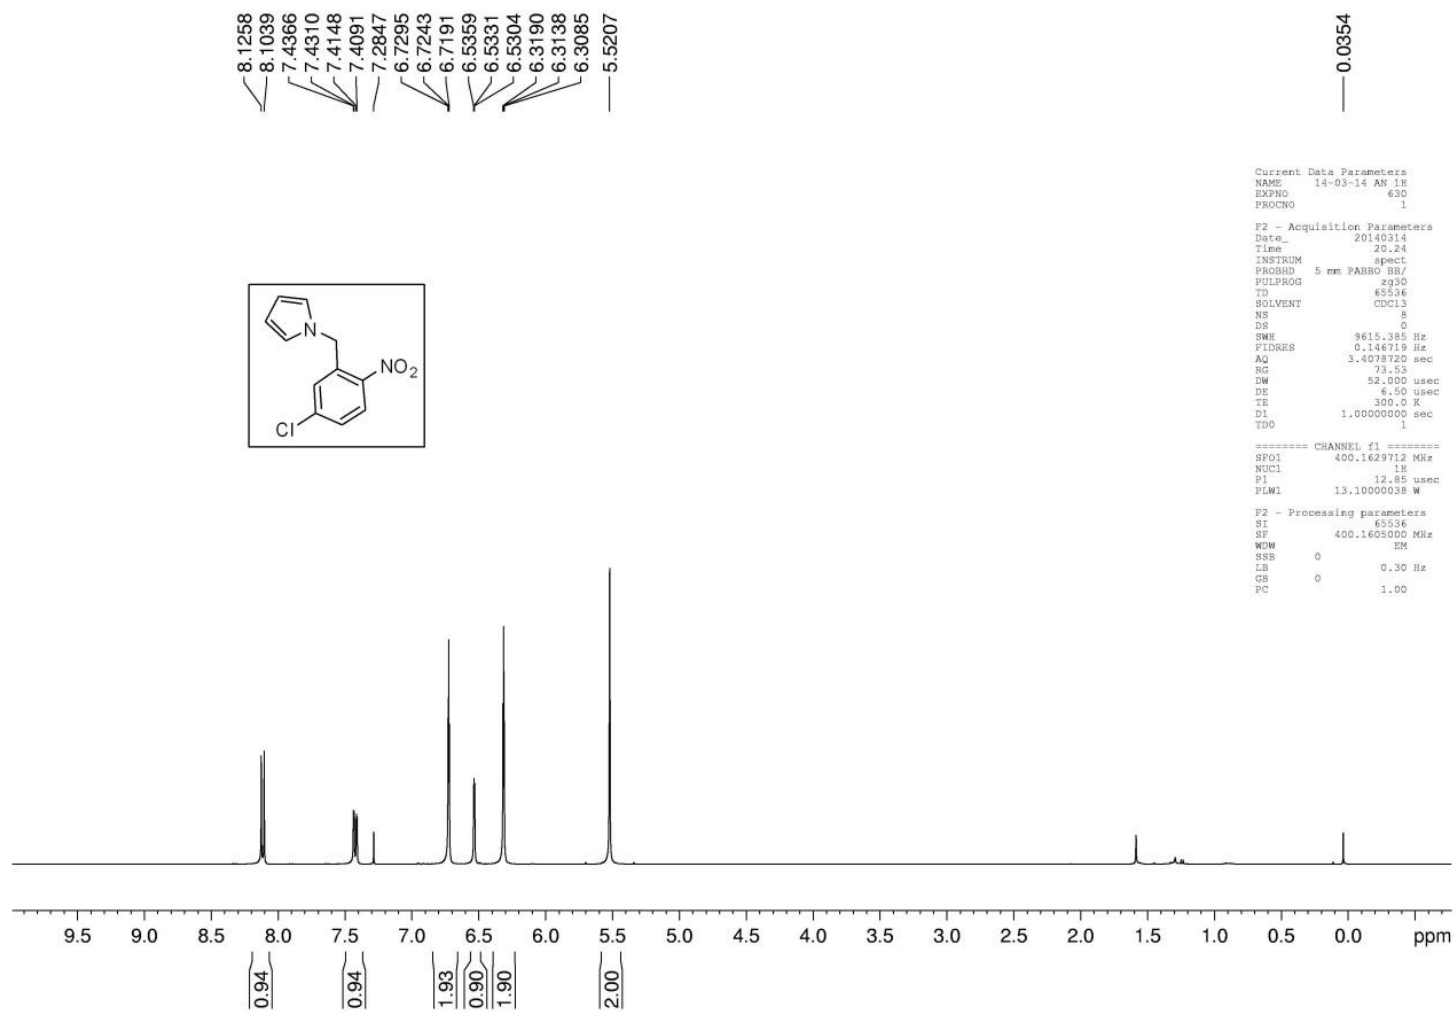

**Fig: S-19**  $^1\text{H-NMR}$  spectrum of 1-(5-Chloro-2-nitrobenzyl)-1H-pyrrole (**2j**).



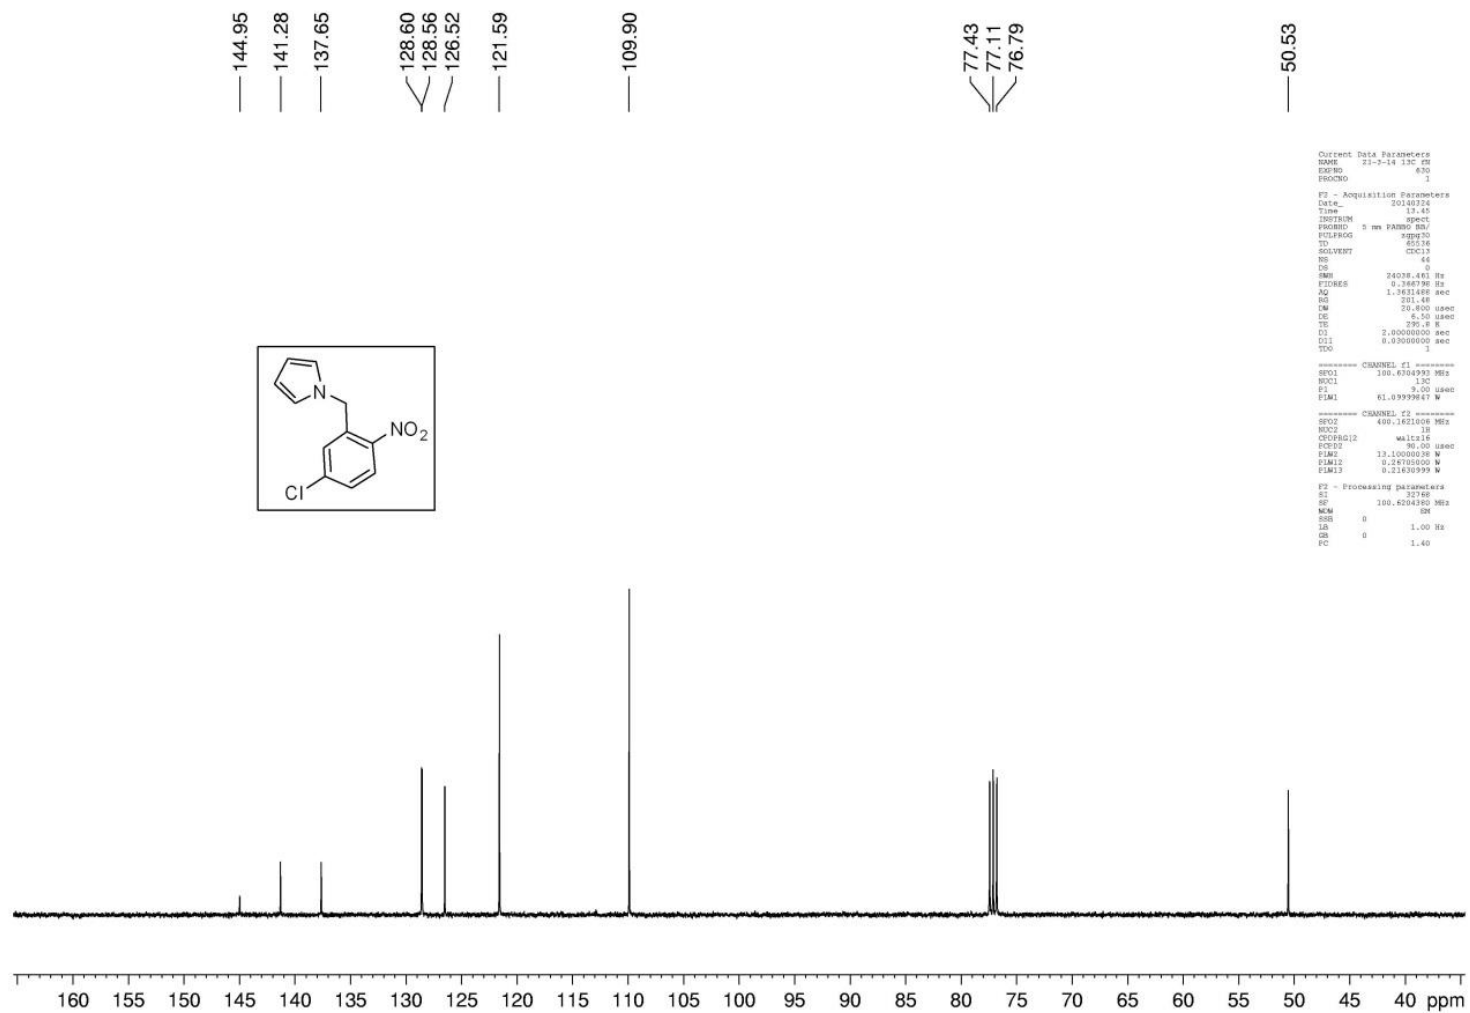

Fig: S-20  $^{13}\text{C}$ -NMR spectrum of 1-(5-Chloro-2-nitrobenzyl)-1H-pyrrole (**2j**).

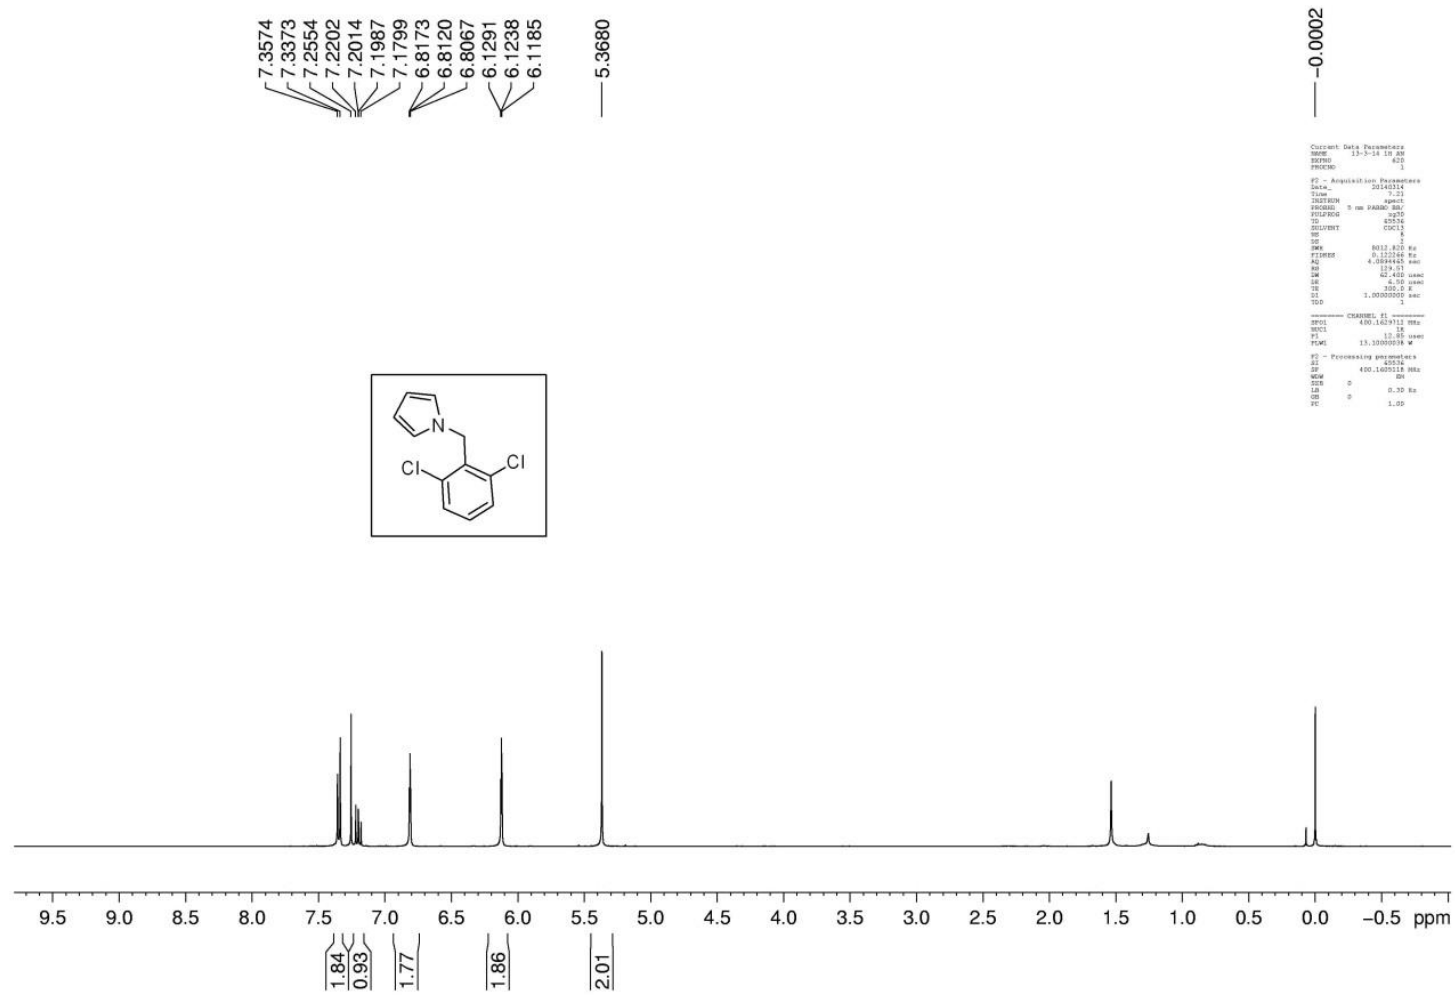

**Fig: S-21** <sup>1</sup>H-NMR spectrum of 1-(2,6-Dichlorobenzyl)-1*H*-pyrrole (**2k**).

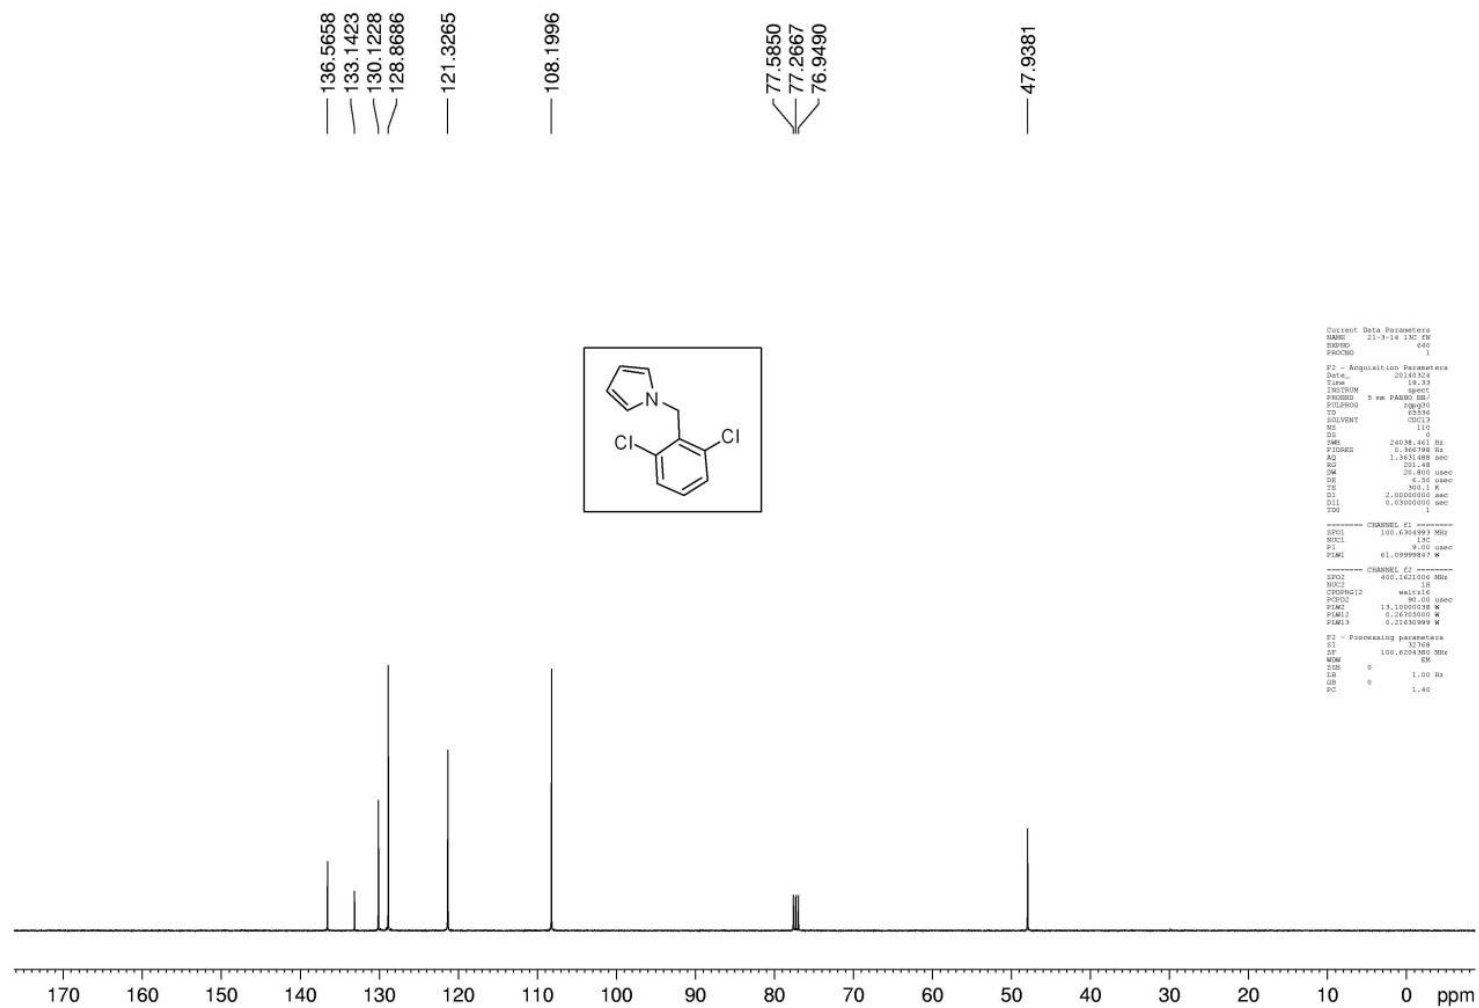

```

Current Data Parameters
NAME: 21-3-14 13C 48
EXPNO: 640
PROCNO: 1

F2 - Acquisition Parameters
Date_: 2016054
Time: 19.33
INSTRUM: spect
PROBHD: 5 mm PABBO BB/
PULPROG: zgpg30
TD: 65536
SOLVENT: CDCl3
DS: 4
DE: 110
AQ: 0
ZMG: 24036.461 Hz
F2FREQ: 9.402798 MHz
RG: 1.341188 sec
AQ: 231.48
SW: 21.860 MHz
DE: 6.30 MHz
TE: 300.1 K
D1: 2.0000000 sec
D11: 0.0300000 sec
D2: 1

===== CHANNEL f1 =====
NUC1: 13C
P1: 9.000 usec
P1M1: 61.0999947 W

===== CHANNEL f2 =====
NUC2: 13C
P2: 9.000 usec
P2M2: 61.0999947 W

F2 - Processing parameters
SI: 32768
SF: 100.6284600 MHz
WDW: EM
SSB: 0
LB: 1.00 Hz
GB: 0
PC: 1.40
  
```

**Fig: S-22** <sup>13</sup>C-NMR spectrum of 1-(2,6-Dichlorobenzyl)-1H-pyrrole (**2k**).

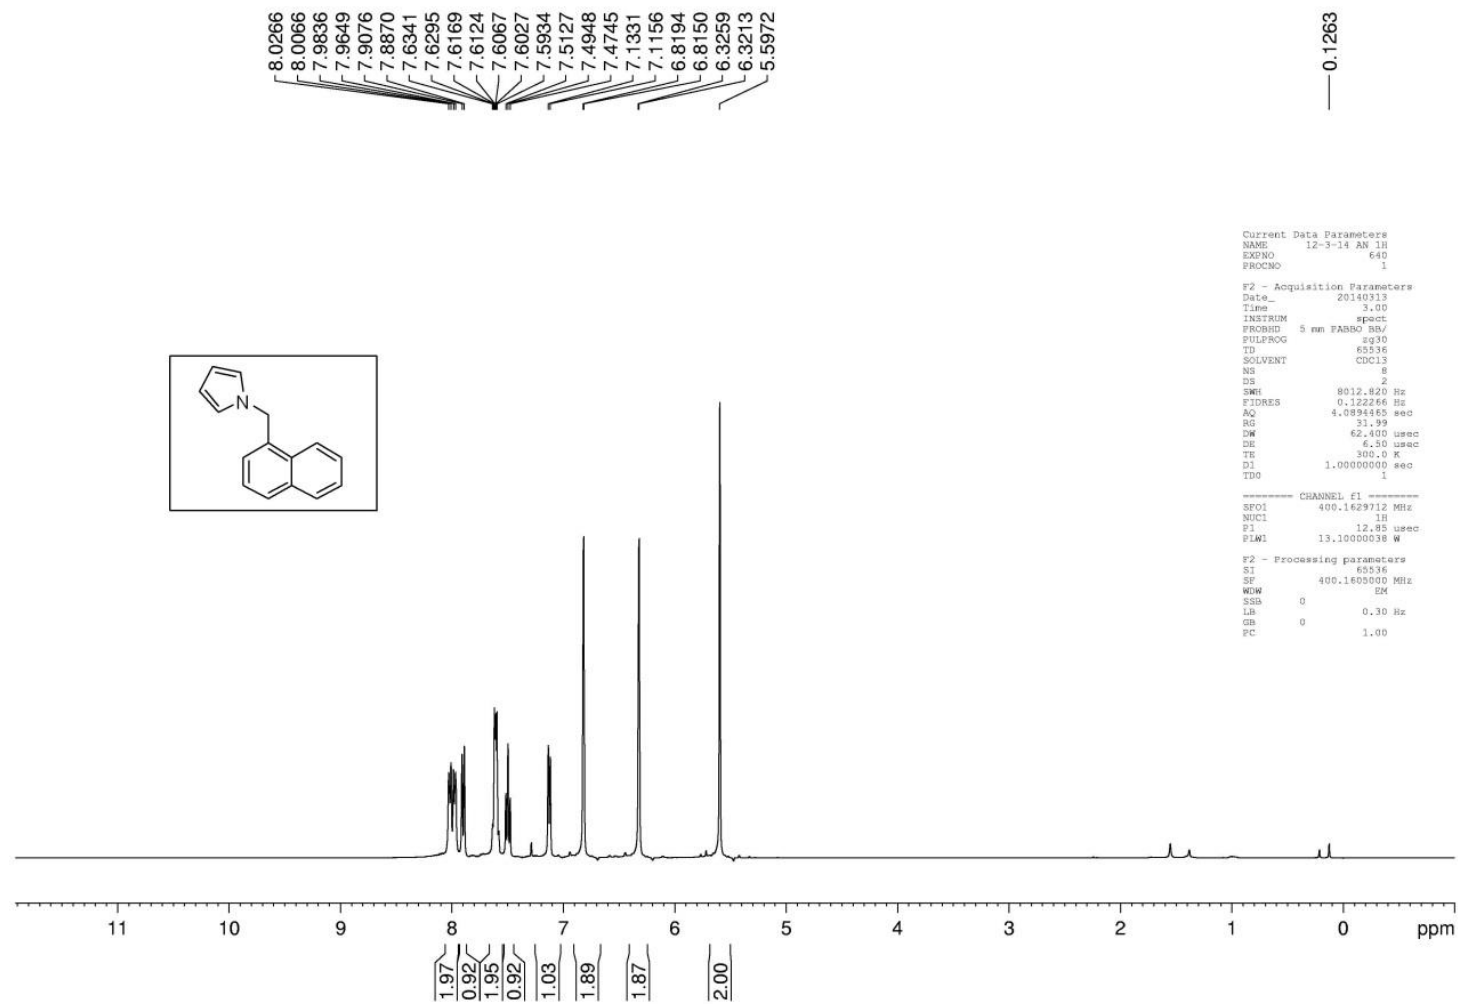

**Fig: S-23**  $^1\text{H}$ -NMR spectrum of 1-(Naphthalen-1-ylmethyl)-1H-pyrrole (**2l**).

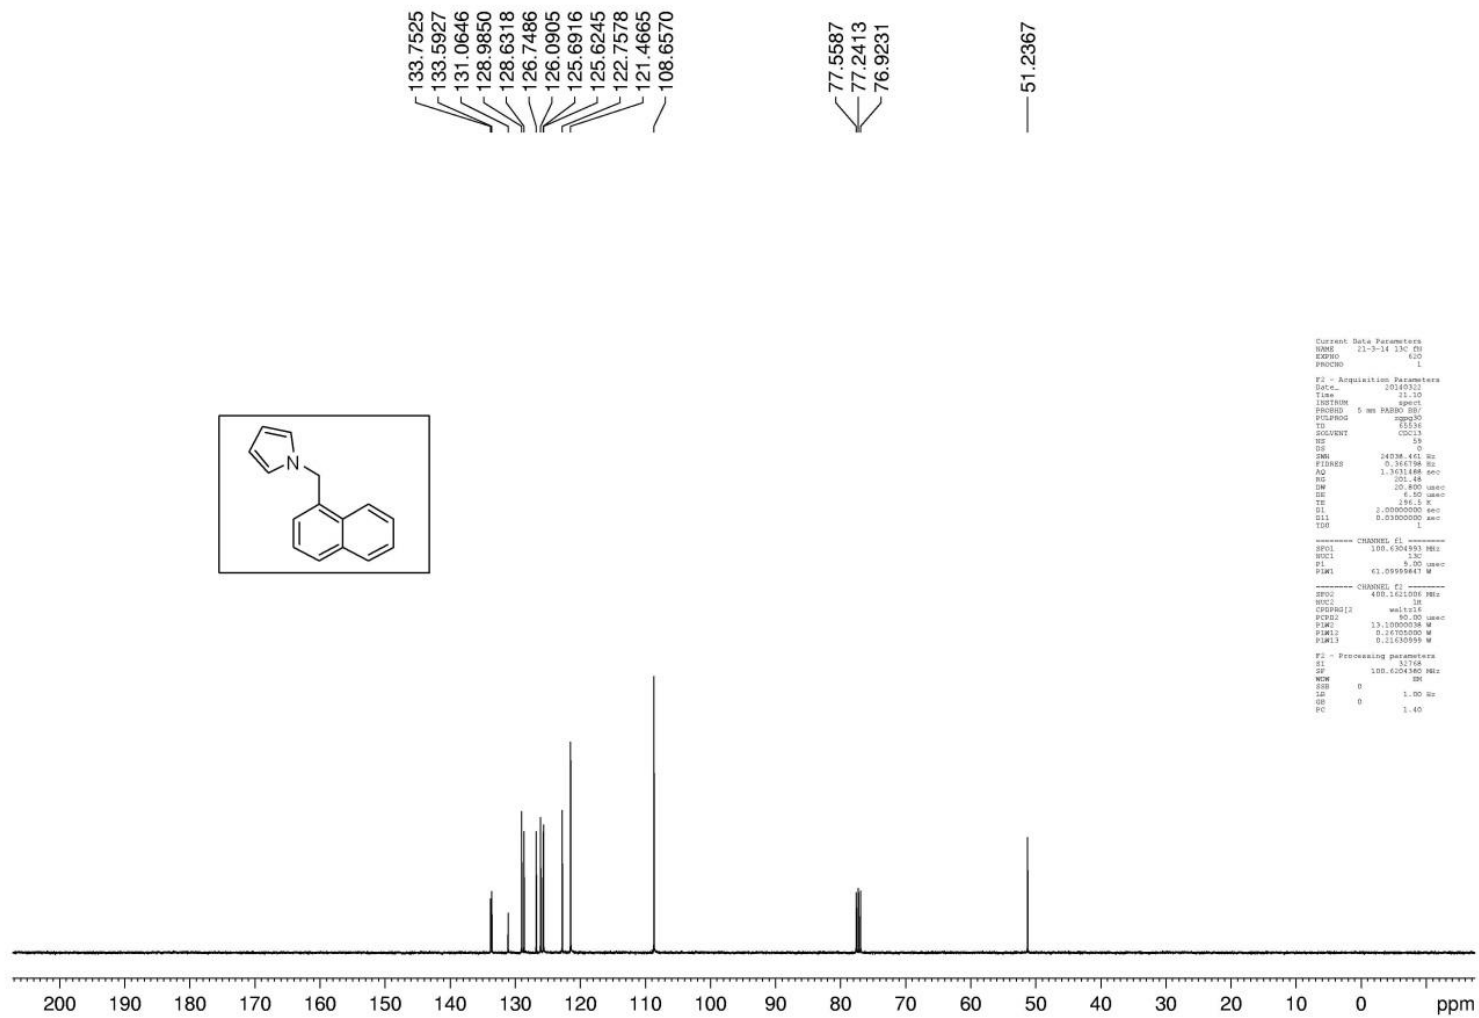

Fig: S-24 <sup>13</sup>C-NMR spectrum of 1-(Naphthalen-1-ylmethyl)-1H-pyrrole (21).

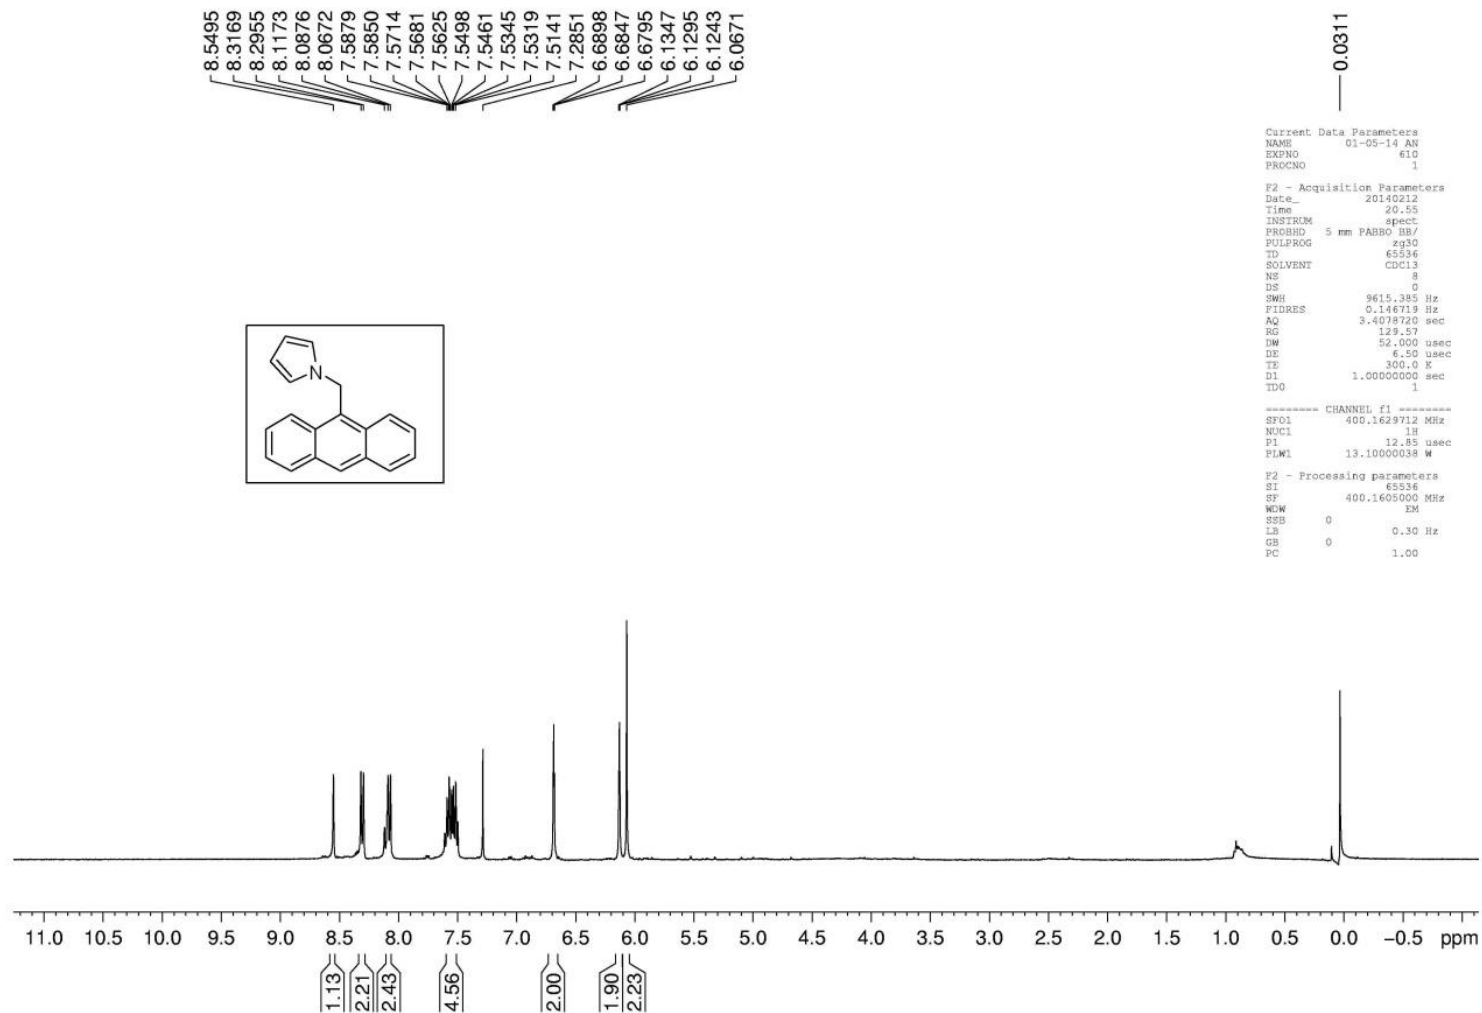

Fig: S-25 <sup>1</sup>H-NMR spectrum of 1-(Anthracen-9-ylmethyl)-1H-pyrrole (2m).

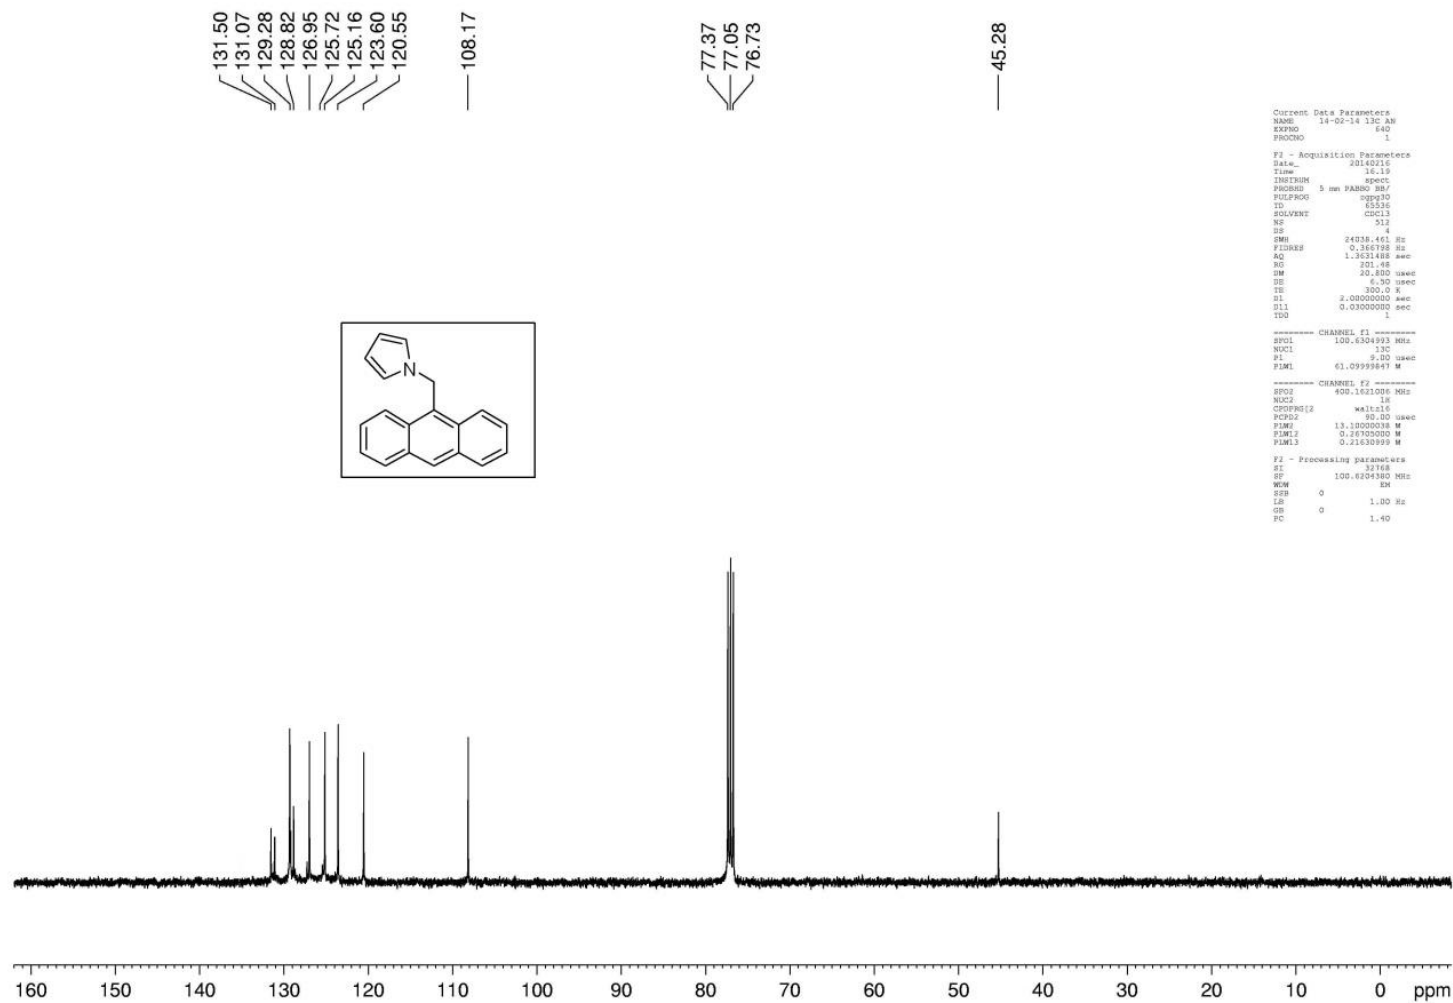

**Fig: S-26** <sup>13</sup>C-NMR spectrum of 1-(Anthracen-9-ylmethyl)-1H-pyrrole (**2m**).

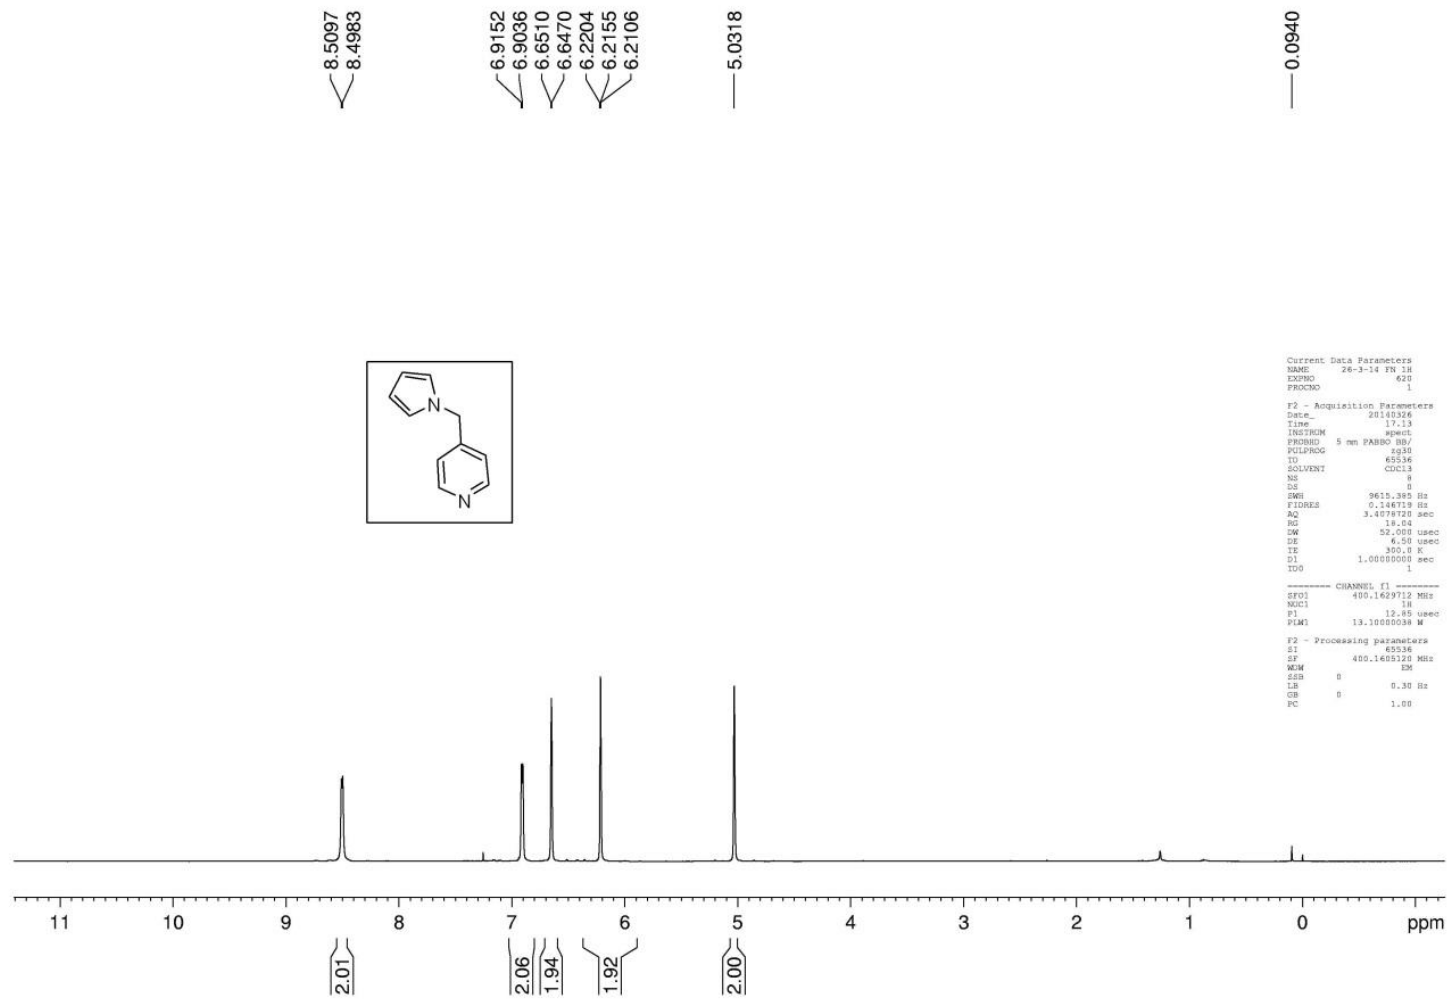

Fig: S-27 <sup>1</sup>H-NMR spectrum of 4-((1*H*-pyrrol-1-yl)methyl)pyridine (**2n**).



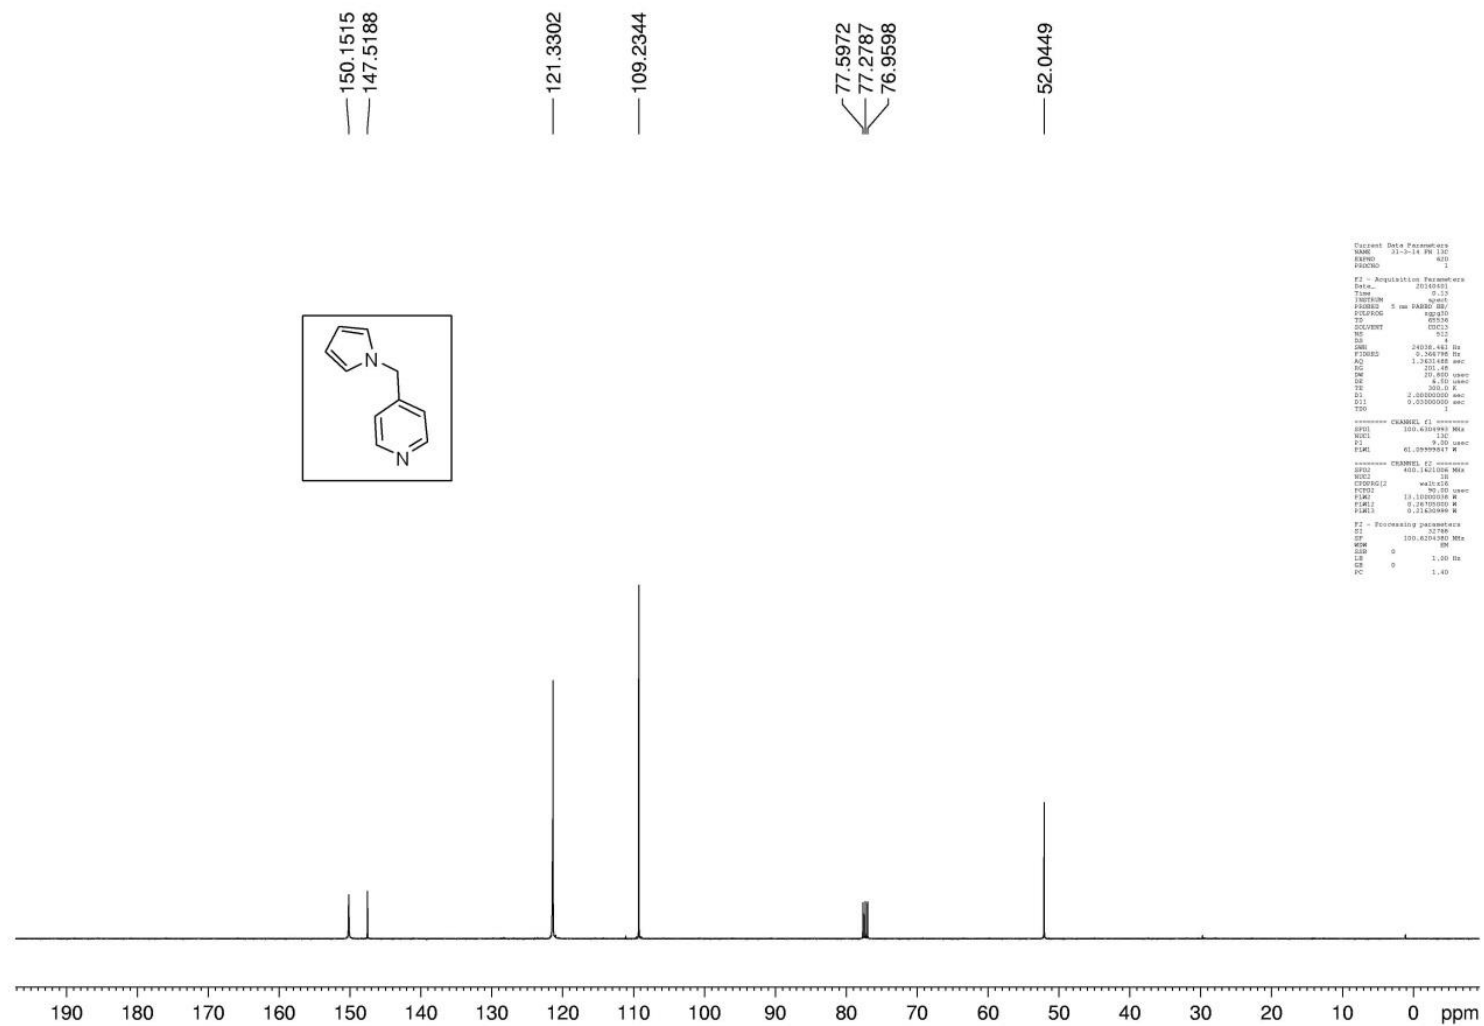

**Fig: S-28** <sup>13</sup>C-NMR spectrum of 4-((1H-pyrrol-1-yl)methyl)pyridine (**2n**).

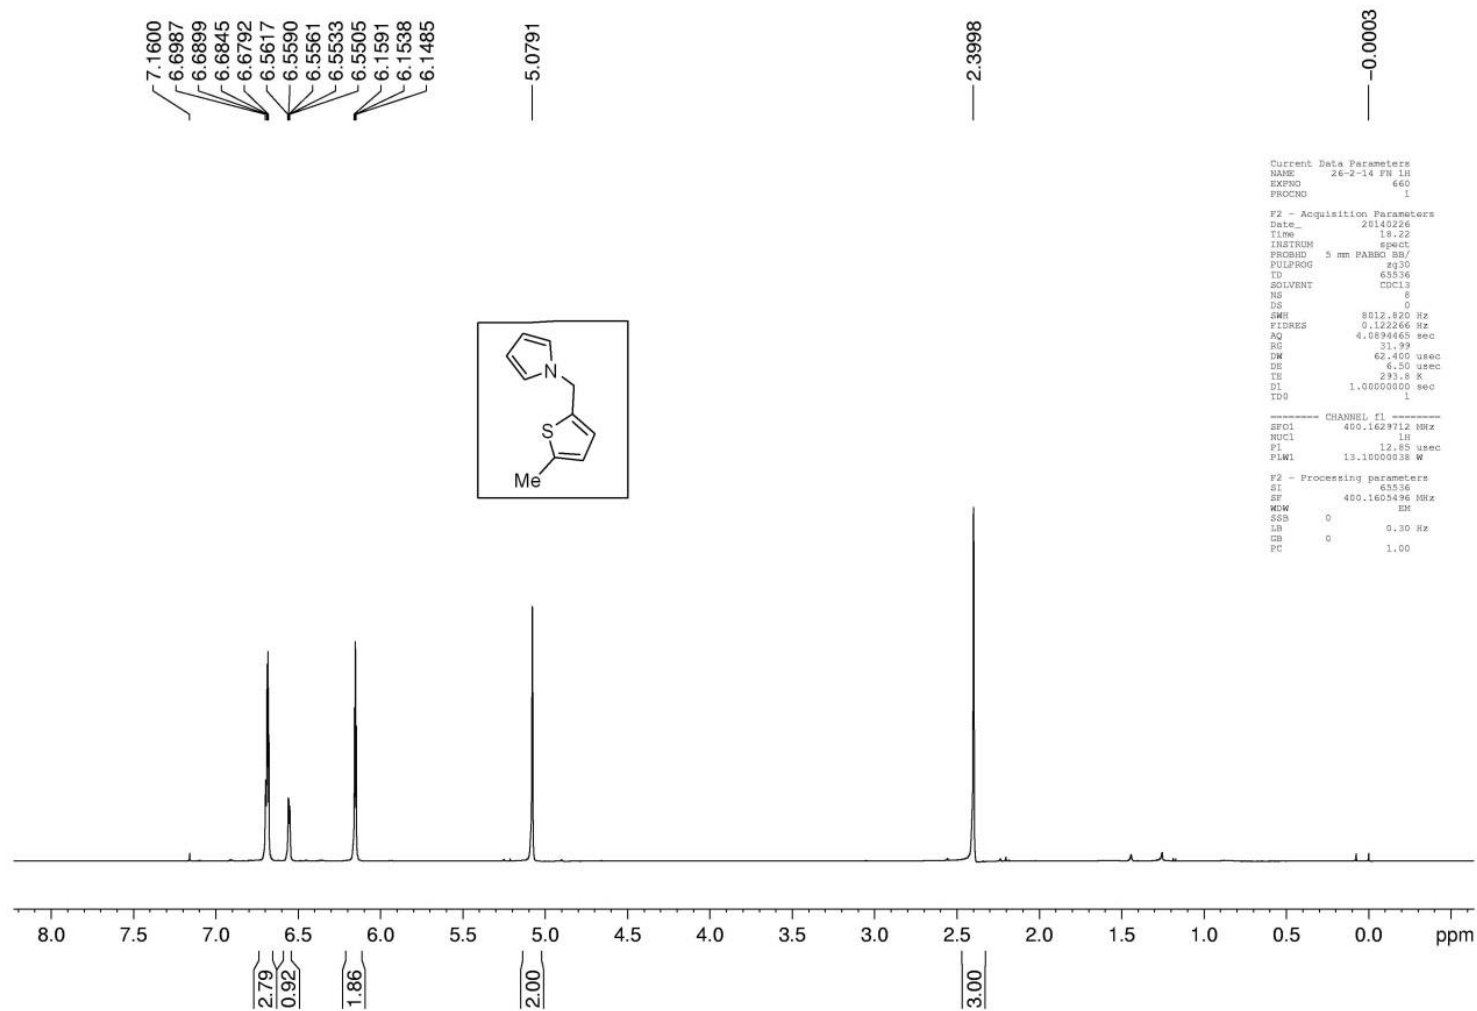

Fig: S-29 <sup>1</sup>H-NMR spectrum of 1-((5-Methylthiophen-2-yl)methyl)-1H-pyrrole (**2o**).

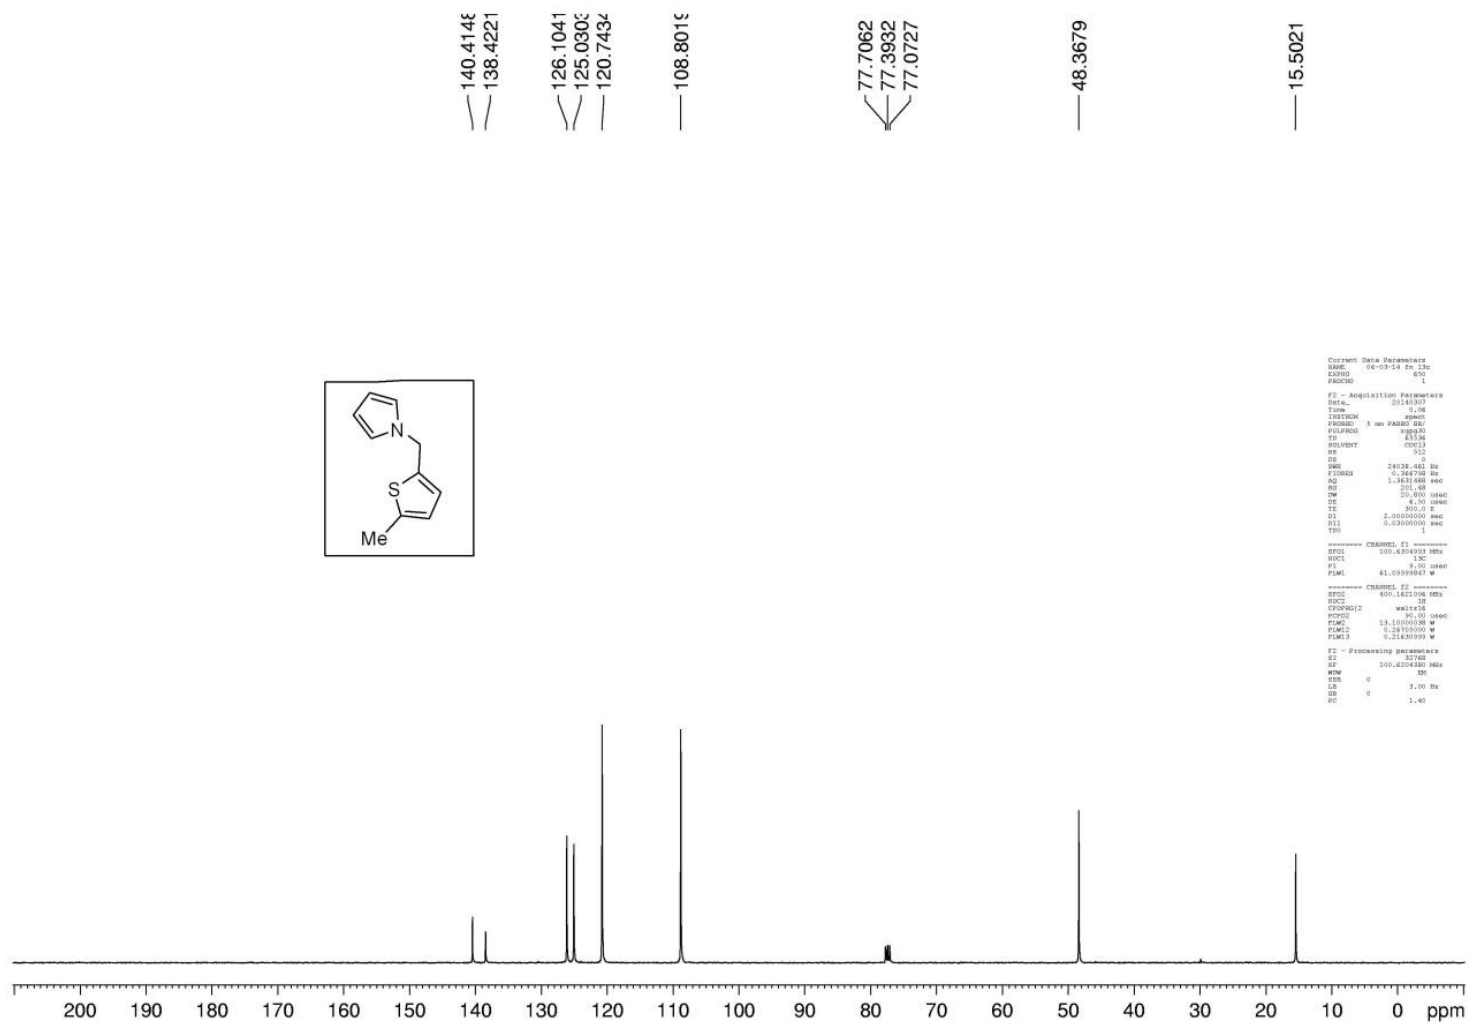

Fig: S-30  $^{13}\text{C}$ -NMR spectrum of 1-((5-Methylthiophen-2-yl)methyl)-1H-pyrrole (**2o**).

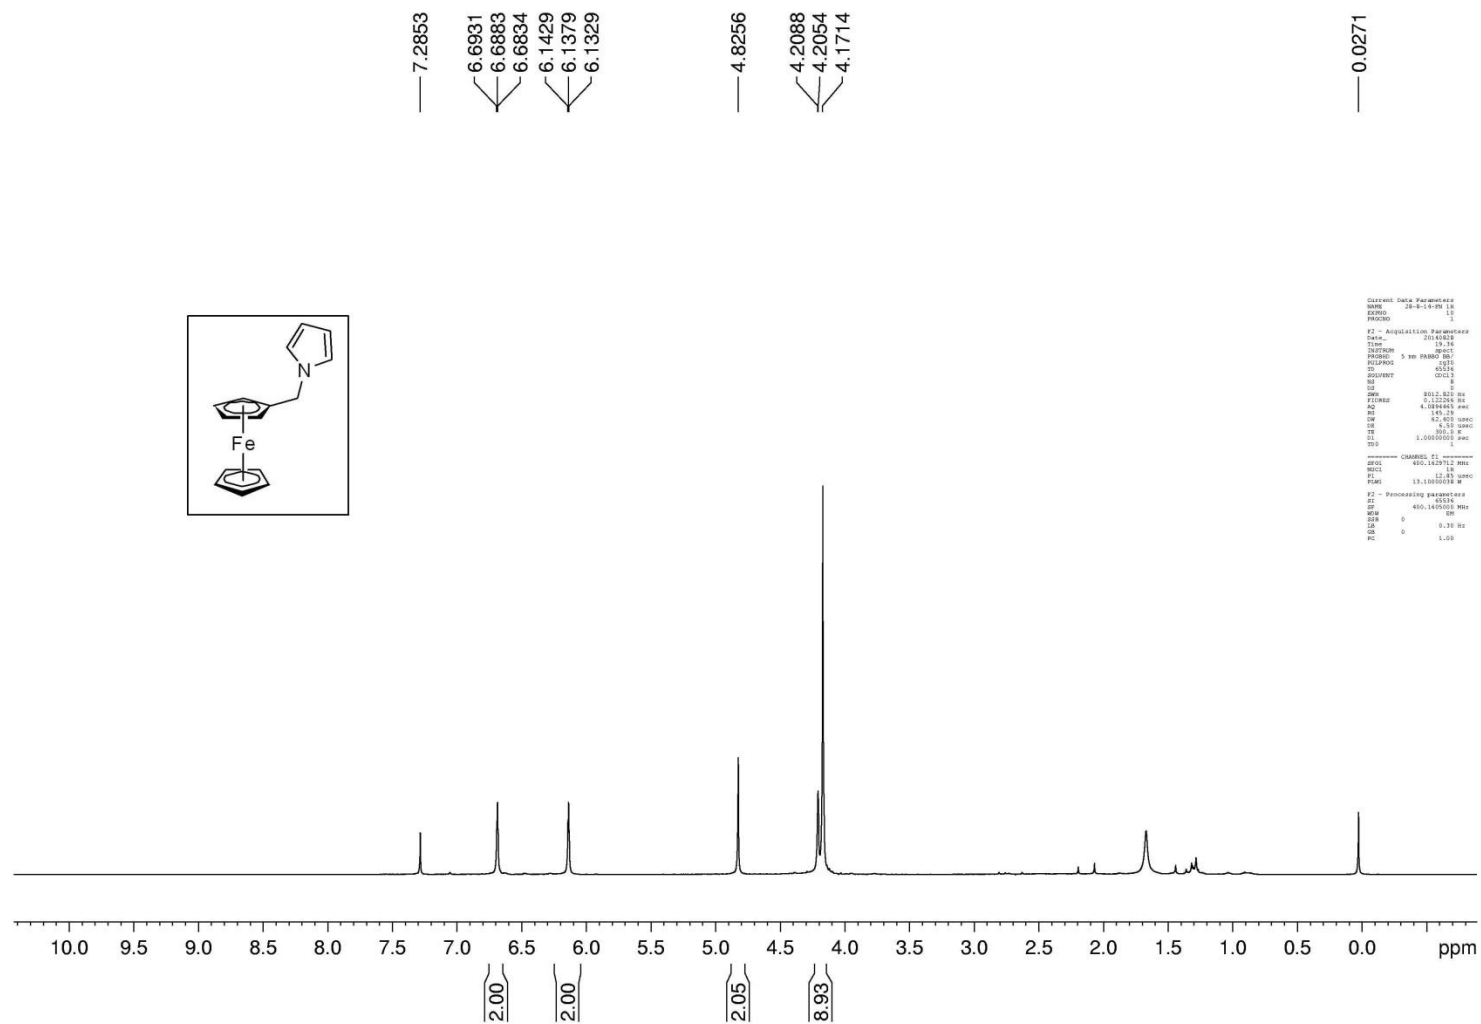

**Fig: S-31** <sup>1</sup>H-NMR spectrum of Ferrocene (**2p**).

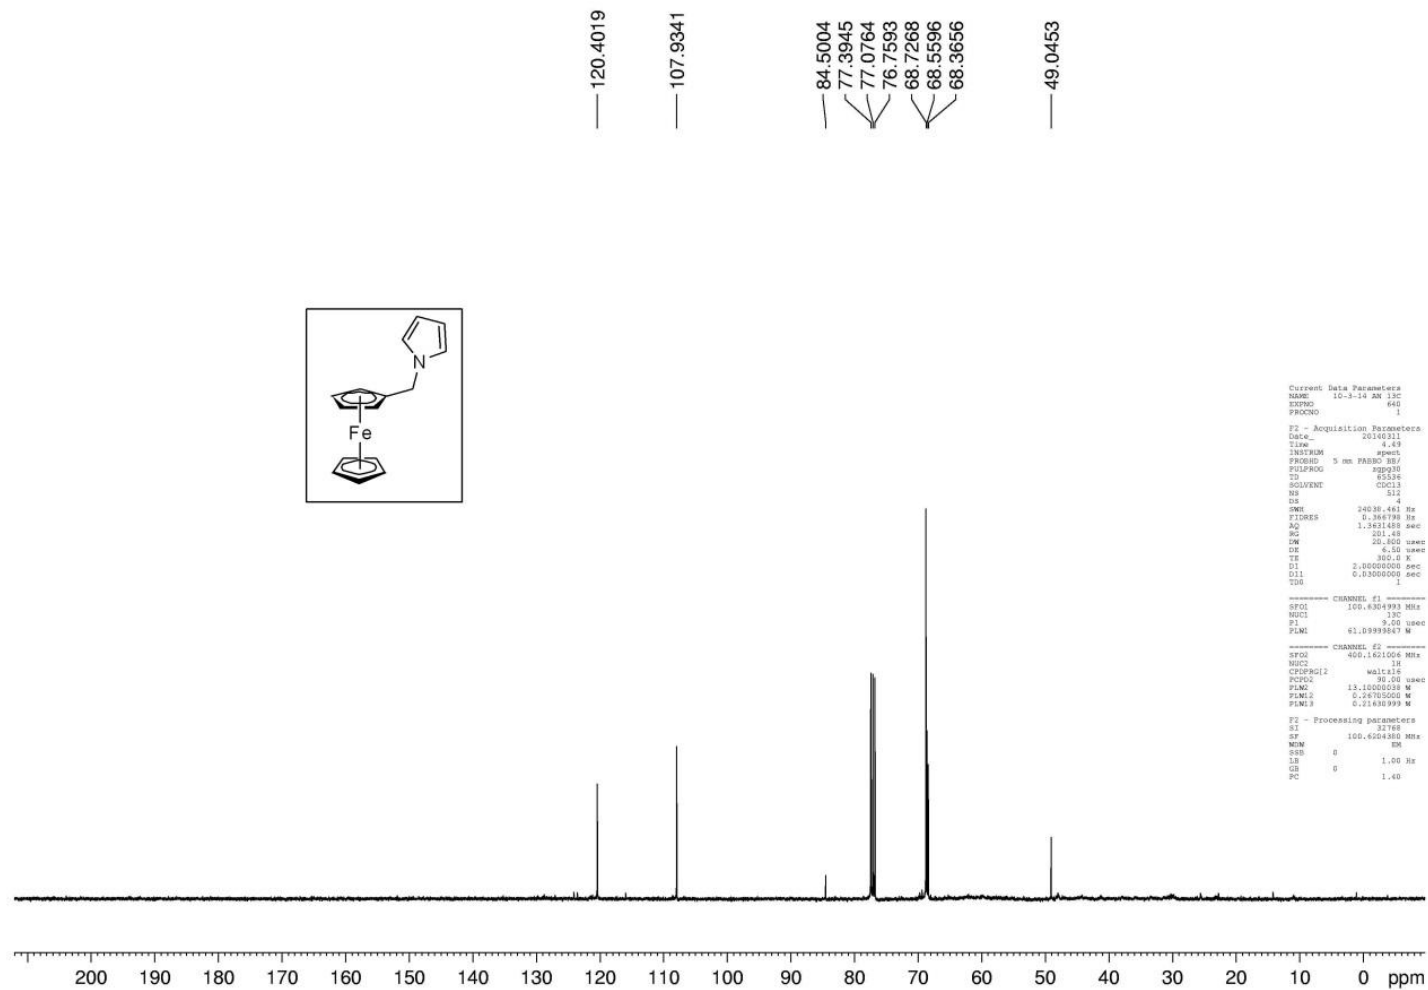

Fig: S-32  $^{13}\text{C}$ -NMR spectrum of Ferrocene (2p).

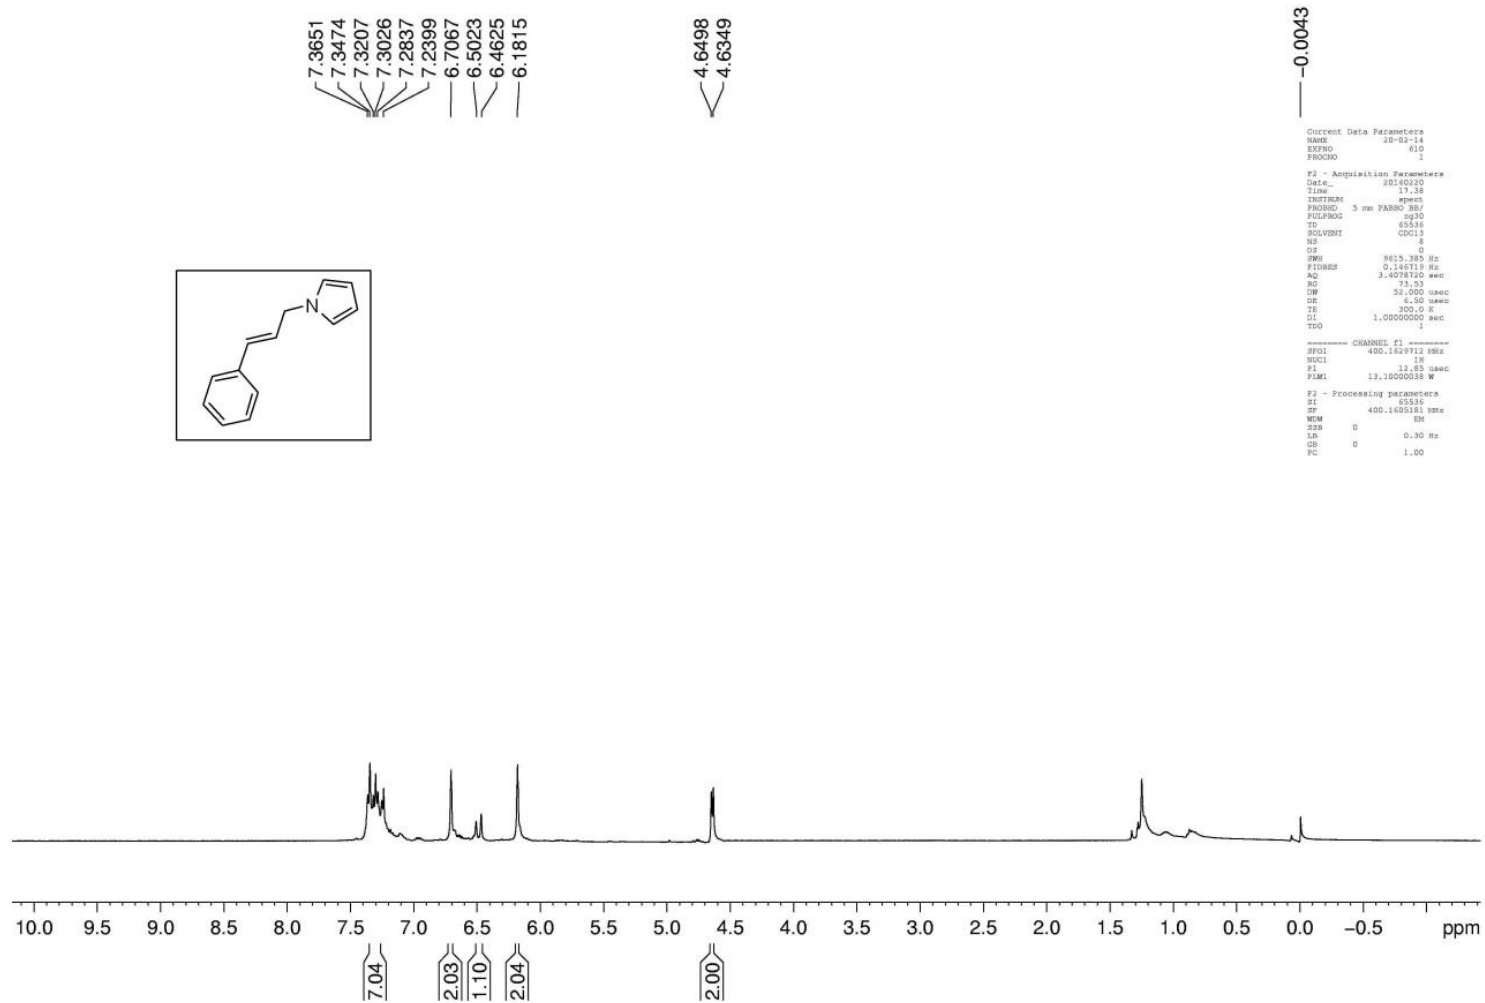

Fig: S-33  $^1\text{H}$ -NMR spectrum of 1-Cinnamyl-1H-pyrrole (2q).

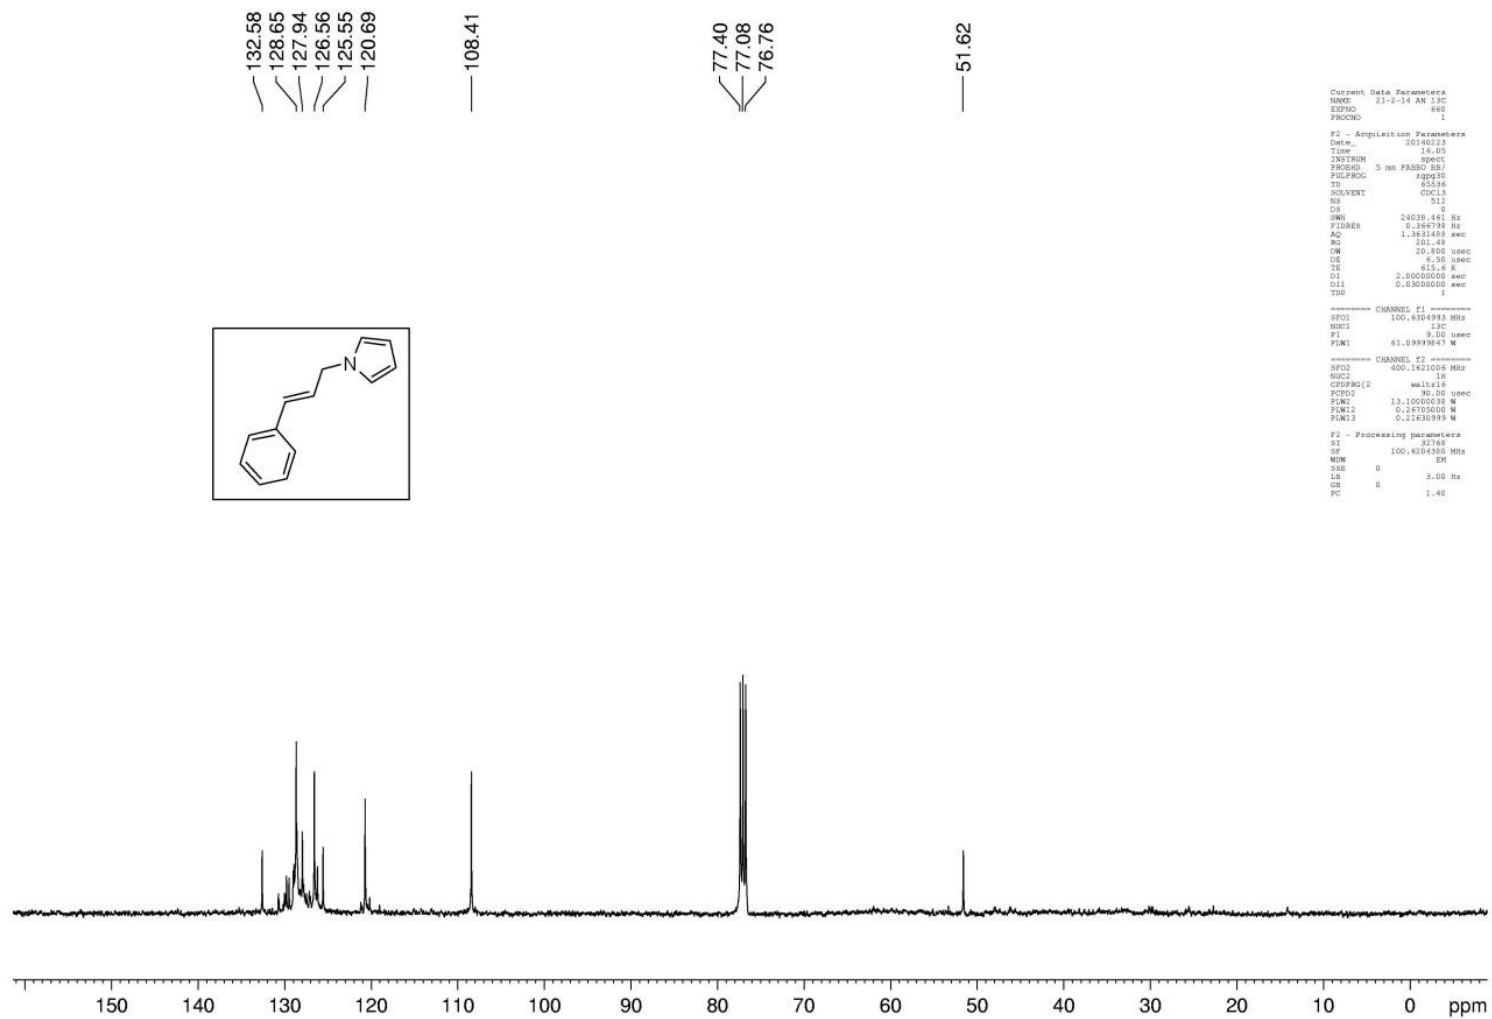

**Fig: S-34**  $^{13}\text{C}$ -NMR spectrum of 1-Cinnamyl-1H-pyrrole (**2q**).

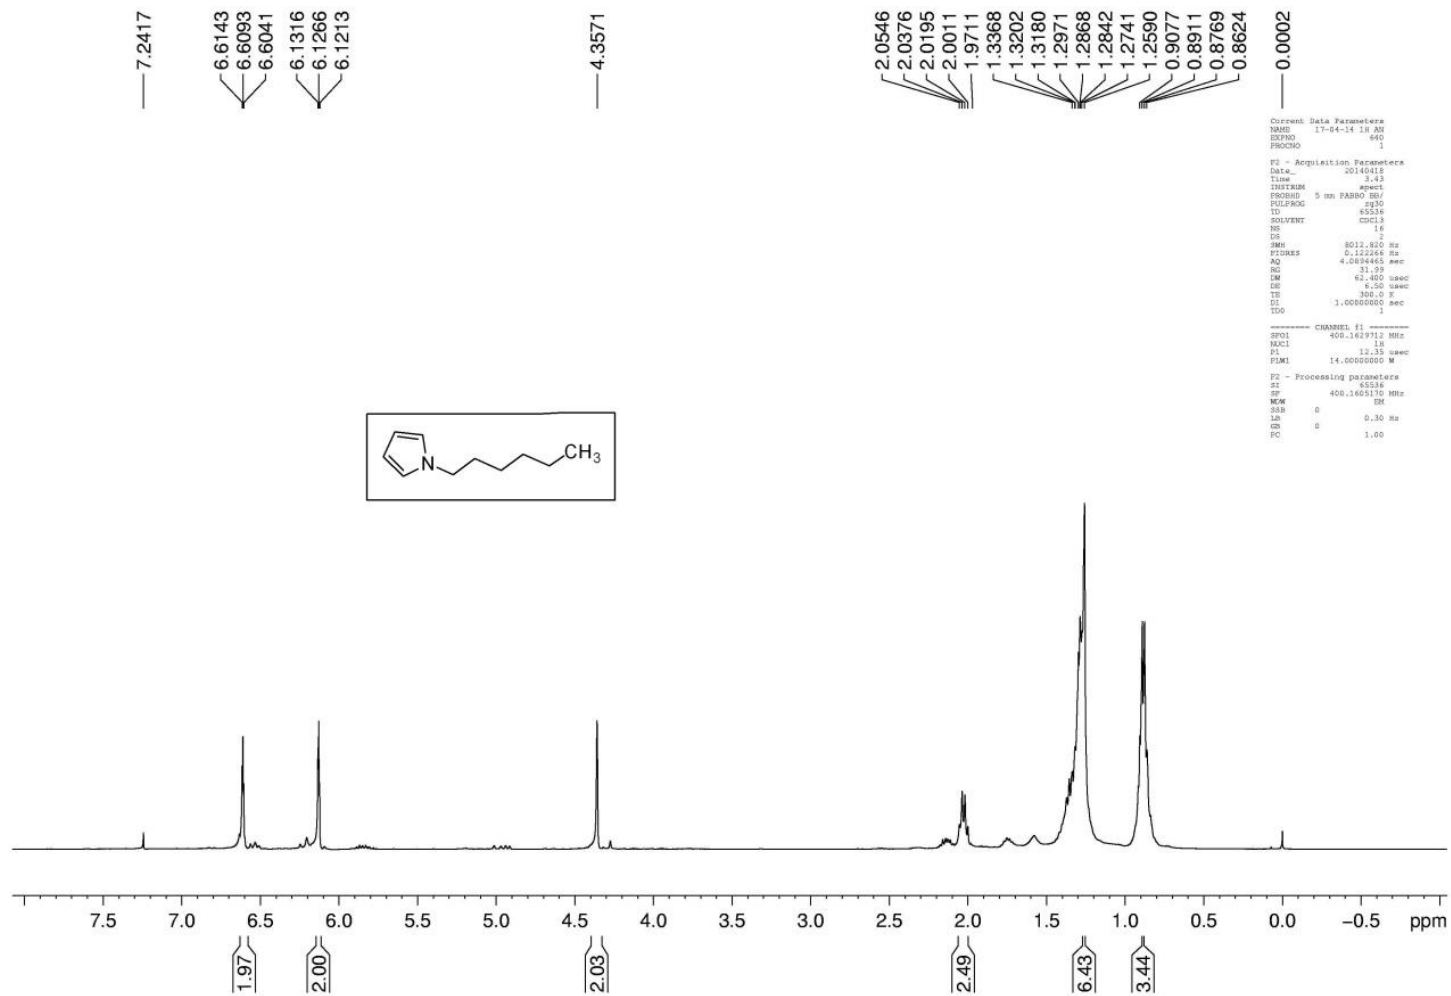

**Fig: S-35**  $^1\text{H}$ -NMR spectrum of 1-Hexyl-1*H*-pyrrole (**2r**).



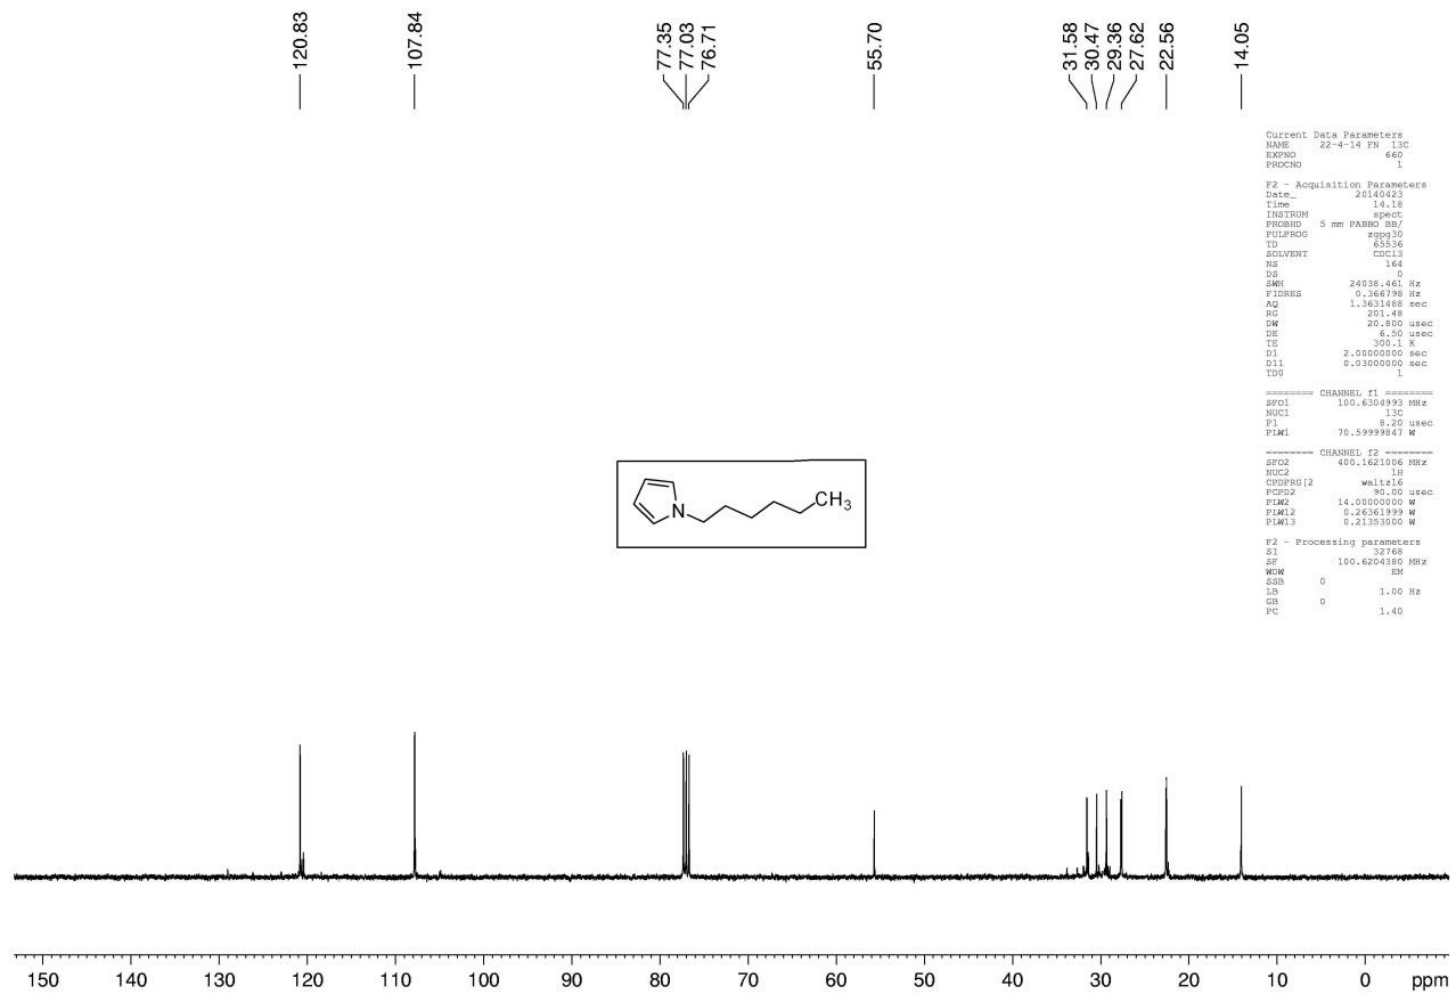

**Fig: S-36**  $^{13}\text{C}$ -NMR spectrum of 1-Hexyl-1H-pyrrole (**2r**).

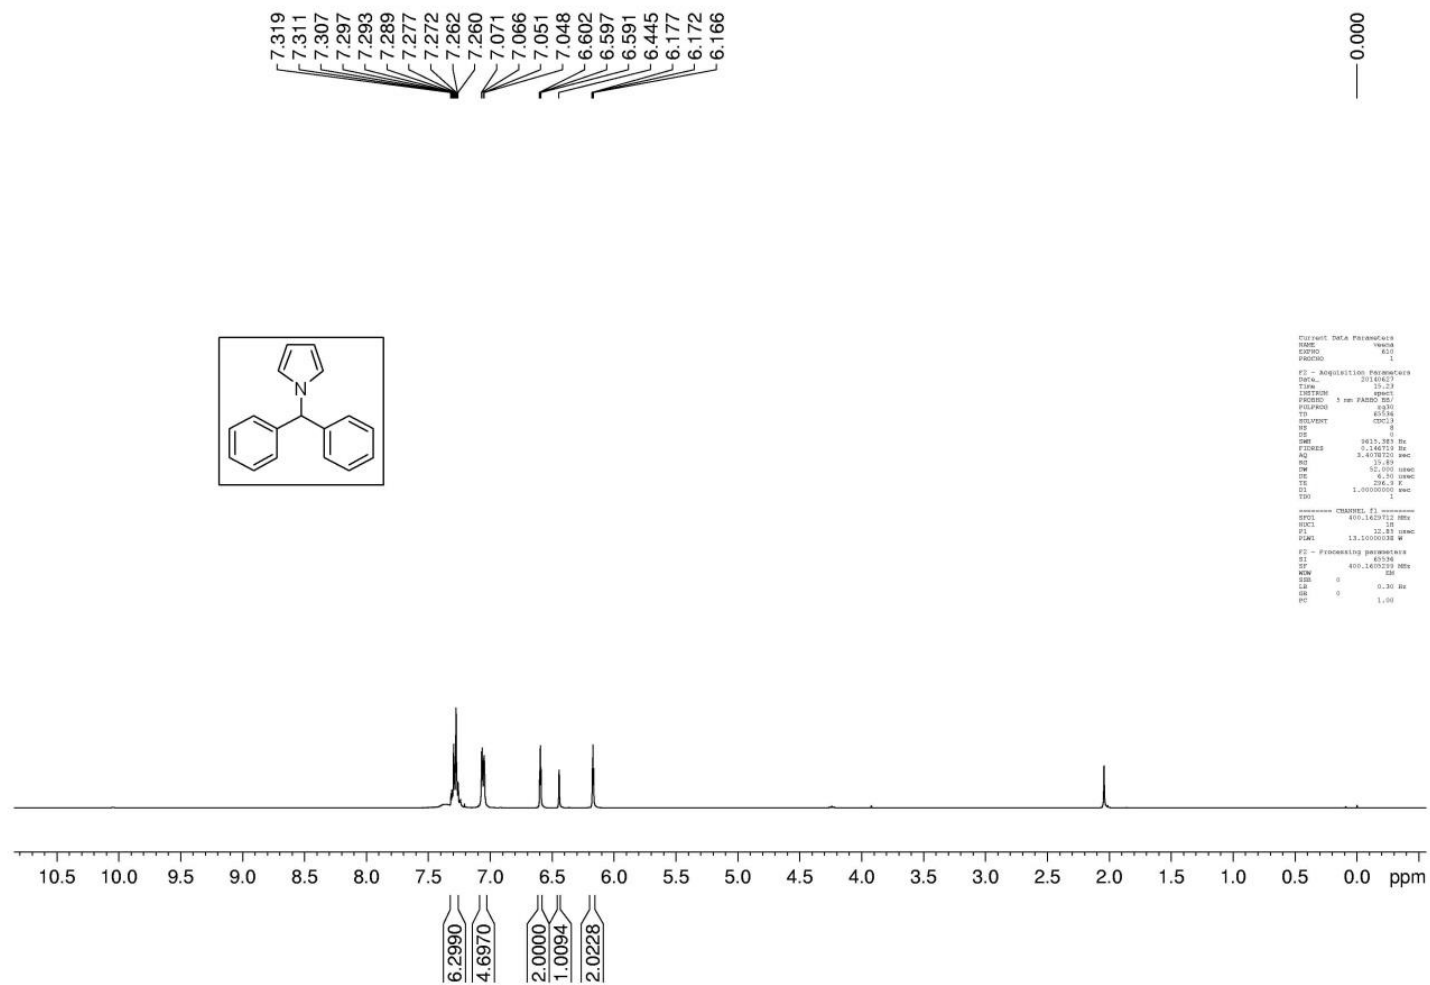

**Fig: S-37** <sup>1</sup>H-NMR spectrum of 1-Benzhydryl-1*H*-pyrrole (**2s**).

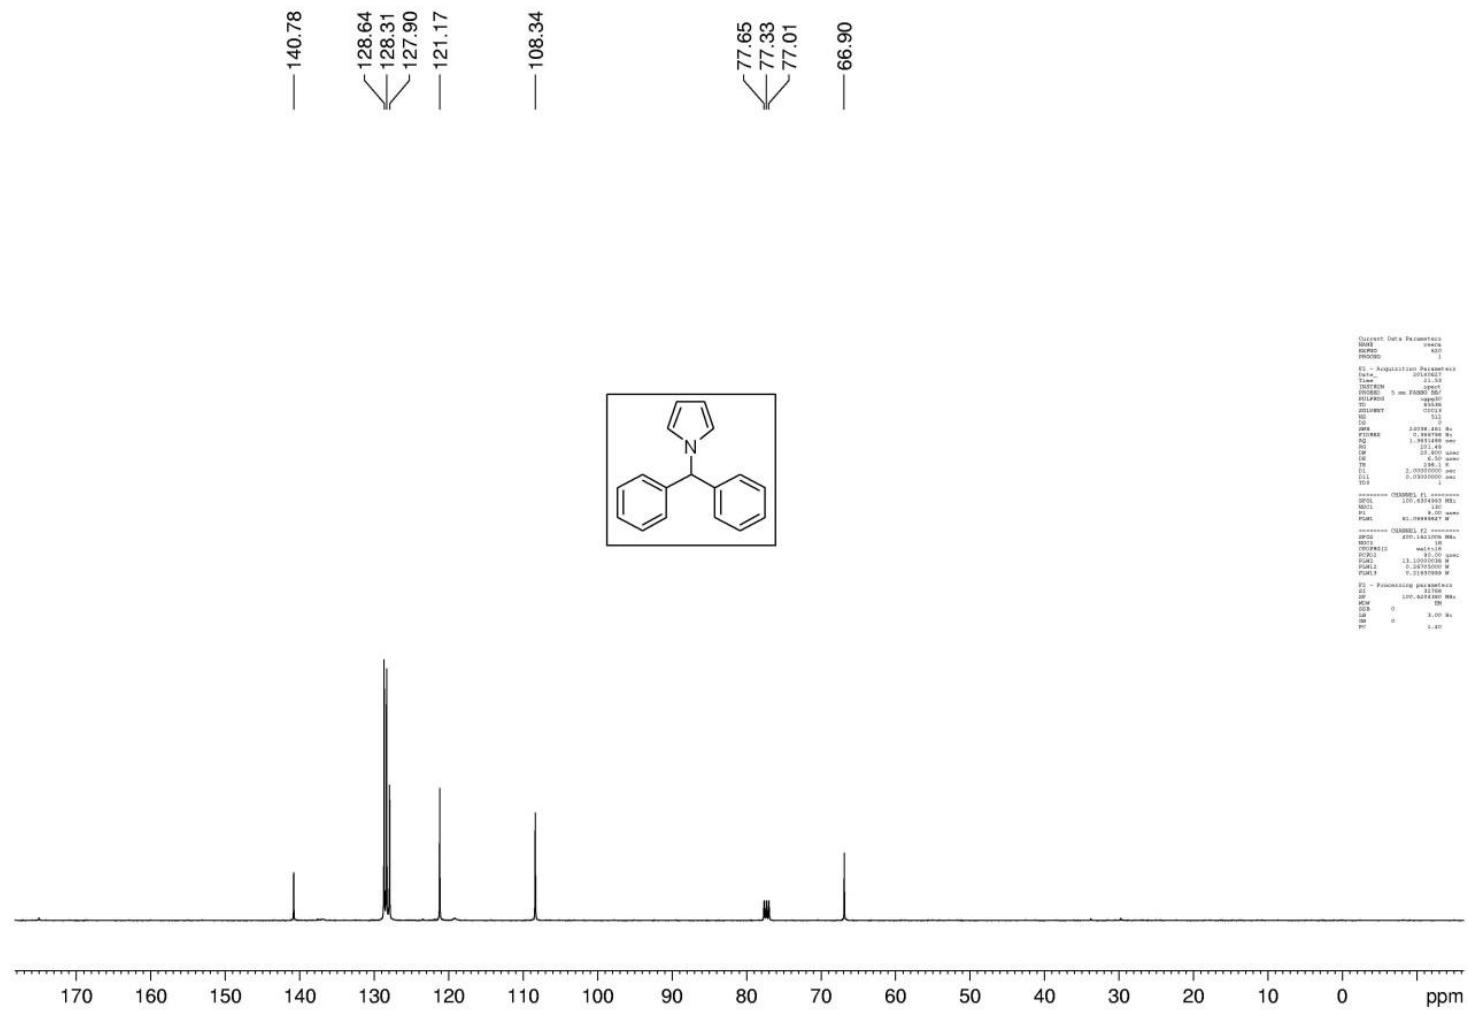

**Fig: S-38** <sup>13</sup>C-NMR spectrum of 1-Benzhydryl-1H-pyrrole (**2s**).

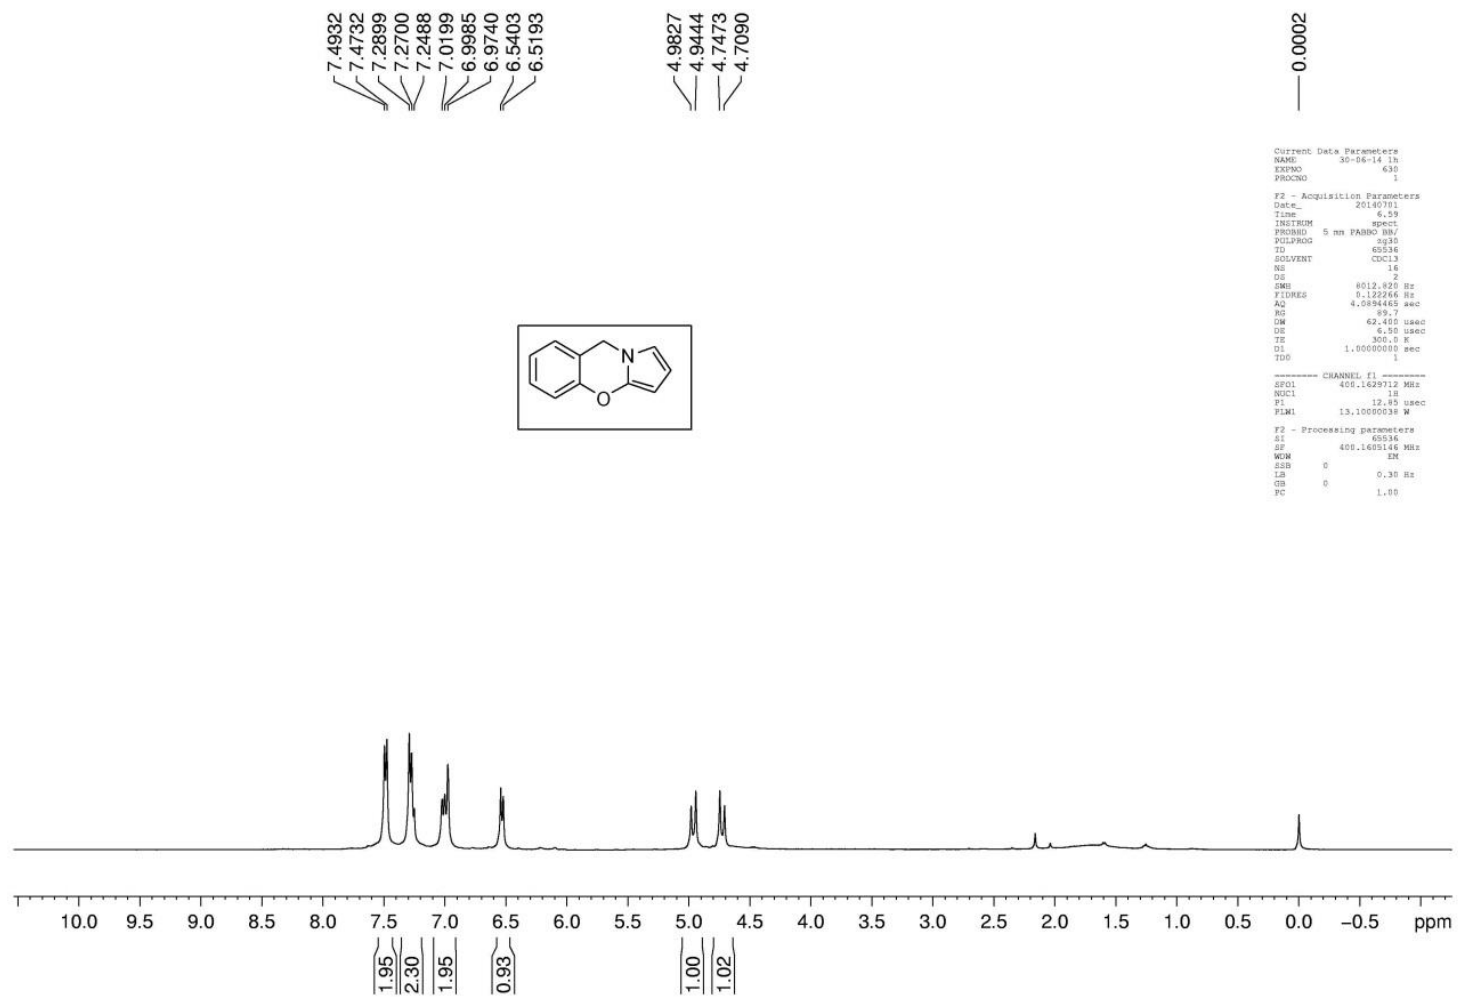

**Fig: S-39**  $^1\text{H-NMR}$  spectrum of 9H-benzo[e]pyrrolo[2,1-b][1,3]oxazine (**3A**).

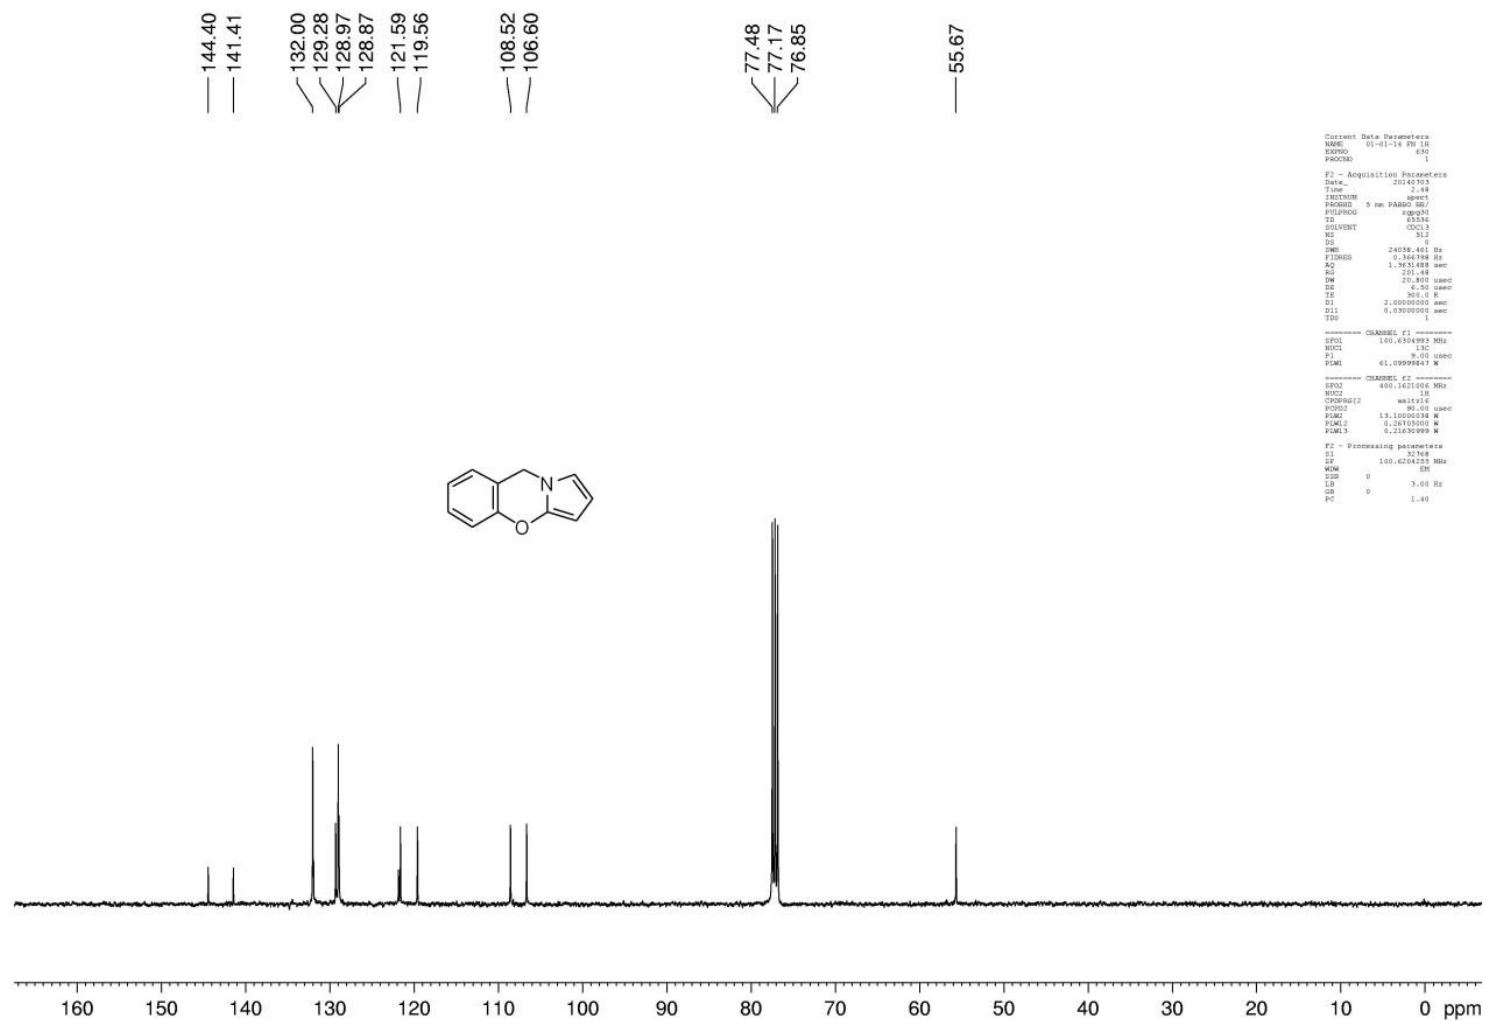

Fig: S-40 <sup>13</sup>C-NMR spectrum of 9H-benzo[e]pyrrolo[2,1-b][1,3]oxazine (3A).

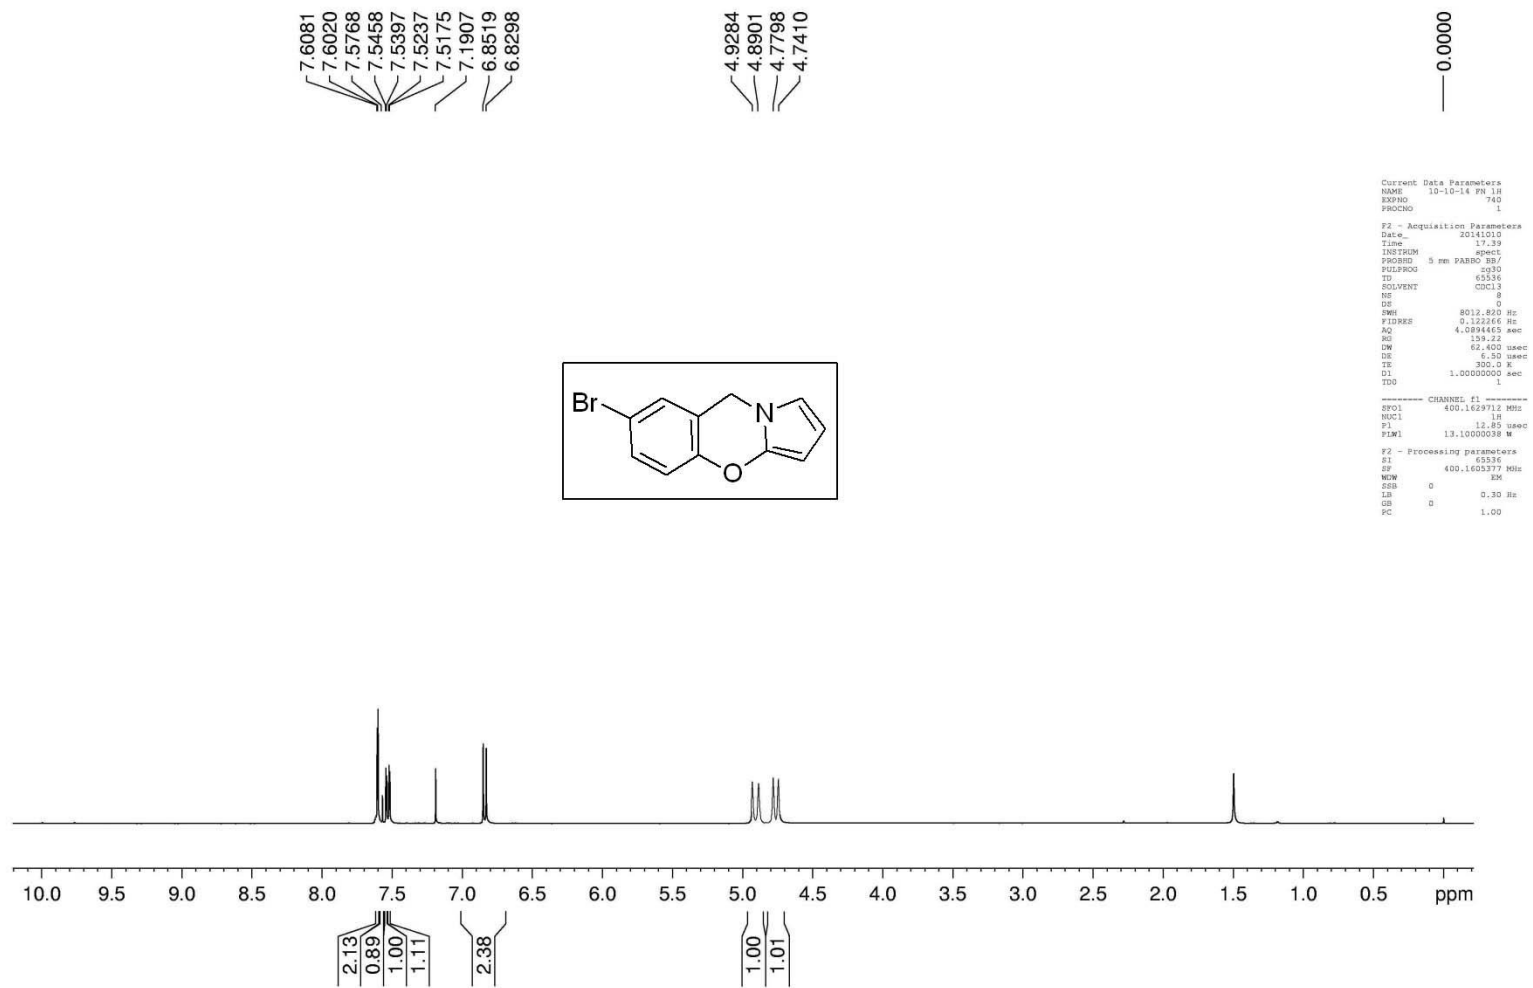

**Fig: S-41**  $^1\text{H}$ -NMR spectrum of 7-Bromo-9H-benzo[e]pyrrolo[2,1-b][1,3]oxazine (**3B**).

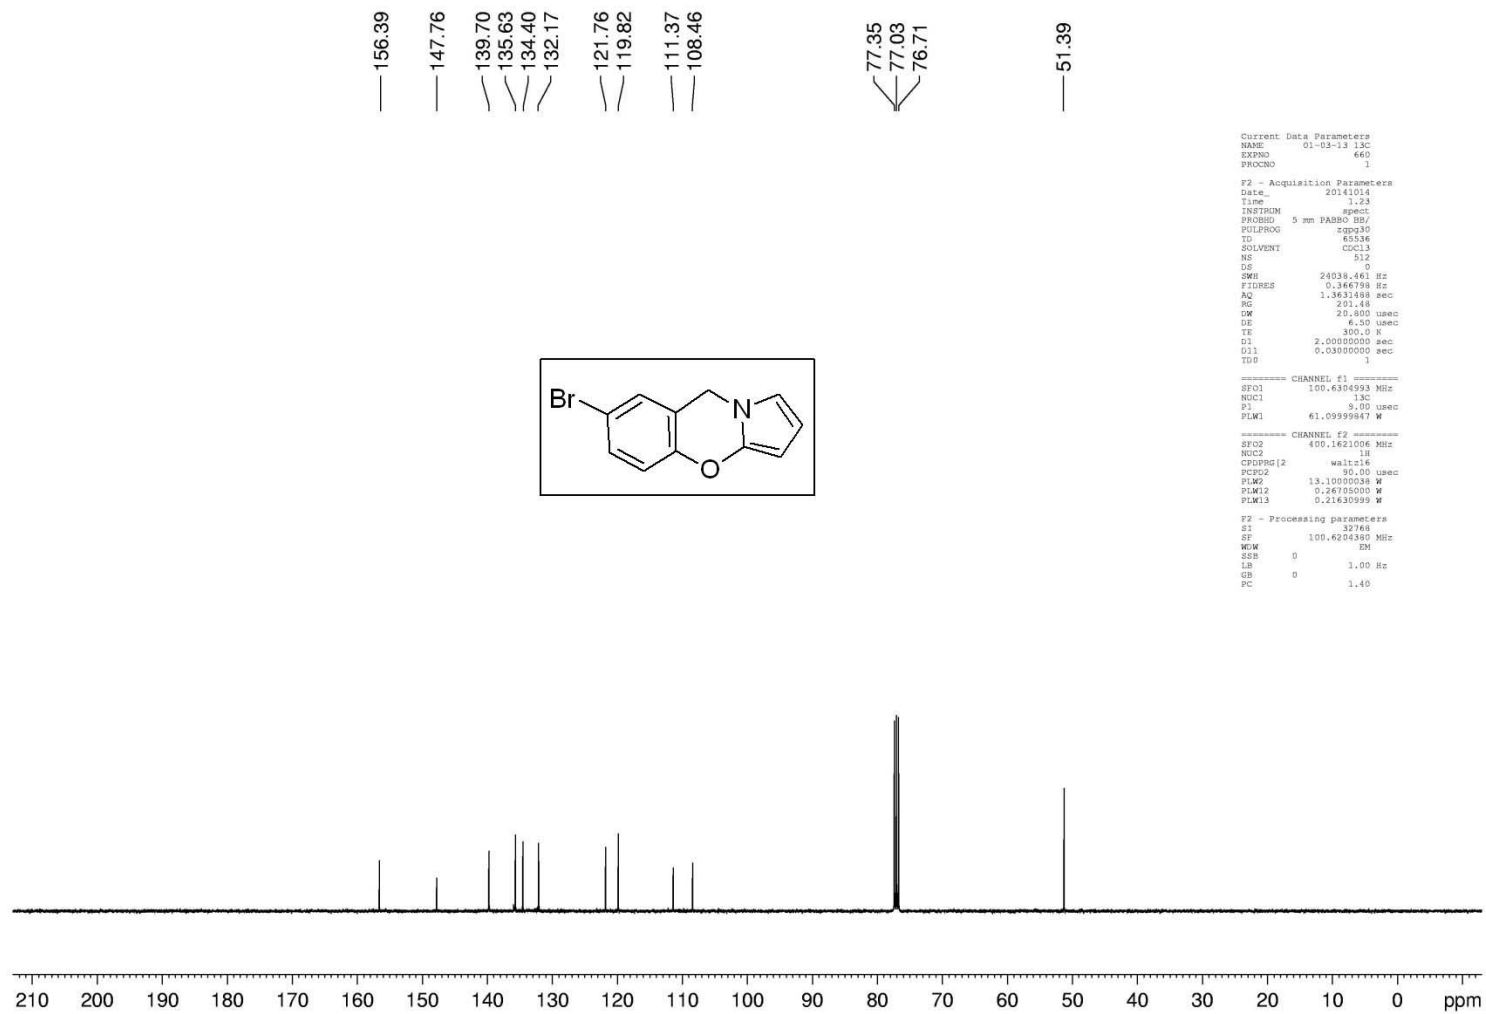

**Fig: S-42** <sup>13</sup>C-NMR spectrum of 7-Bromo-9H-benzo[e]pyrrolo[2,1-b][1,3]oxazine (**3B**).
